# Supplementary material for: Access to C(sp3) borylated and silylated cyclic molecules: hydrogenation of corresponding arenes and heteroarenes
Source: RSC Adv. 2024 Apr 2;14(15):10590–607. doi: 10.1039/d4ra00491d (PMC10985595; doi:10.1039/d4ra00491d)

## Supporting Information

Access to C(sp<sup>3</sup>) borylated and silylated cyclic molecules: Hydrogenation of corresponding cycloarenes and heteroarenes

Arzoo Chhabra, Sabrina Reich, Timothy M. Shannon, Robert E. Maleczka Jr.\*; Milton R. Smith, III

*\*Department of Chemistry, Michigan State University, 578 S Shaw Ln, East Lansing, Michigan, 48824, USA.  
maleczka@chemistry.msu.edu;*

Table of contents

Table S1 and S2 Additives for hydrogenation of **1a**.....S2

<sup>1</sup>H, <sup>13</sup>C, <sup>11</sup>B, <sup>18</sup>F, <sup>29</sup>Si NMR spectra.....S4- S86

**Table S1 Additives for the hydrogenation of 1a by Rh/C<sup>a</sup>**

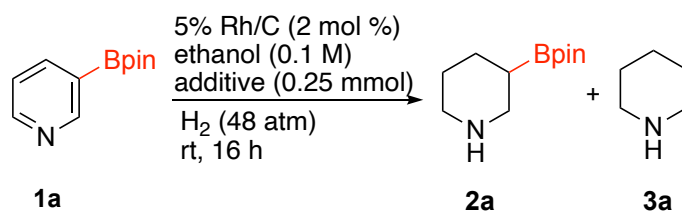

| Entry | Additive<br>(1 equiv)          | Time<br>(h) | 1a<br>(%) | 2a<br>(%) | 1a'<br>(%) |
|-------|--------------------------------|-------------|-----------|-----------|------------|
| 1     | HCl                            | 16          | 75        | 25        | 0          |
| 2     | HCl (dry)                      | 1           | 72        | 28        | 0          |
| 3     | HCl + 1 mL H <sub>2</sub> O    | 1           | 71        | 28        | 1          |
| 4     | MeSO <sub>3</sub> H            | 2           | 63        | 37        | 0          |
| 5     | NH <sub>4</sub> Cl             | 24          | 0         | 70        | 30         |
| 6     | H <sub>3</sub> PO <sub>4</sub> | 2           | 58        | 42        | 0          |
| 7     | 2,6-Dichloropyridine           | 36          | 38        | 62        | 0          |
| 8     | Sulfuric Acid                  | 2           | 39        | 61        | 0          |
| 9     | Triflic acid                   | 2           | 52        | 48        | 0          |

<sup>a</sup>Relative composition determined by <sup>1</sup>H-NMR  
 (4,4,5,5-tetramethyl-1,3,2-dioxaborolan-2-yl)pyridine (0.25 mmol),  
 Additive (0.25 mmol), Hydrogen gas (48 atm), ethanol (2 mL),  
 5% Rh/C (10 mg), rt

**Table S2 Additives for the hydrogenation of 1a by Rh/C<sup>a</sup>**

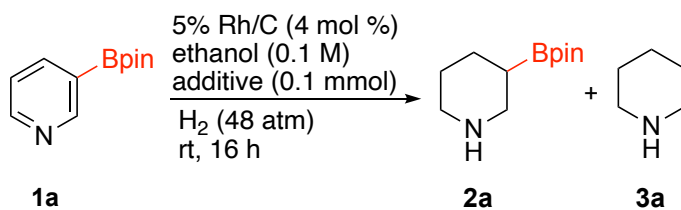

| Entry | Additive (1 equiv)    | 1a (%) | 2a (%) | 1a' |
|-------|-----------------------|--------|--------|-----|
| 1     | Cerium (III) chloride | 0      | 100    | 0   |
| 2     | Magnesium chloride    | 0      | 30     | 70  |
| 3     | Copper sulfate        | 20     | 18     | 62  |
| 4     | Potassium Iodide      | 16     | 42     | 42  |
| 5     | Zinc chloride         | 0      | 15     | 85  |
| 6     | Iron powder (rusted)  | 0      | 15     | 85  |
| 7     | Magnesium sulfate     | 0      | 17     | 83  |
| 8     | Trimethyl borate      | 0      | 11     | 89  |
| 9     | 3Å molecular sieves   | 0      | 19     | 81  |

a) Conversion percentages determined by GCMS by comparing piperidine to starting material. 3-(4,4,5,5-tetramethyl-1,3,2-dioxaborolan-2-yl)pyridine (0.1 mmol), Additive (0.1 mmol), Hydrogen gas (700 psi), Ethanol (1 mL), 5% Rh/C (10 mg), rt.

$^1\text{H}$  NMR (500MHz,  $\text{CDCl}_3$ ) of 2,6-dibromo-4-(4,4,5,5-tetramethyl-1,3,2-dioxaborolan-2-yl)pyridine (1d)

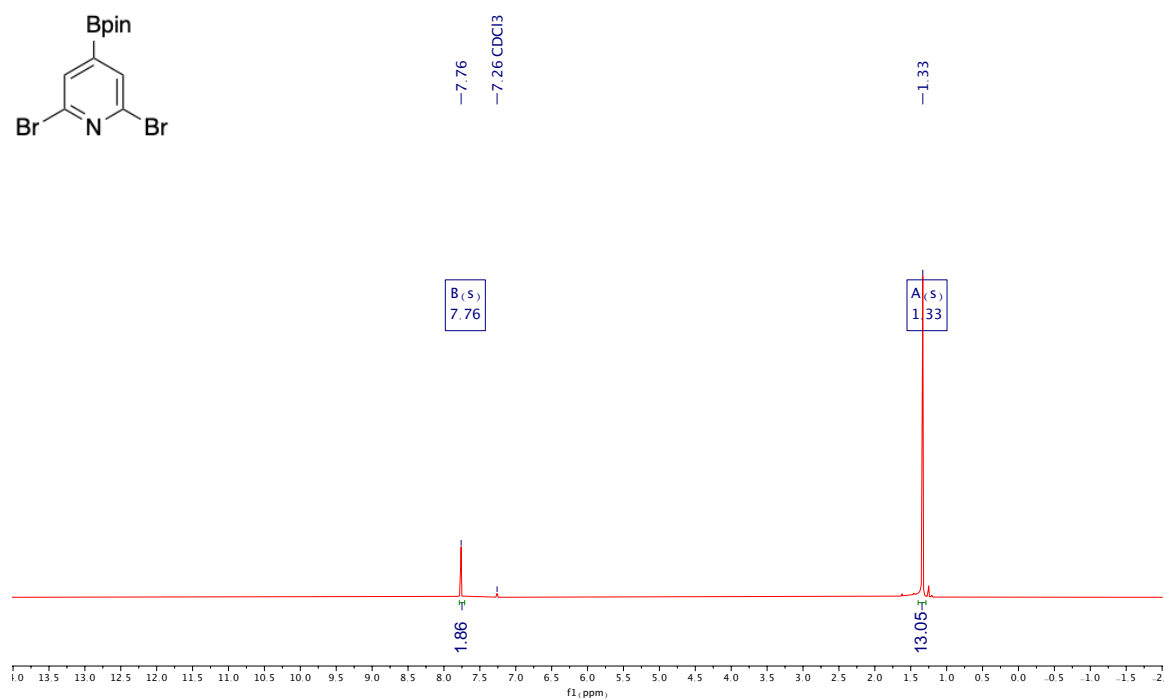

$^{13}\text{C}\{^1\text{H}\}$  (126 MHz,  $\text{CDCl}_3$ ) NMR of 2,6-dibromo-4-(4,4,5,5-tetramethyl-1,3,2-dioxaborolan-2-yl)pyridine (1d)

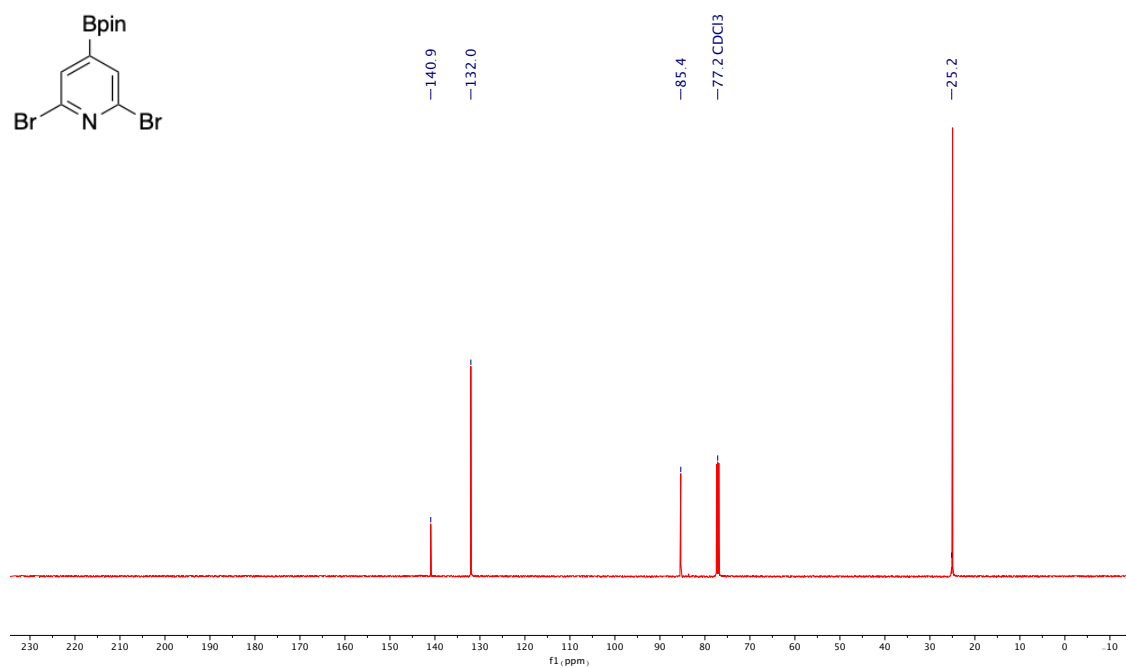

<sup>11</sup>B NMR (160MHz, CDCl<sub>3</sub>) of 2,6-dibromo-4-(4,4,5,5-tetramethyl-1,3,2-dioxaborolan-2-yl)pyridine (1d)

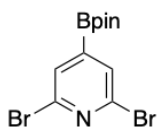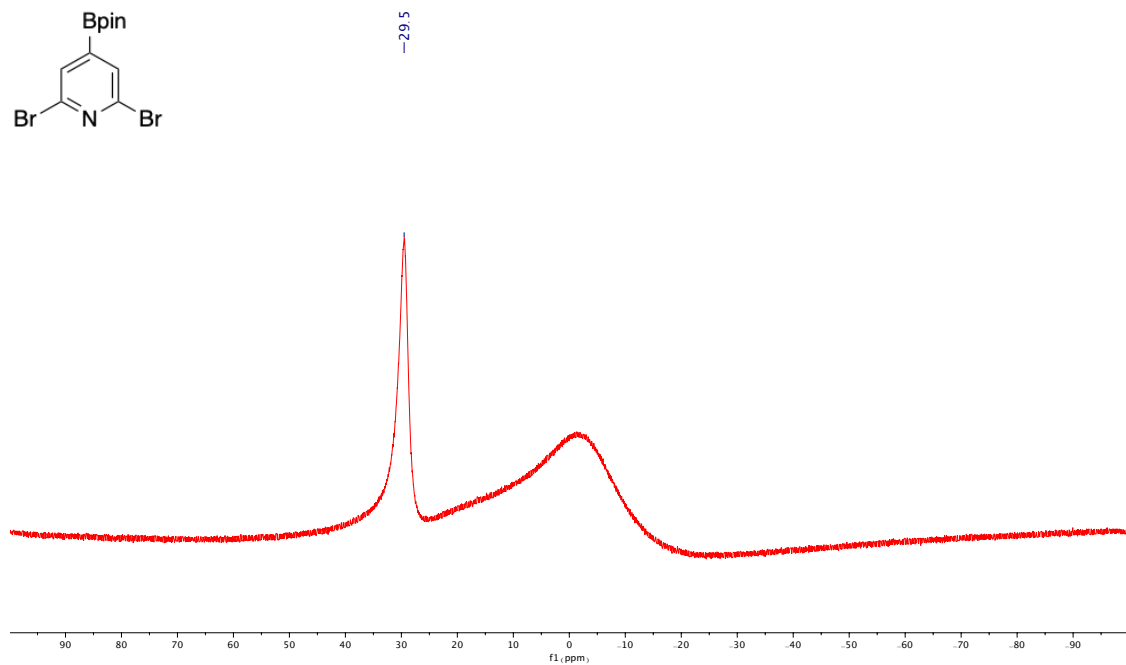

<sup>1</sup>H NMR (500MHz, CDCl<sub>3</sub>) of 2-bromo-6-methyl-4-(4,4,5,5-tetramethyl-1,3,2-dioxaborolan-2-yl)pyridine (1e)

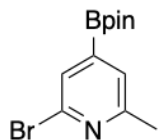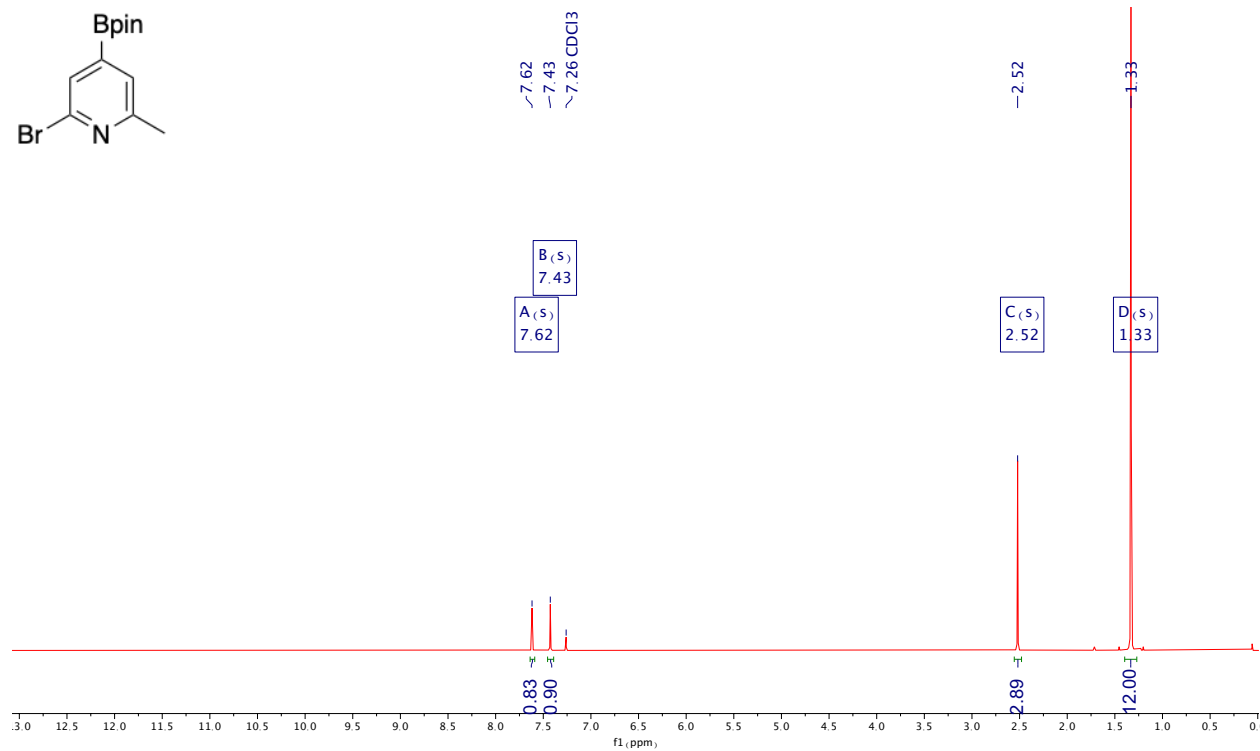

$^{13}\text{C}\{^1\text{H}\}$  (126 MHz,  $\text{CDCl}_3$ ) NMR of 2-bromo-6-methyl-4-(4,4,5,5-tetramethyl-1,3,2-dioxaborolan-2-yl)pyridine (1e)

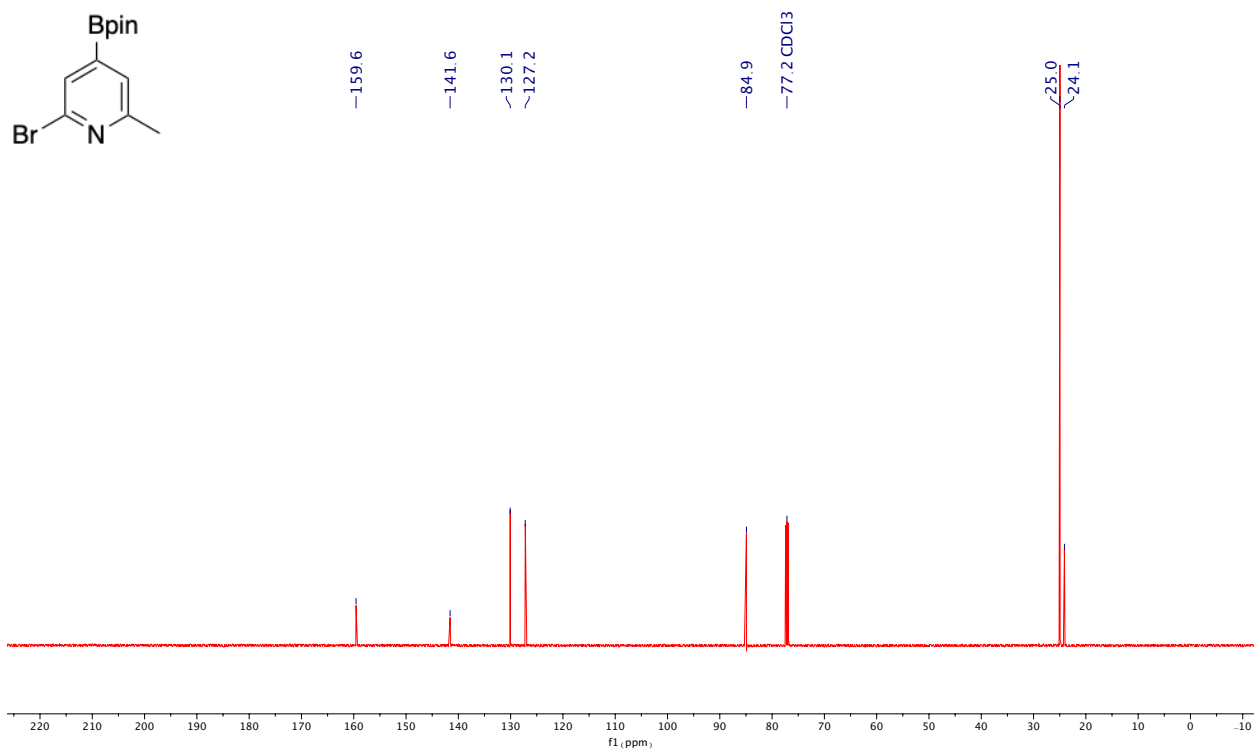

$^{11}\text{B}$  NMR (160 MHz,  $\text{CDCl}_3$ ) of 2-bromo-6-methyl-4-(4,4,5,5-tetramethyl-1,3,2-dioxaborolan-2-yl)pyridine (1e)

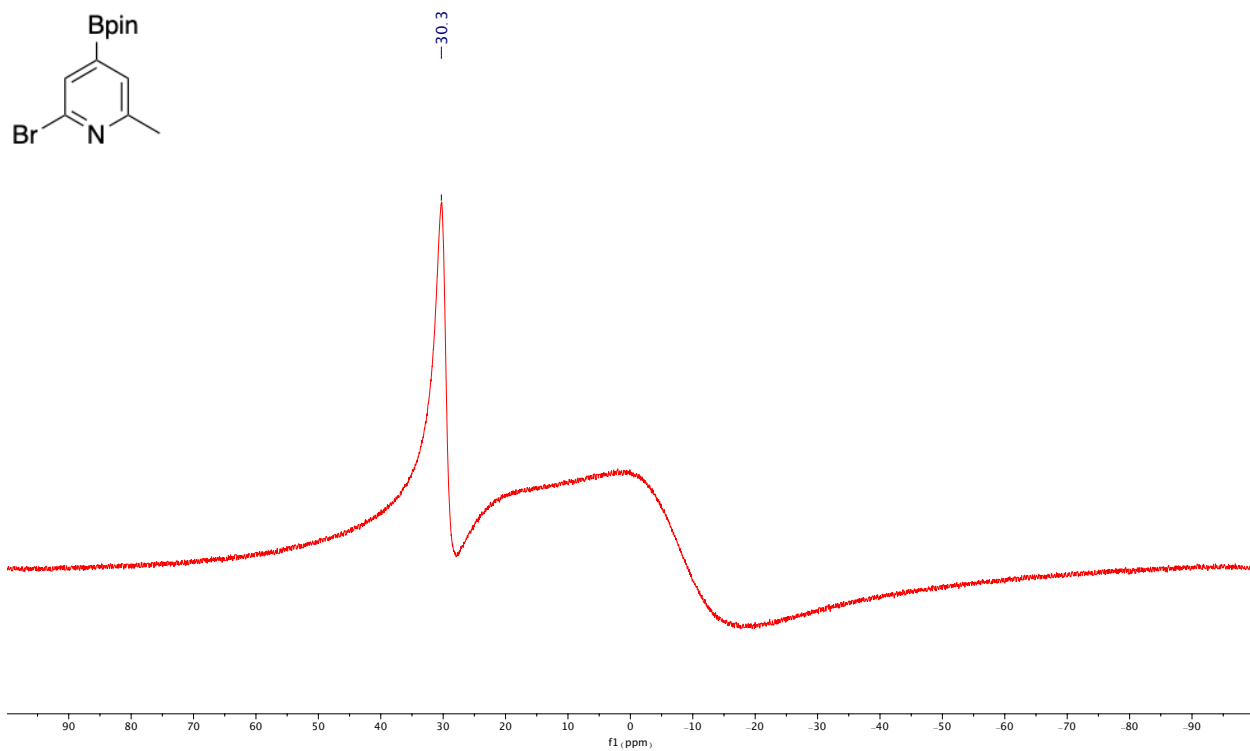

$^1\text{H}$  NMR (500MHz,  $\text{CDCl}_3$ ) of 2,6-dimethyl-4-(4,4,5,5-tetramethyl-1,3,2-dioxaborolan-2-yl)pyridine (1f)

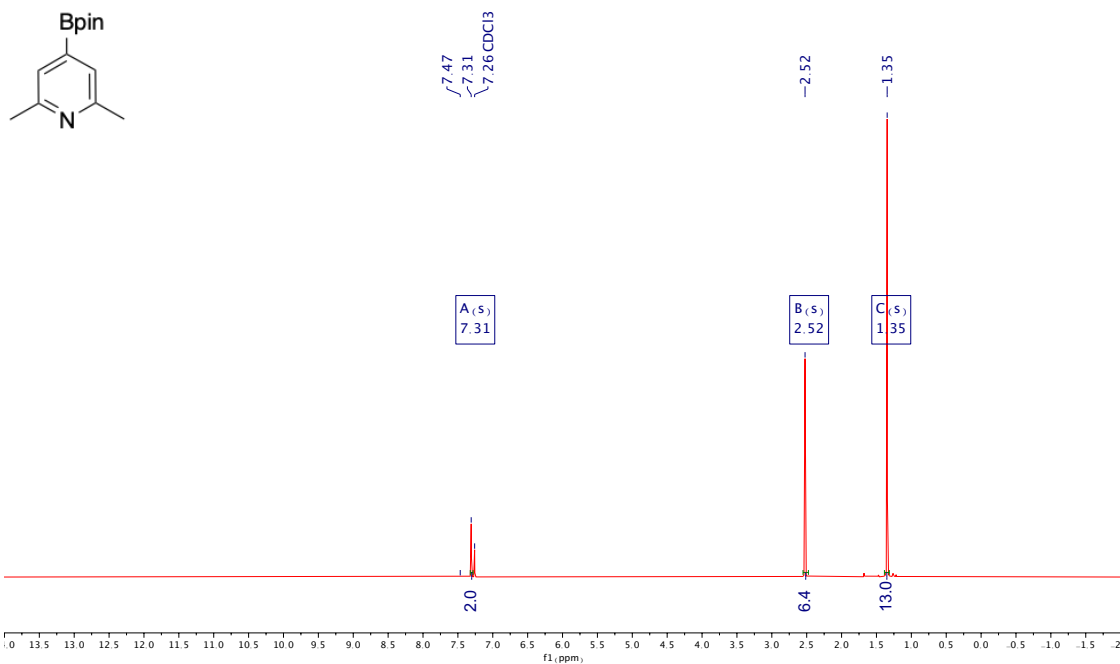

$^{13}\text{C}\{^1\text{H}\}$  (126 MHz,  $\text{CDCl}_3$ ) NMR of 2,6-dimethyl-4-(4,4,5,5-tetramethyl-1,3,2-dioxaborolan-2-yl)pyridine (1f)

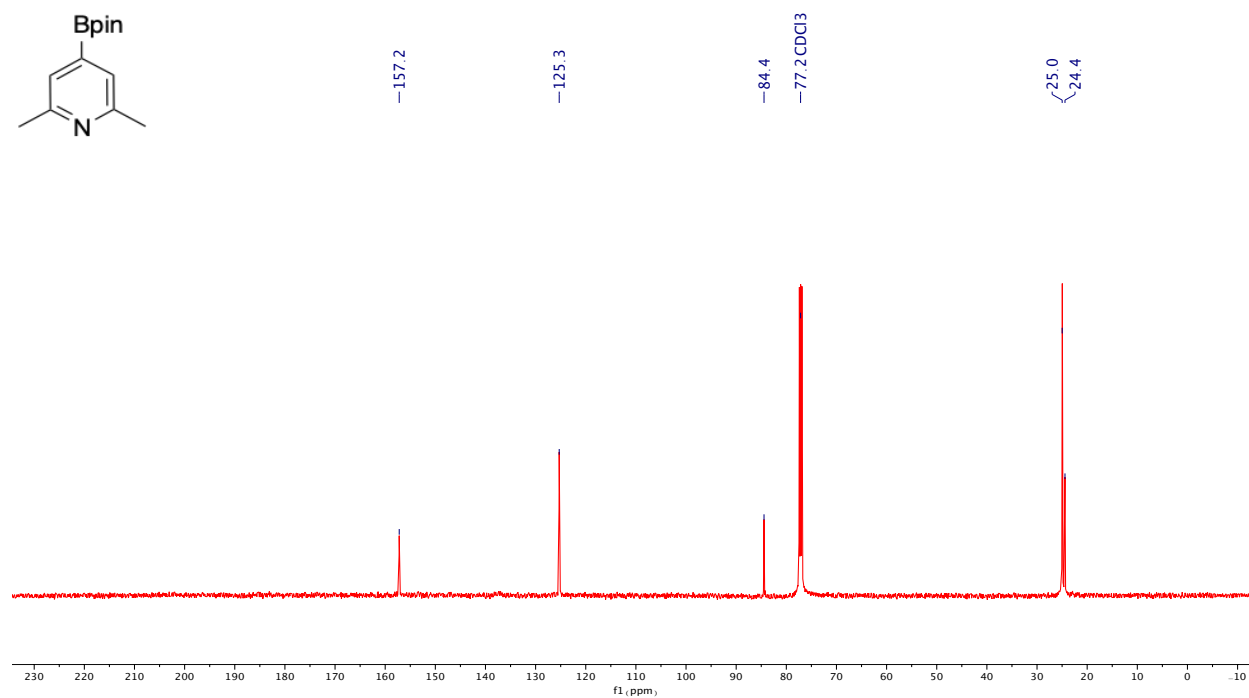

$^{11}\text{B}$  NMR (160MHz,  $\text{CDCl}_3$ ) of 2,6-dimethyl-4-(4,4,5,5-tetramethyl-1,3,2-dioxaborolan-2-yl)pyridine (1f)

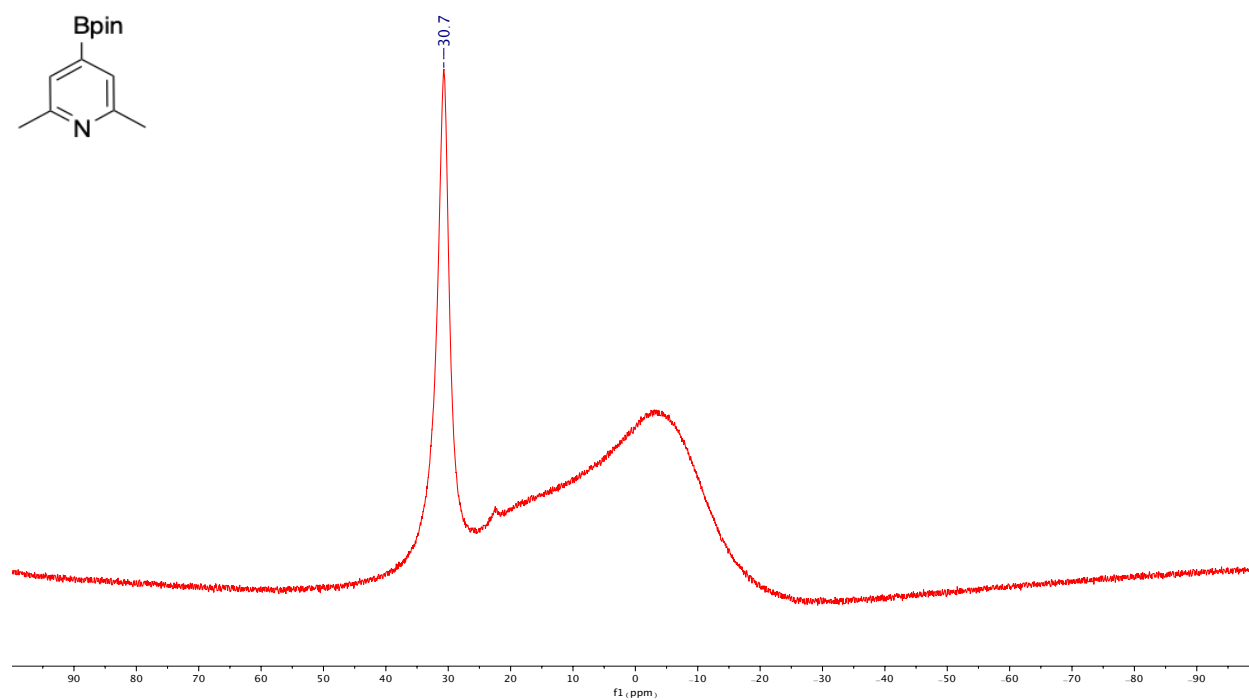

$^1\text{H}$  NMR (500MHz,  $\text{CDCl}_3$ ) of *Tert*-butyl 3-(4,4,5,5-tetramethyl-1,3,2-dioxaborolan-2-yl)-1*H*-pyrrole-1-carboxylate (1g)

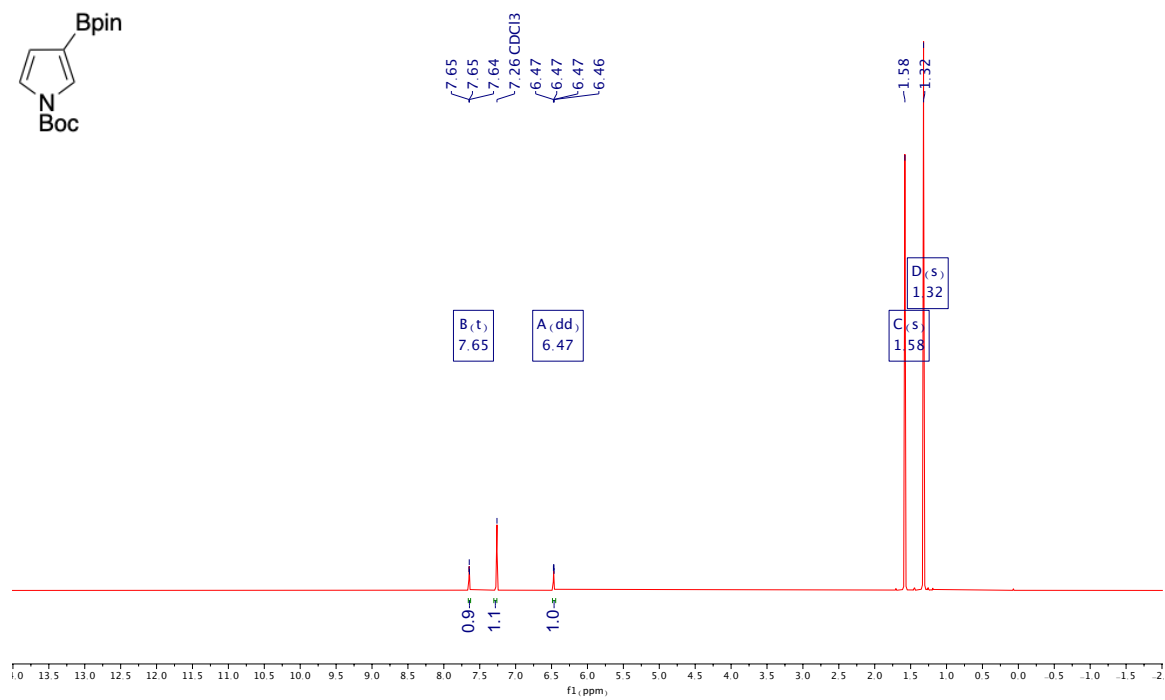

$^{13}\text{C}\{^1\text{H}\}$  (126 MHz,  $\text{CDCl}_3$ ) NMR of *Tert*-butyl 3-(4,4,5,5-tetramethyl-1,3,2-dioxaborolan-2-yl)-1*H*-pyrrole-1-carboxylate (1g)

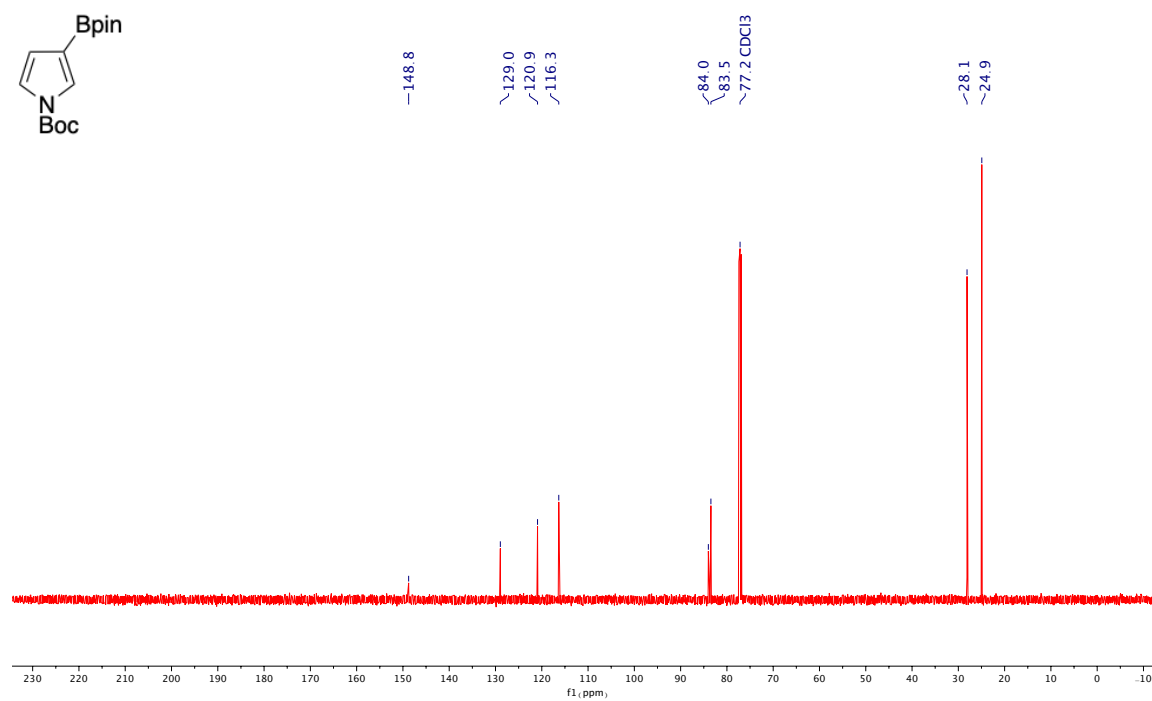

$^{11}\text{B}$  NMR (160 MHz,  $\text{CDCl}_3$ ) of *Tert*-butyl 3-(4,4,5,5-tetramethyl-1,3,2-dioxaborolan-2-yl)-1*H*-pyrrole-1-carboxylate (1g)

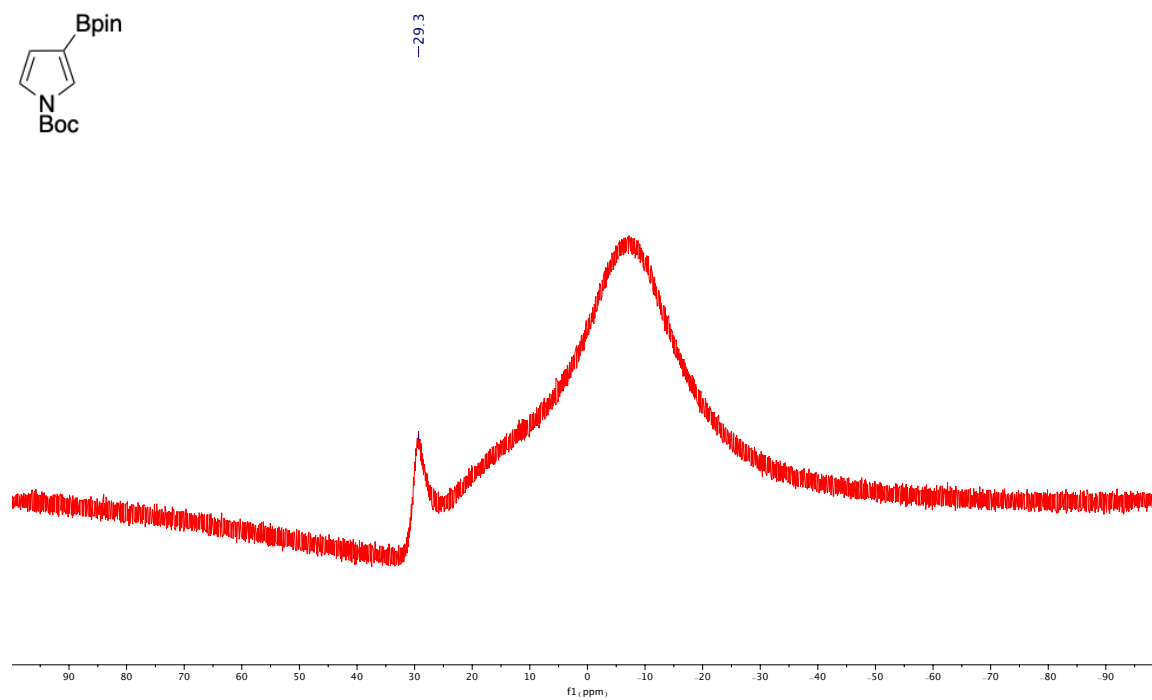

**<sup>1</sup>H NMR (500 MHz, CDCl<sub>3</sub>) of 3-(benzofuran-2-yl)-1,1,1,3,5,5,5-heptamethyltrisiloxane (1z)**

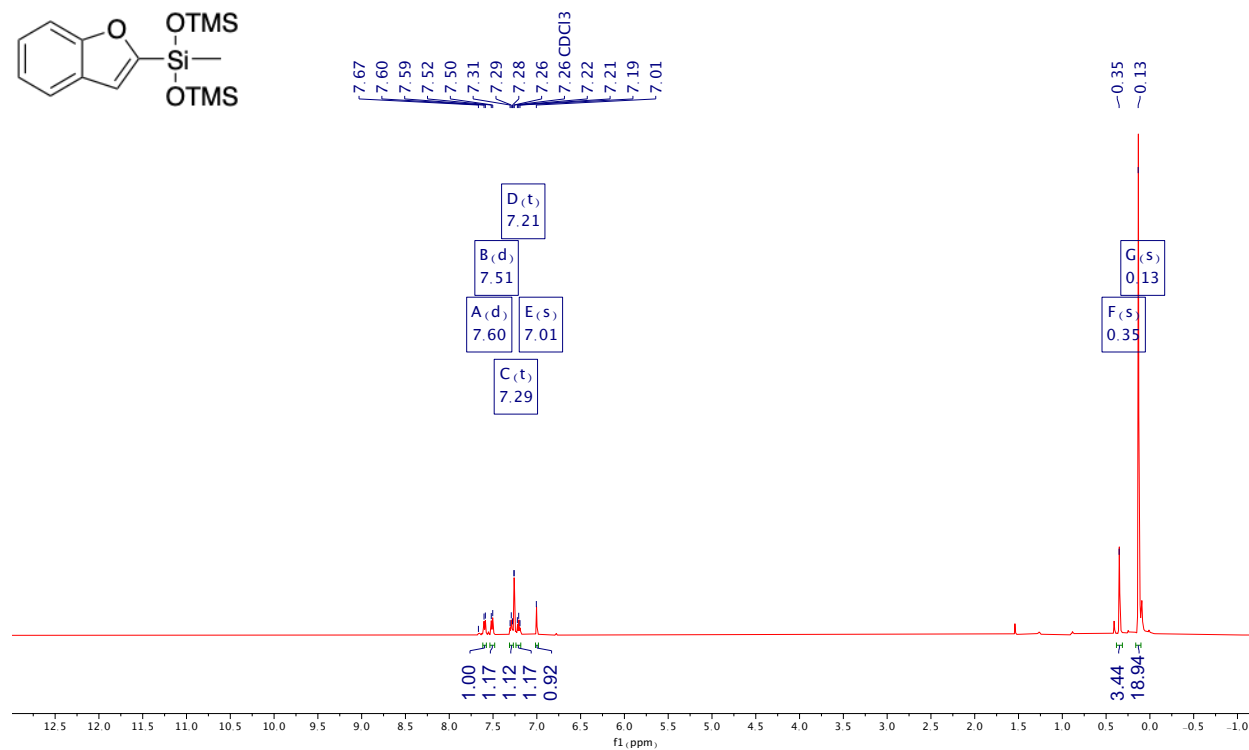

**<sup>13</sup>C{<sup>1</sup>H} (126 MHz, CDCl<sub>3</sub>) NMR of 3-(benzofuran-2-yl)-1,1,1,3,5,5,5-heptamethyltrisiloxane (1z)**

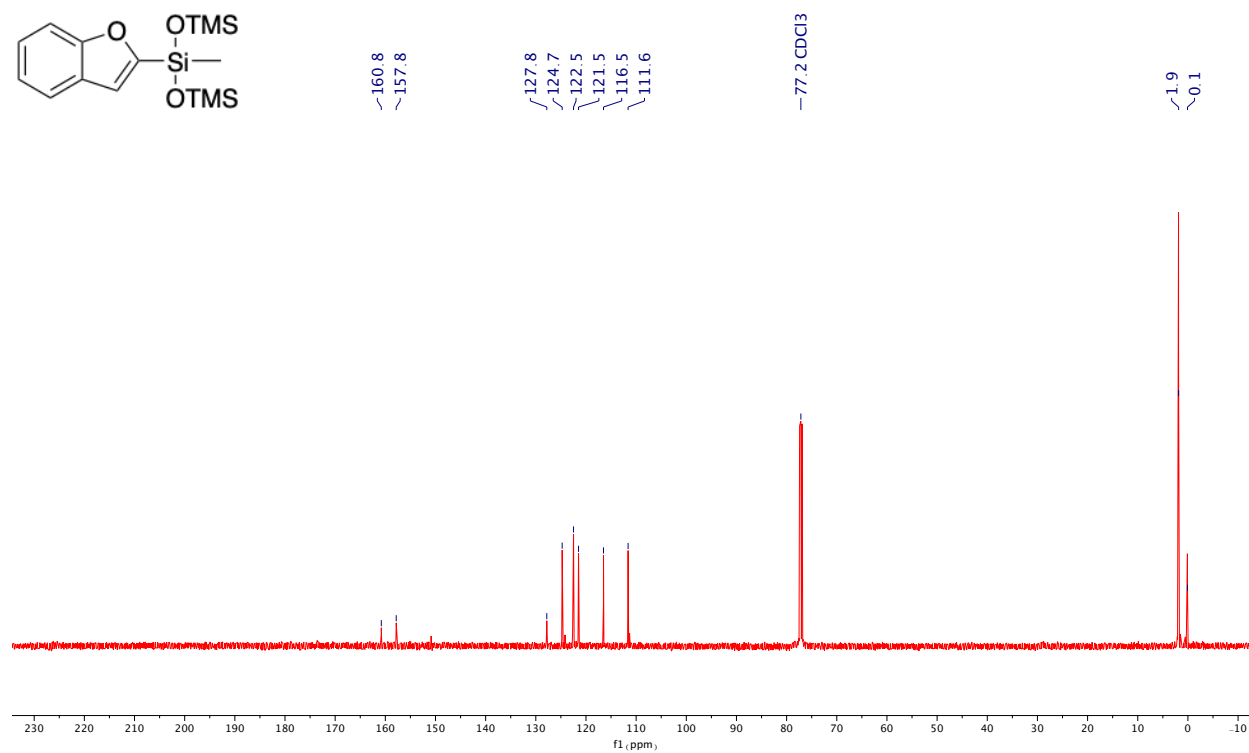

$^{29}\text{Si}$  NMR (99MHz,  $\text{CDCl}_3$ ) of 3-(benzofuran-2-yl)-1,1,1,3,5,5,5-heptamethyltrisiloxane (1z)

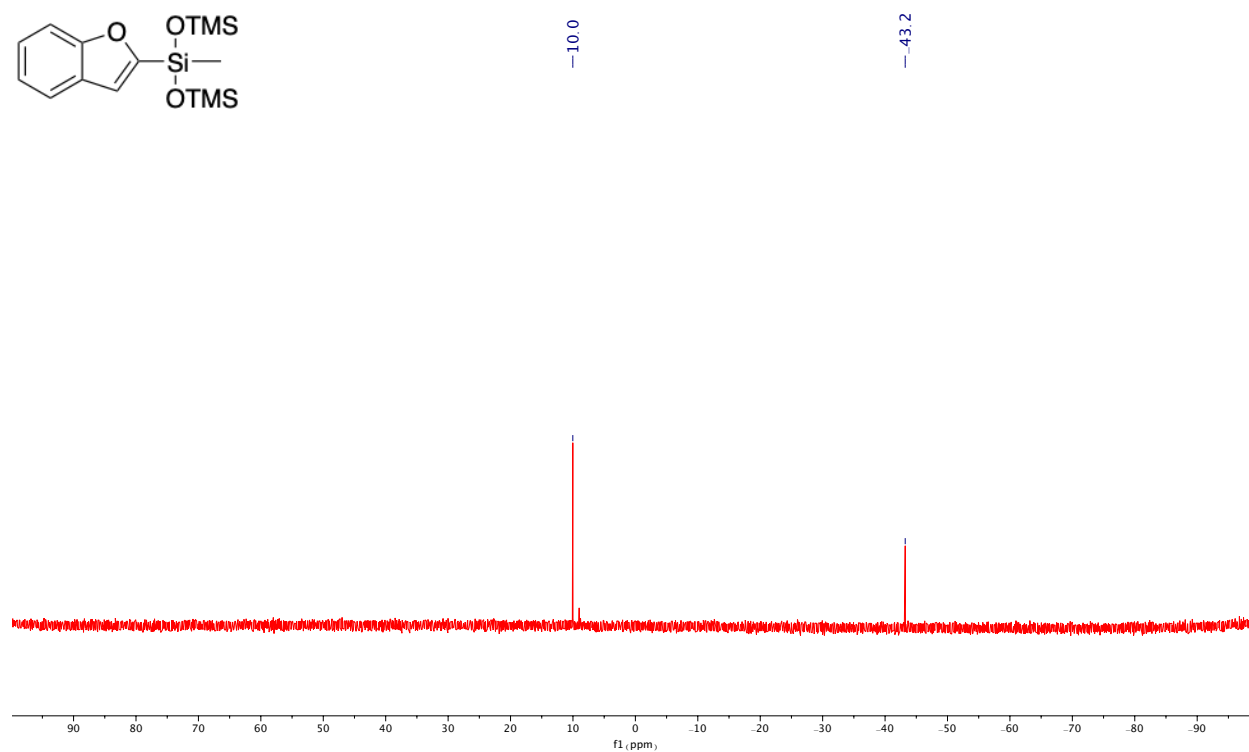

$^1\text{H}$  NMR (500 MHz,  $\text{CDCl}_3$ ) of 2-(benzofuran-7-yl)-4,4,5,5-tetramethyl-1,3,2-dioxaborolane (1j)

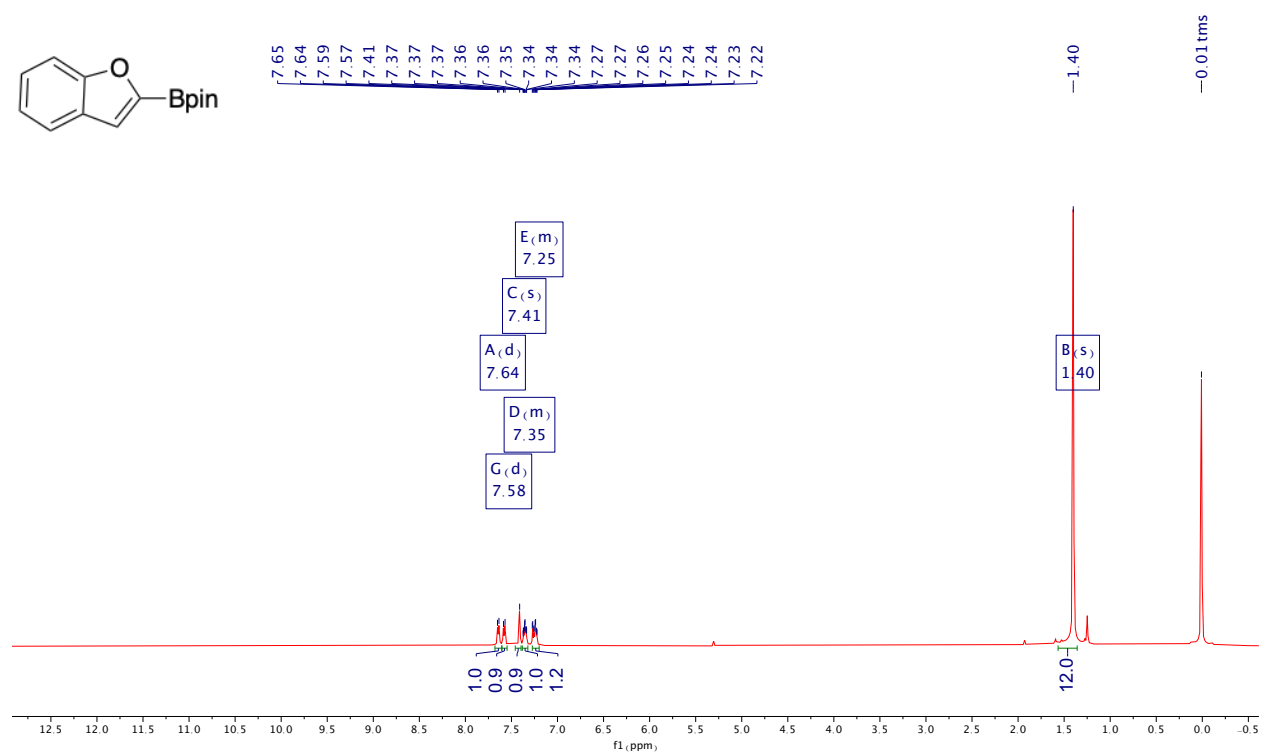

**$^{13}\text{C}\{^1\text{H}\}$  (126 MHz,  $\text{CDCl}_3$ ) NMR of 2-(benzofuran-7-yl)-4,4,5,5-tetramethyl-1,3,2-dioxaborolane (1j)**

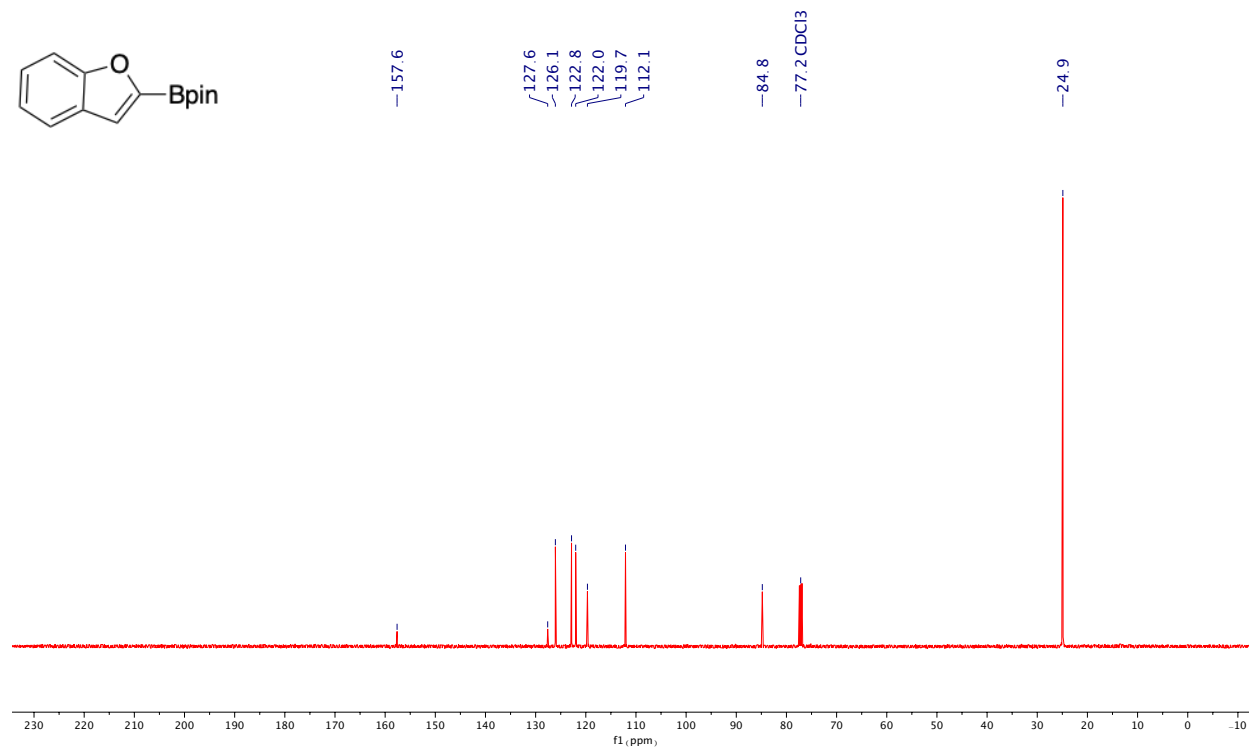

**$^{11}\text{B}$  NMR (160 MHz,  $\text{CDCl}_3$ ) of 2-(benzofuran-7-yl)-4,4,5,5-tetramethyl-1,3,2-dioxaborolane (1j)**

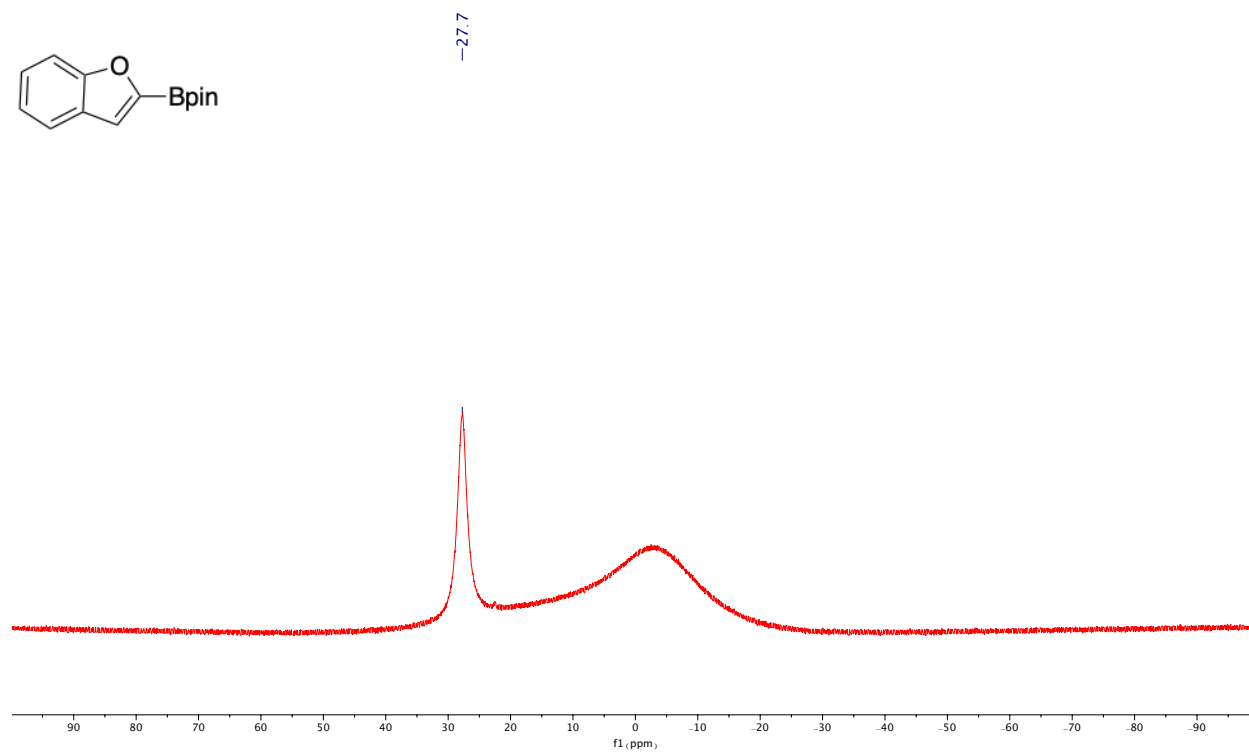

<sup>1</sup>H NMR (500MHz, CDCl<sub>3</sub>) of *Tert*-butyl 2-(4,4,5,5-tetramethyl-1,3,2-dioxaborolan-2-yl)-1*H*-indole-1-carboxylate (11)

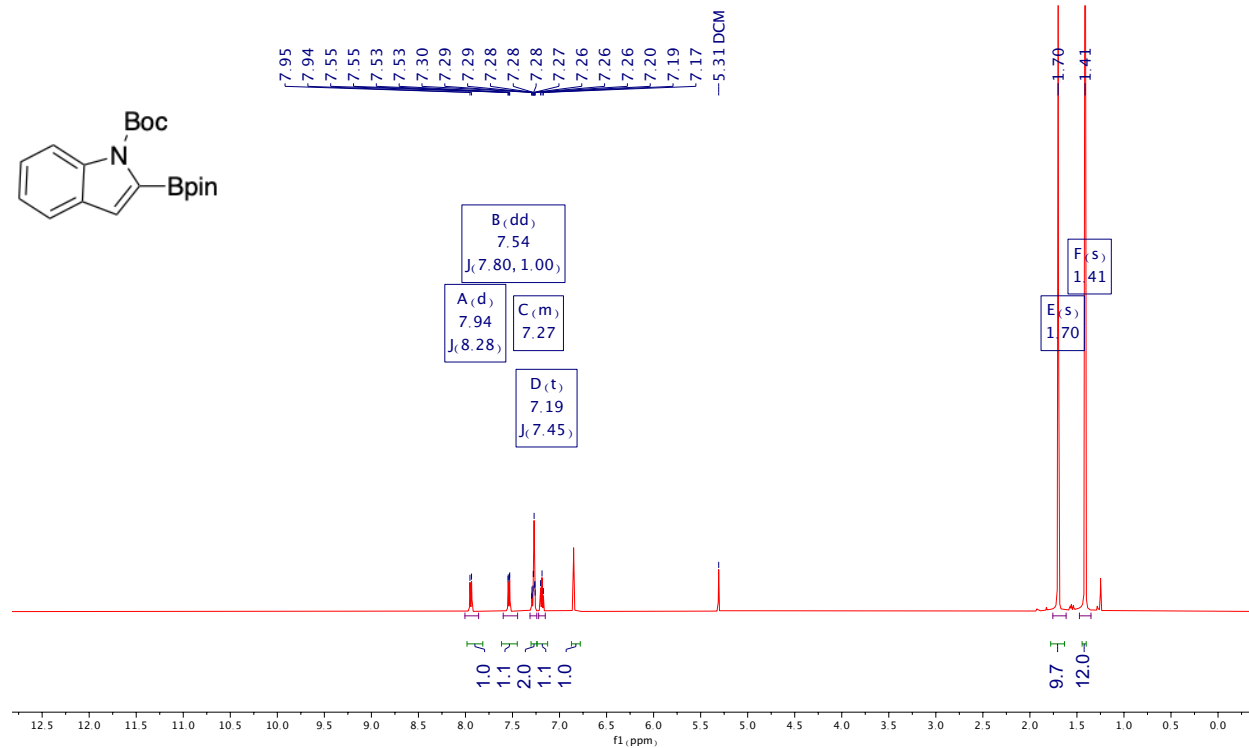

<sup>13</sup>C{<sup>1</sup>H} (126 MHz, CDCl<sub>3</sub>) NMR of *Tert*-butyl 2-(4,4,5,5-tetramethyl-1,3,2-dioxaborolan-2-yl)-1*H*-indole-1-carboxylate (11)

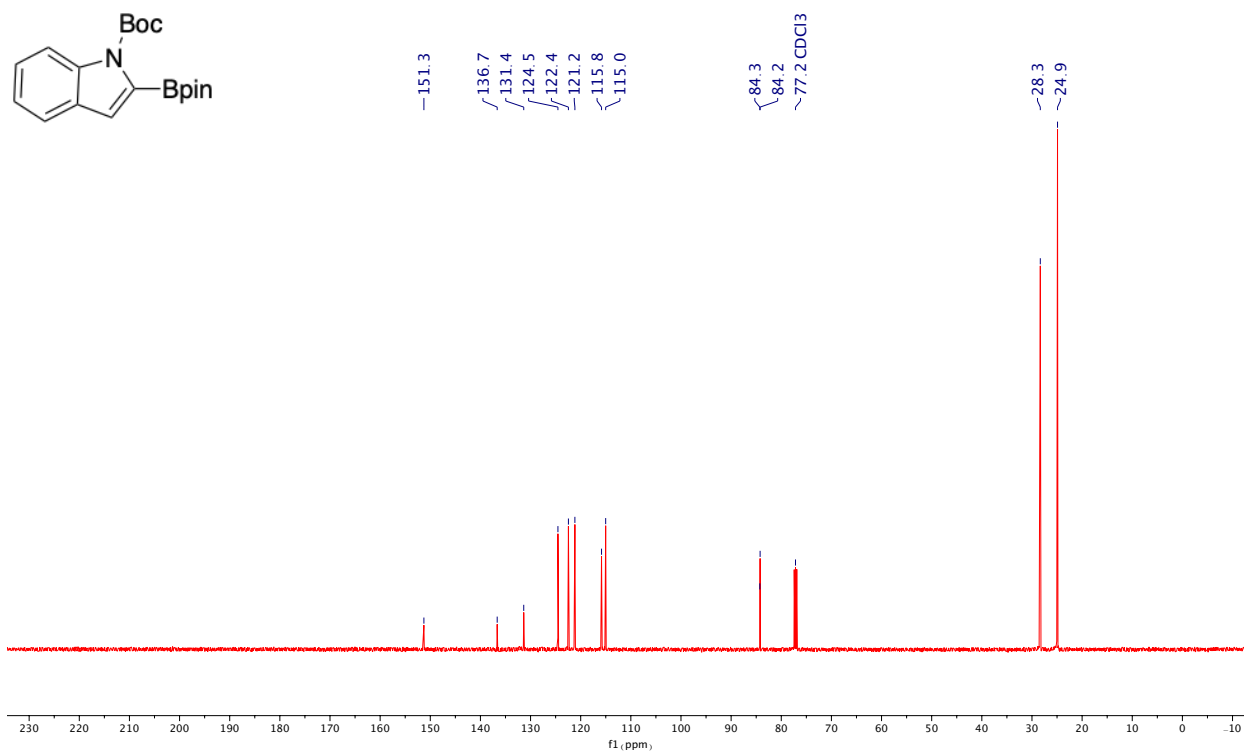

$^{11}\text{B}$  NMR (160 MHz,  $\text{CDCl}_3$ ) of *Tert*-butyl 2-(4,4,5,5-tetramethyl-1,3,2-dioxaborolan-2-yl)-1*H*-indole-1-carboxylate (11)

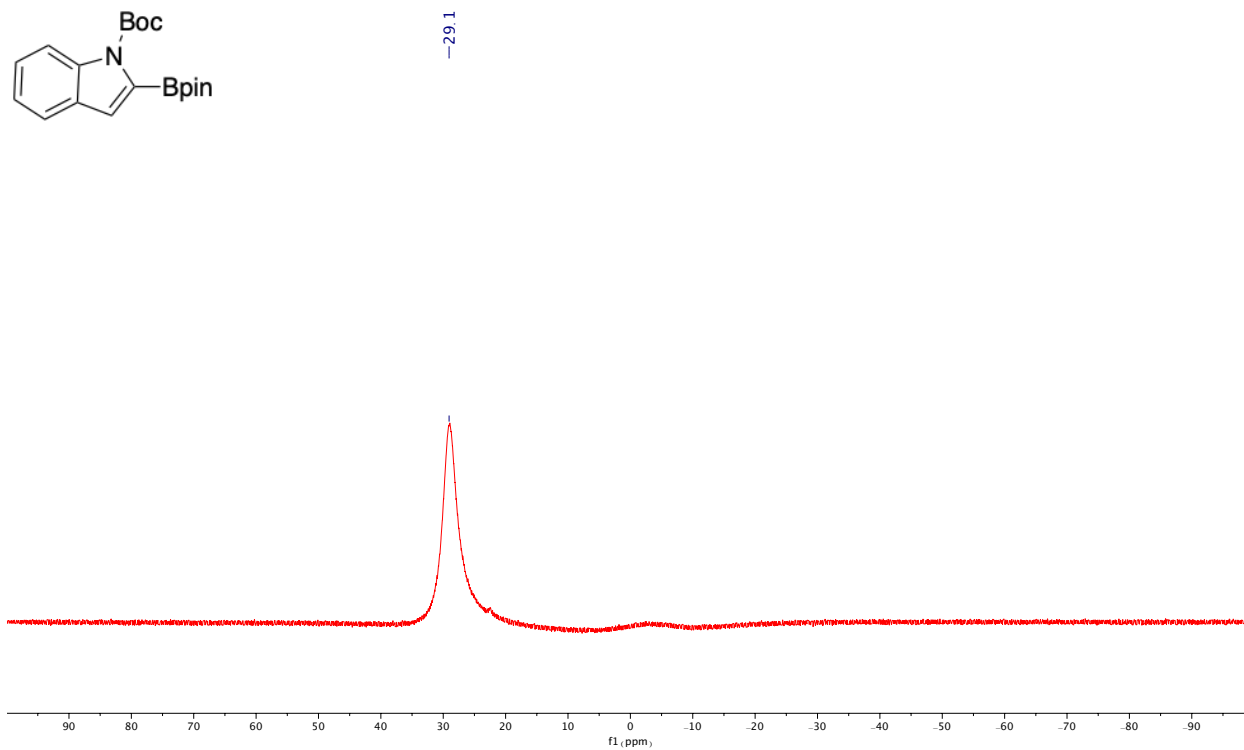

**$^1\text{H}$  NMR (500MHz,  $\text{CDCl}_3$ ) of 3-(4,4,5,5-Tetramethyl-1,3,2-dioxaborolan-2-yl)phenol (1q)**

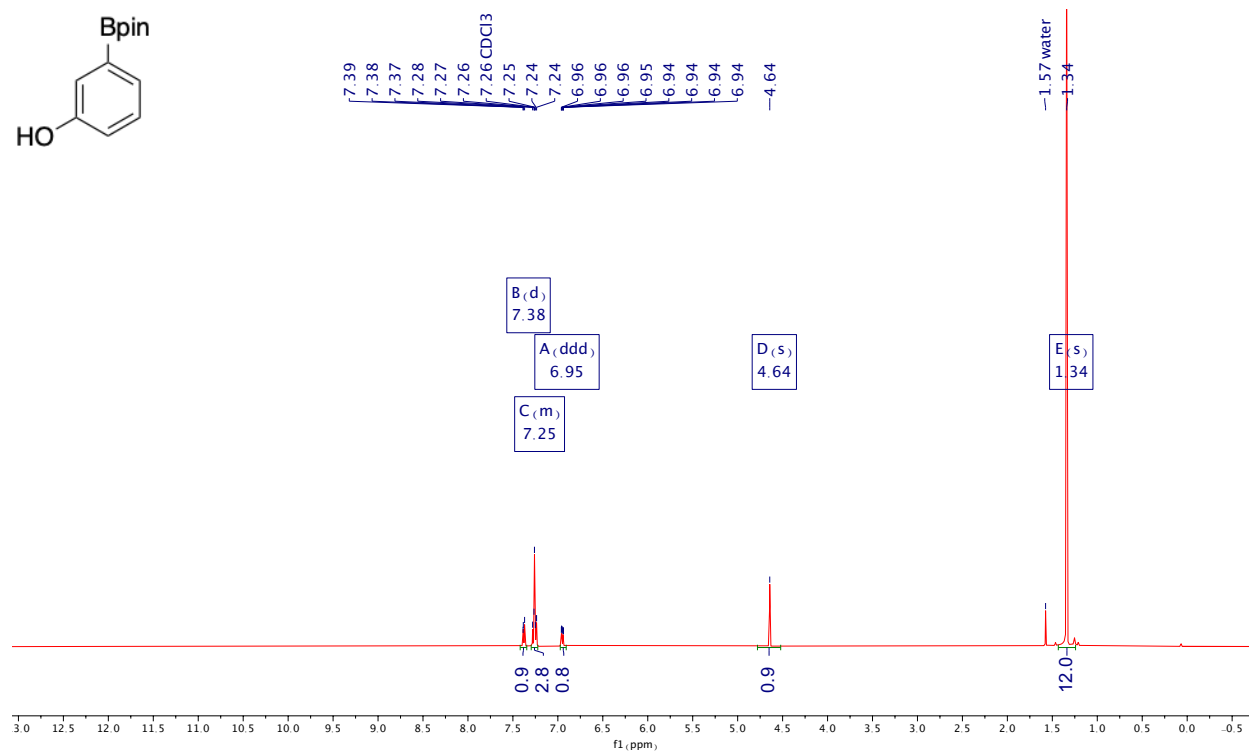

**$^{13}\text{C}\{^1\text{H}\}$  (126 MHz,  $\text{CDCl}_3$ ) NMR of 3-(4,4,5,5-Tetramethyl-1,3,2-dioxaborolan-2-yl)phenol (1q)**

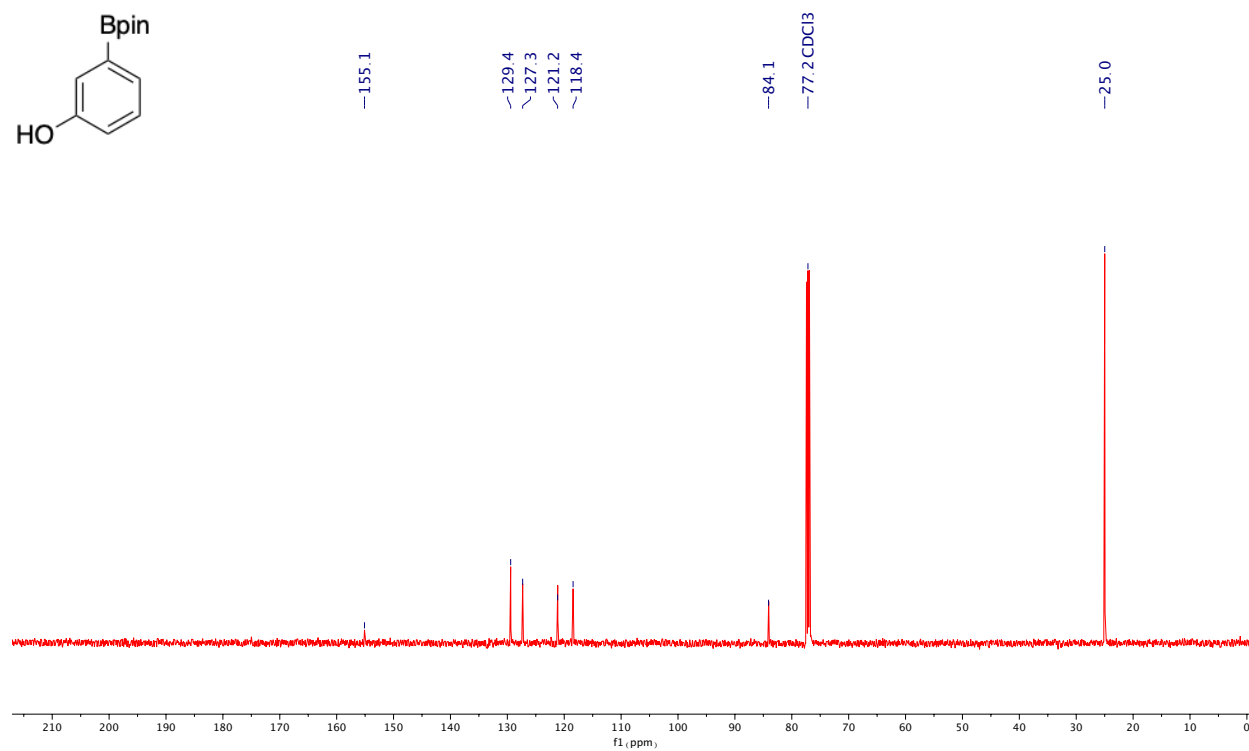

**$^{11}\text{B}$  NMR (160 MHz,  $\text{CDCl}_3$ ) of 3-(4,4,5,5-Tetramethyl-1,3,2-dioxaborolan-2-yl)phenol (1q)**

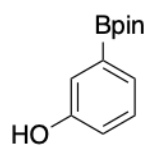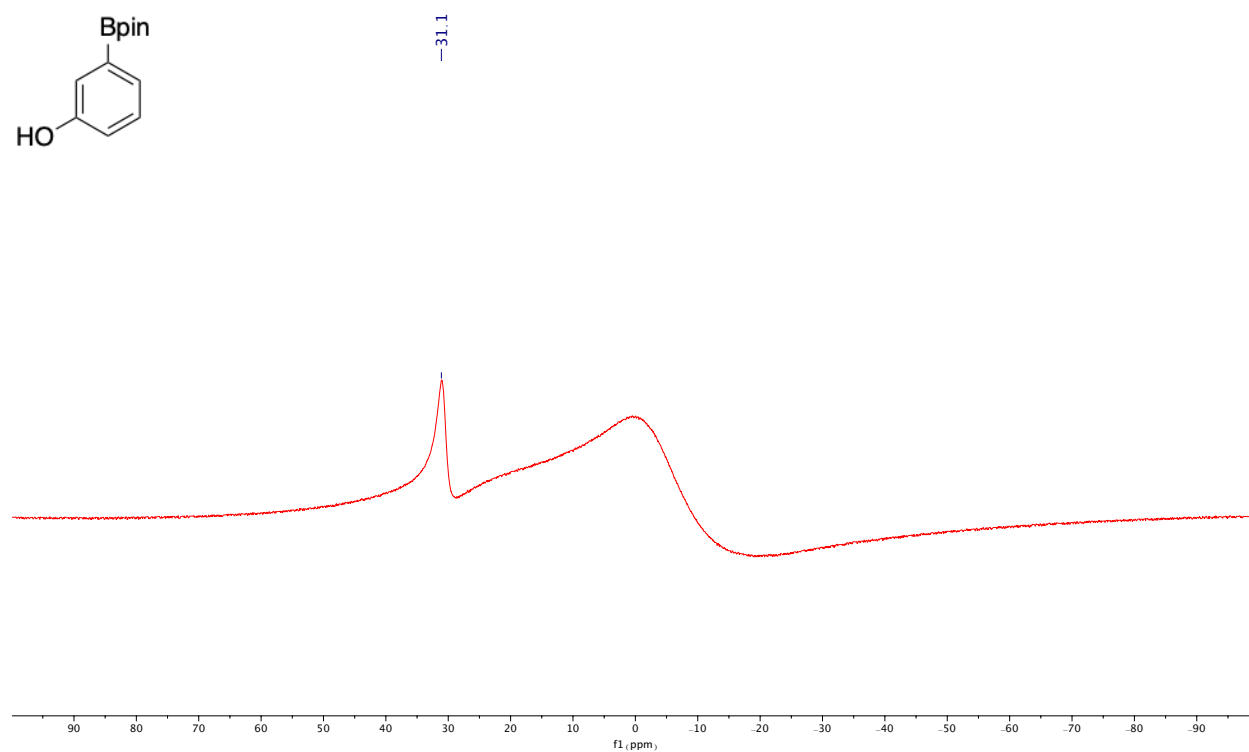

**$^1\text{H}$  NMR (500 MHz,  $\text{CDCl}_3$ ) of trimethyl(3-(4,4,5,5-tetramethyl-1,3,2-dioxaborolan-2-yl)phenyl)silane (1ae)**

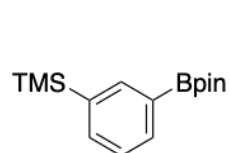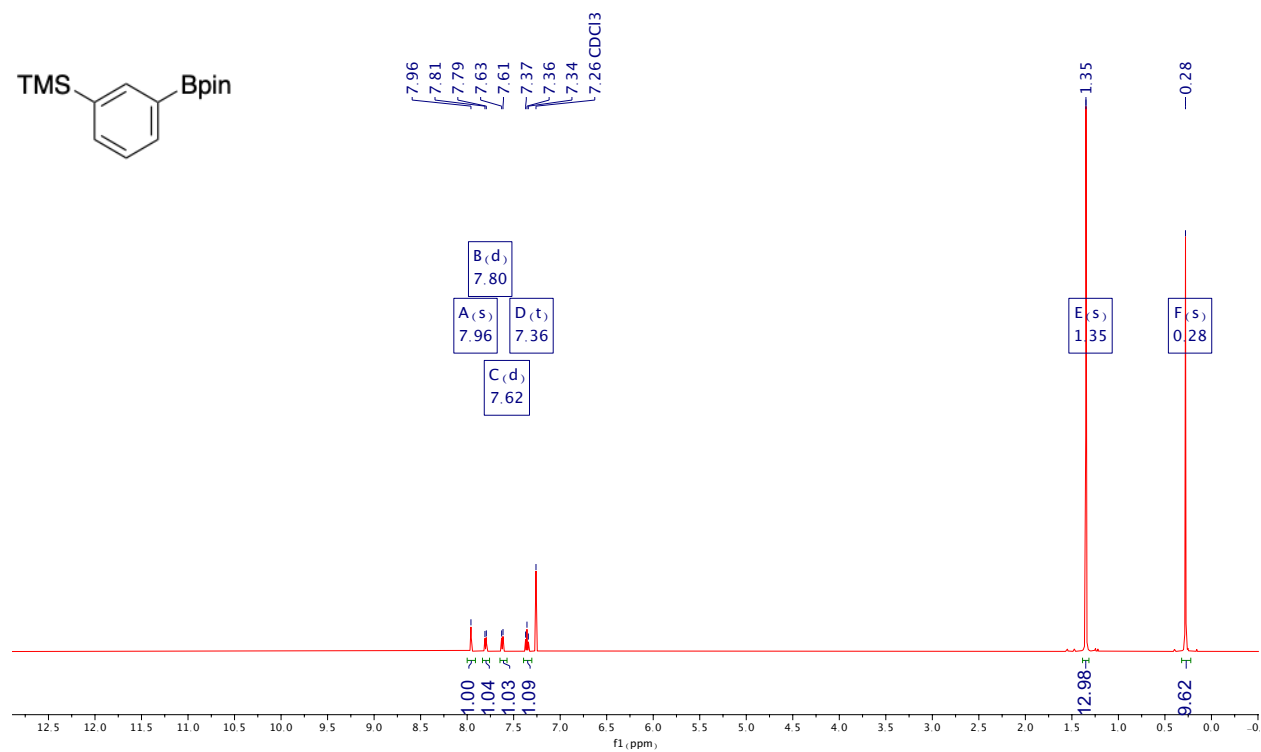

$^{13}\text{C}\{^1\text{H}\}$  (126 MHz,  $\text{CDCl}_3$ ) NMR of trimethyl(3-(4,4,5,5-tetramethyl-1,3,2-dioxaborolan-2-yl)phenyl)silane (**1ae**)

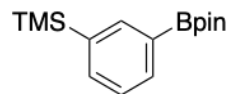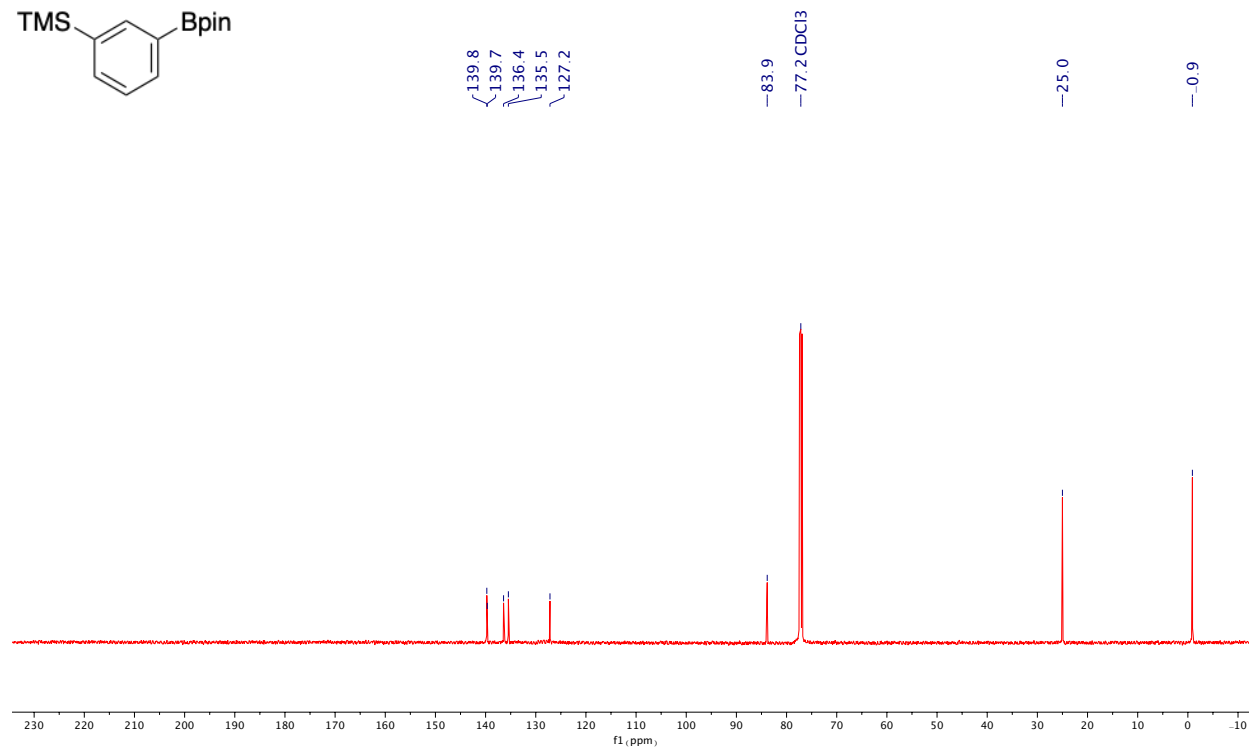

$^{11}\text{B}$  NMR (160 MHz,  $\text{CDCl}_3$ ) of trimethyl(3-(4,4,5,5-tetramethyl-1,3,2-dioxaborolan-2-yl)phenyl)silane (**1ae**)

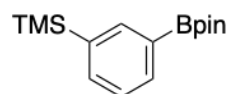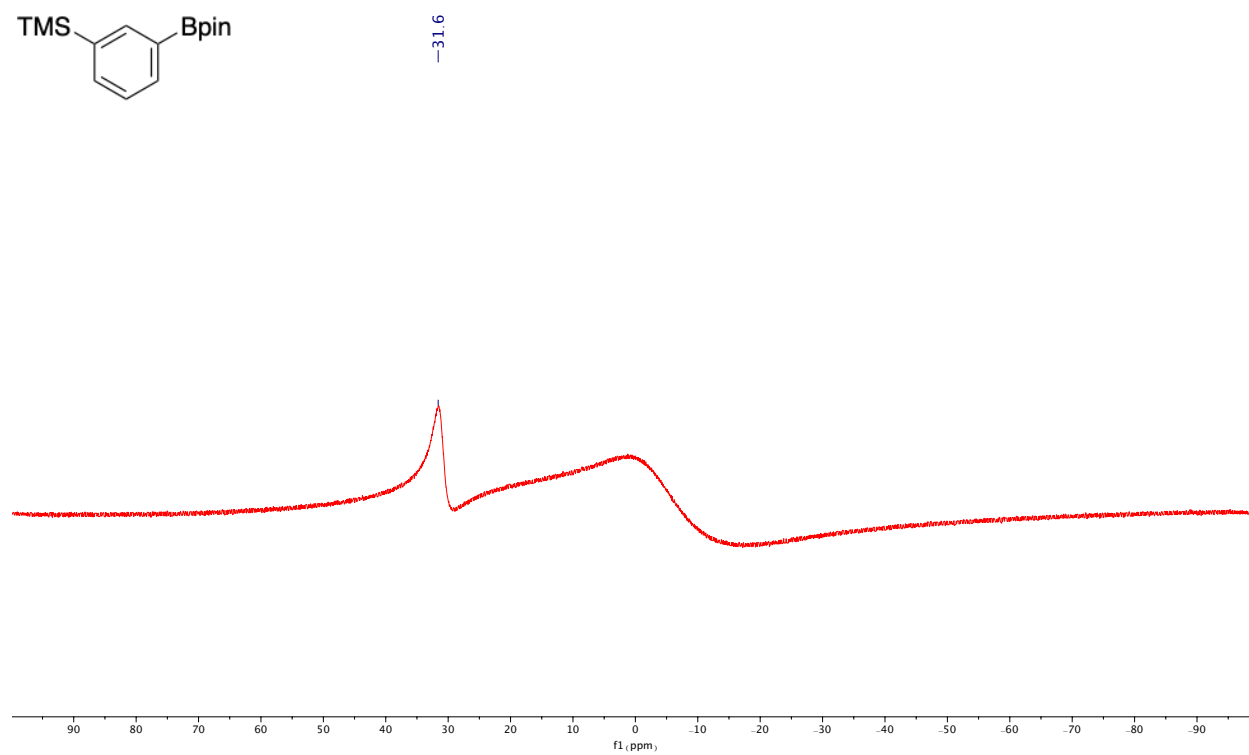

$^{29}\text{Si}$  NMR (99 MHz,  $\text{CDCl}_3$ ) of trimethyl(3-(4,4,5,5-tetramethyl-1,3,2-dioxaborolan-2-yl)phenyl)silane (1ae)

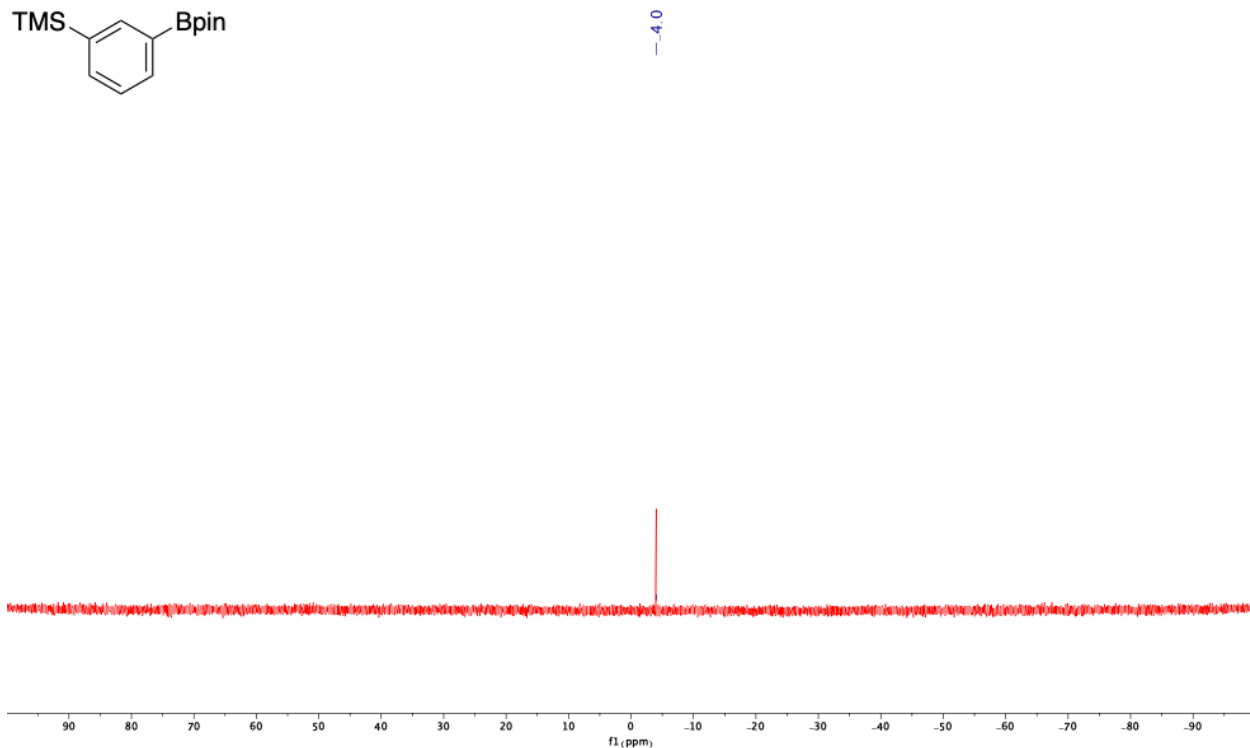

$^1\text{H}$  NMR (500 MHz,  $\text{CDCl}_3$ ) of trimethyl(4-(4,4,5,5-tetramethyl-1,3,2-dioxaborolan-2-yl)phenyl)silane (1af)

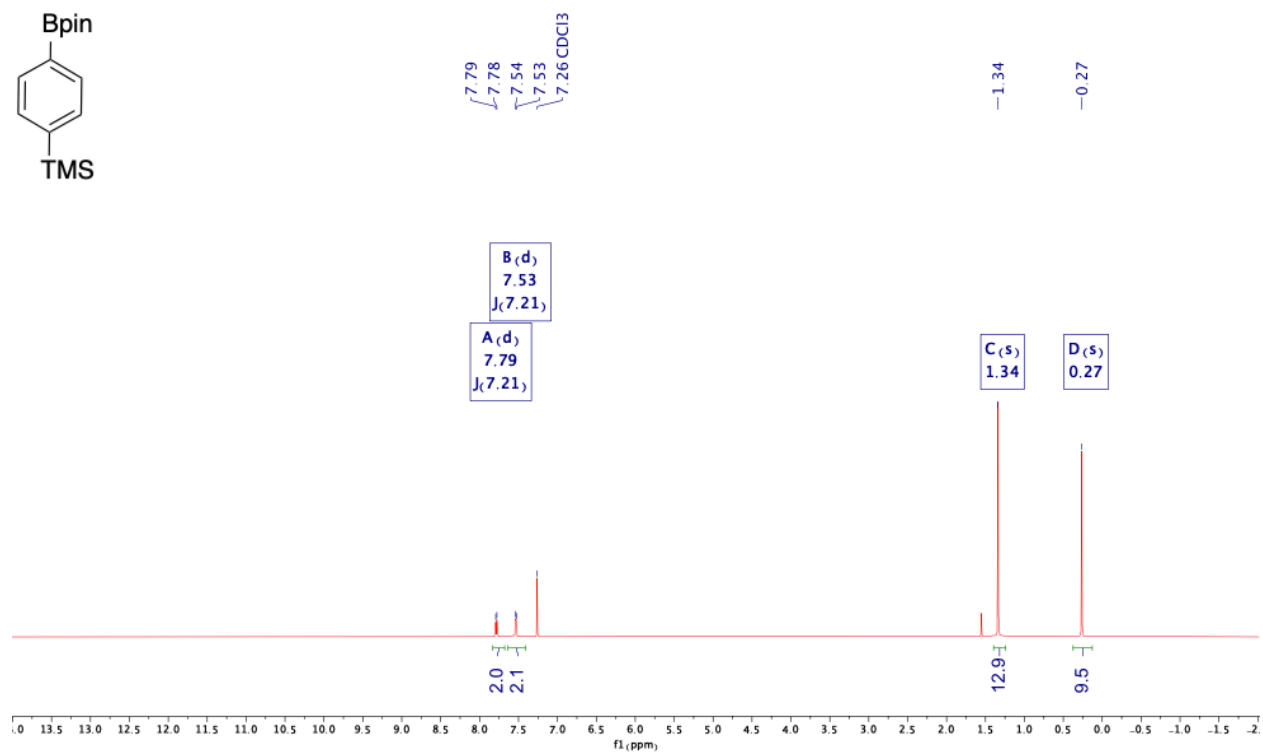

$^{13}\text{C}\{^1\text{H}\}$  (126 MHz,  $\text{CDCl}_3$ ) NMR of trimethyl(4-(4,4,5,5-tetramethyl-1,3,2-dioxaborolan-2-yl)phenyl)silane (1af)

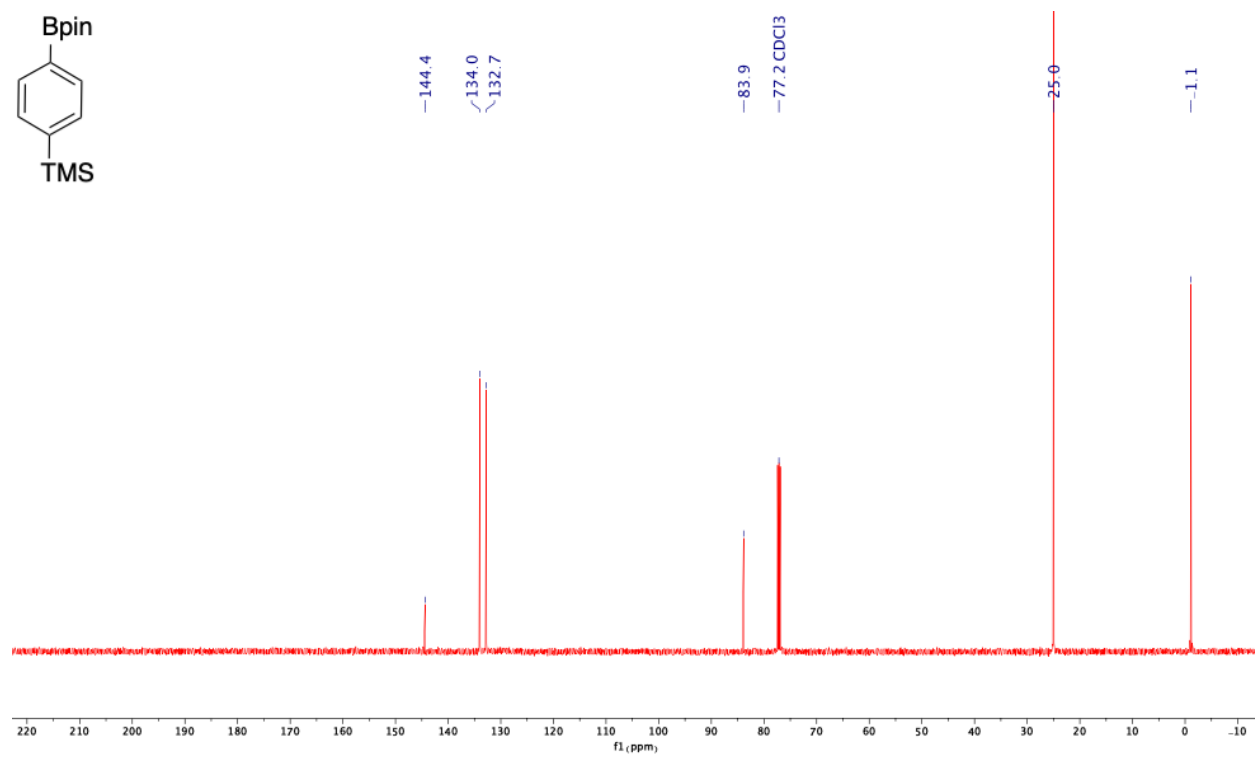

$^{11}\text{B}$  NMR (160 MHz,  $\text{CDCl}_3$ ) of trimethyl(4-(4,4,5,5-tetramethyl-1,3,2-dioxaborolan-2-yl)phenyl)silane (1af)

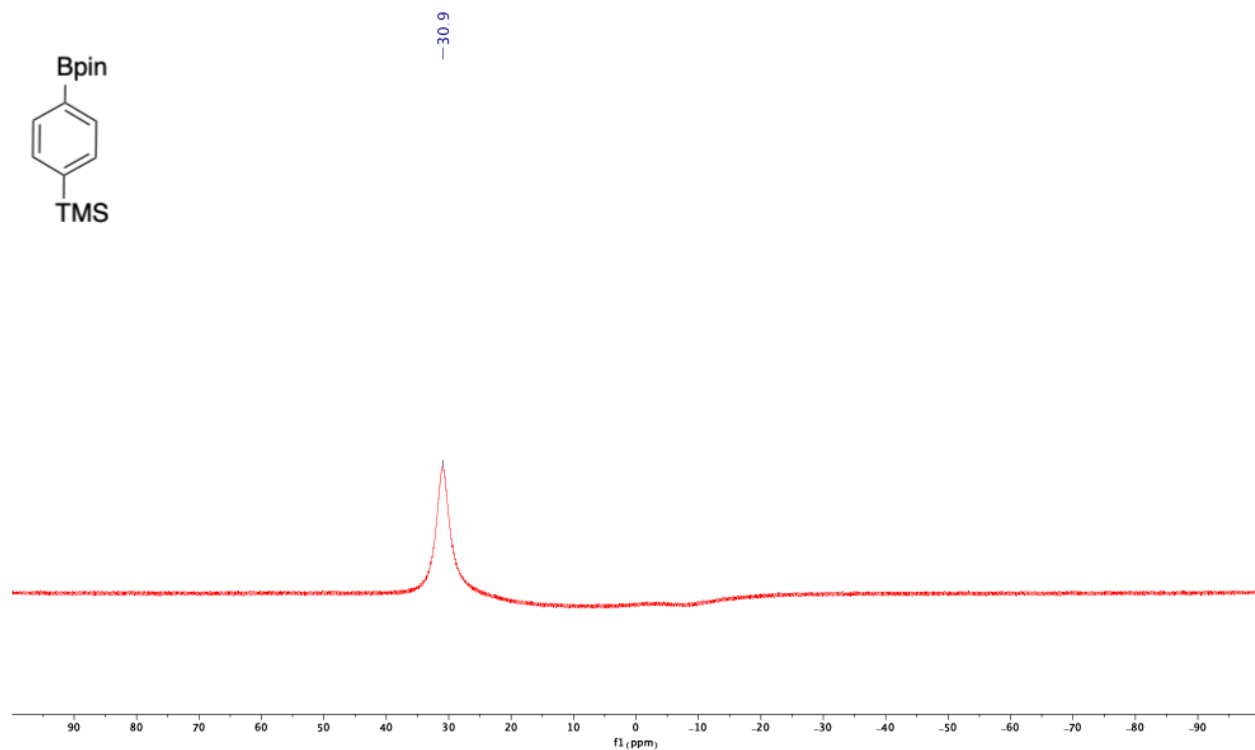

$^{29}\text{Si}$  NMR (99 MHz,  $\text{CDCl}_3$ ) of trimethyl(4-(4,4,5,5-tetramethyl-1,3,2-dioxaborolan-2-yl)phenyl)silane (1af)

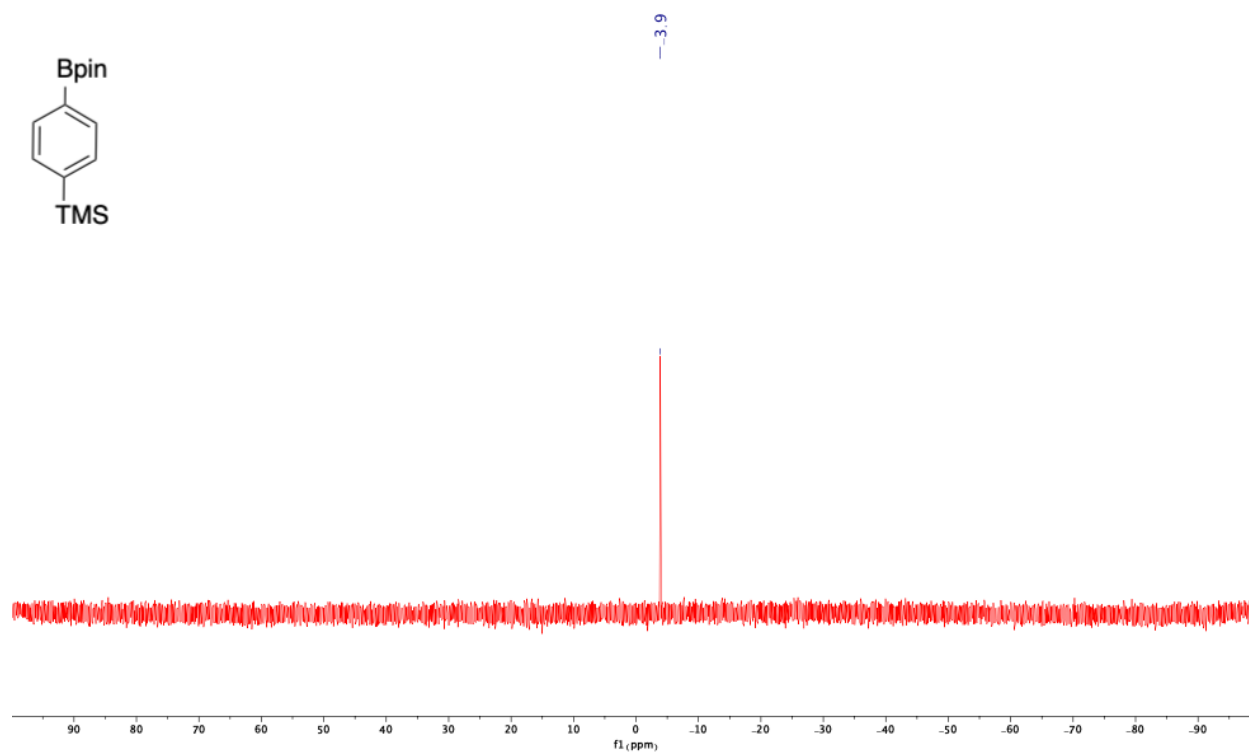

$^1\text{H}$  NMR (500 MHz,  $\text{CDCl}_3$ ) of 2-(dibenzo[*b,d*]furan-4-yl)-4,4,5,5-tetramethyl-1,3,2-dioxaborolane (1k)

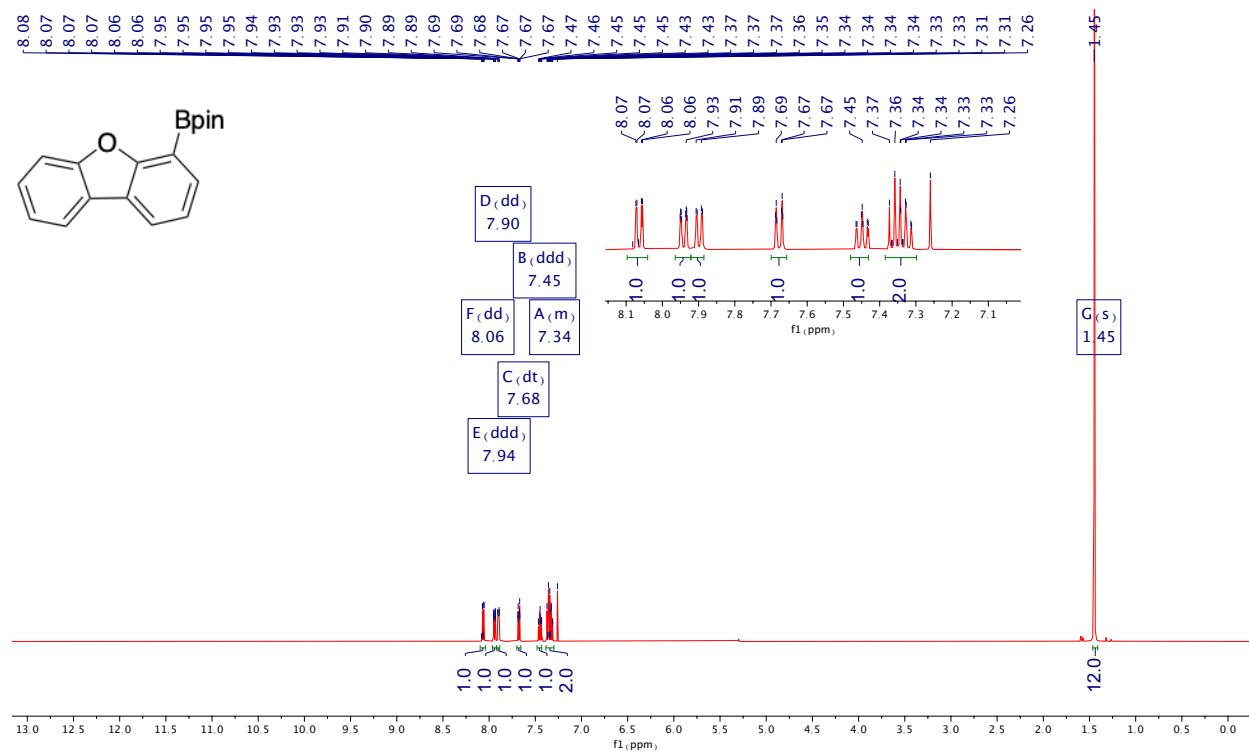

$^{13}\text{C}\{^1\text{H}\}$  (126 MHz,  $\text{CDCl}_3$ ) NMR of 2-(dibenzo[*b,d*]furan-4-yl)-4,4,5,5-tetramethyl-1,3,2-dioxaborolane (1k)

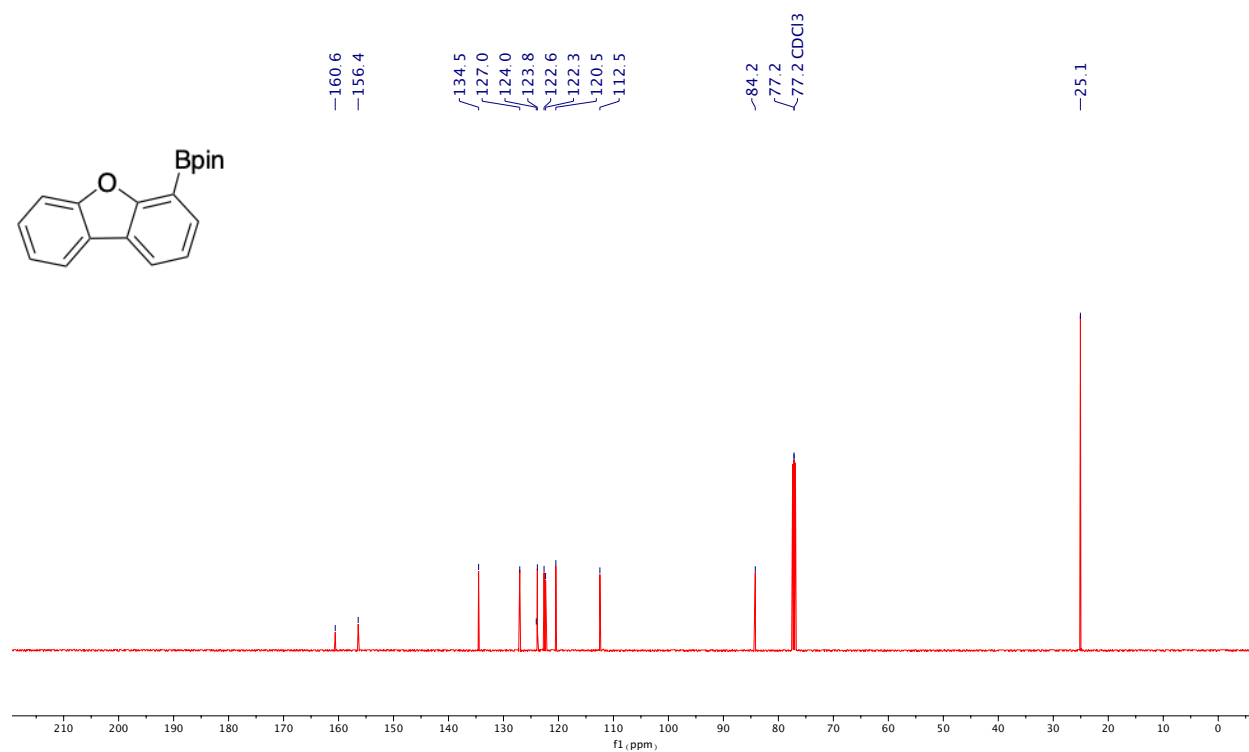

$^{11}\text{B}$  NMR (160 MHz,  $\text{CDCl}_3$ ) of 2-(dibenzo[*b,d*]furan-4-yl)-4,4,5,5-tetramethyl-1,3,2-dioxaborolane (1k)

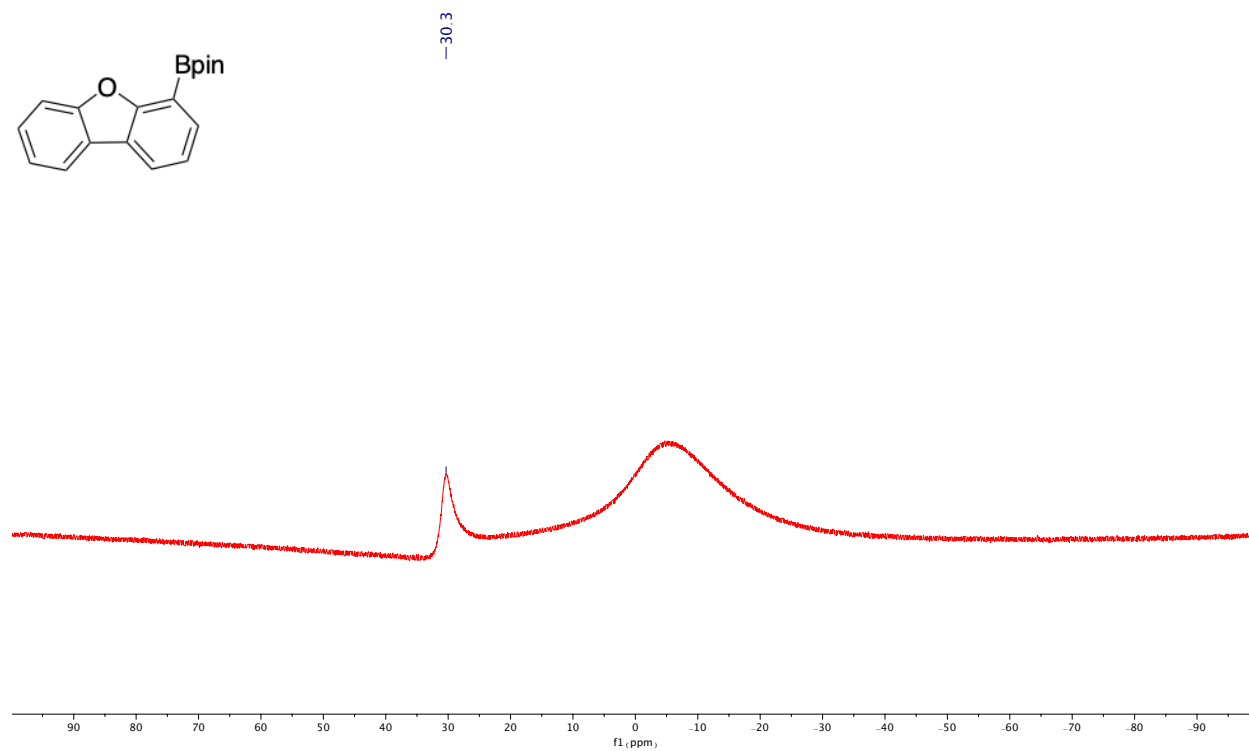

**<sup>1</sup>H NMR (500MHz, CDCl<sub>3</sub>) 2-Chloro-6-(trifluoromethyl)-3-(trimethylsilyl)pyridine (1y)**

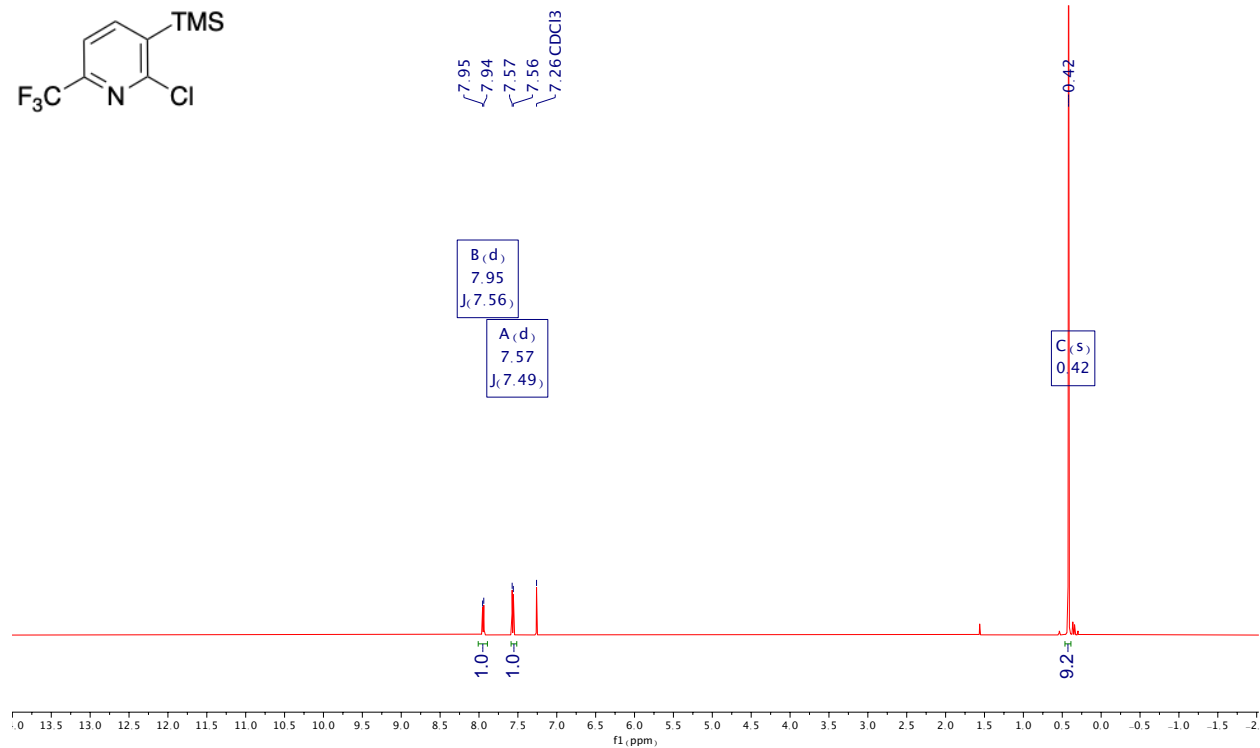

**<sup>13</sup>C{<sup>1</sup>H} (126 MHz, CDCl<sub>3</sub>) NMR of 2-Chloro-6-(trifluoromethyl)-3-(trimethylsilyl)pyridine (1y)**

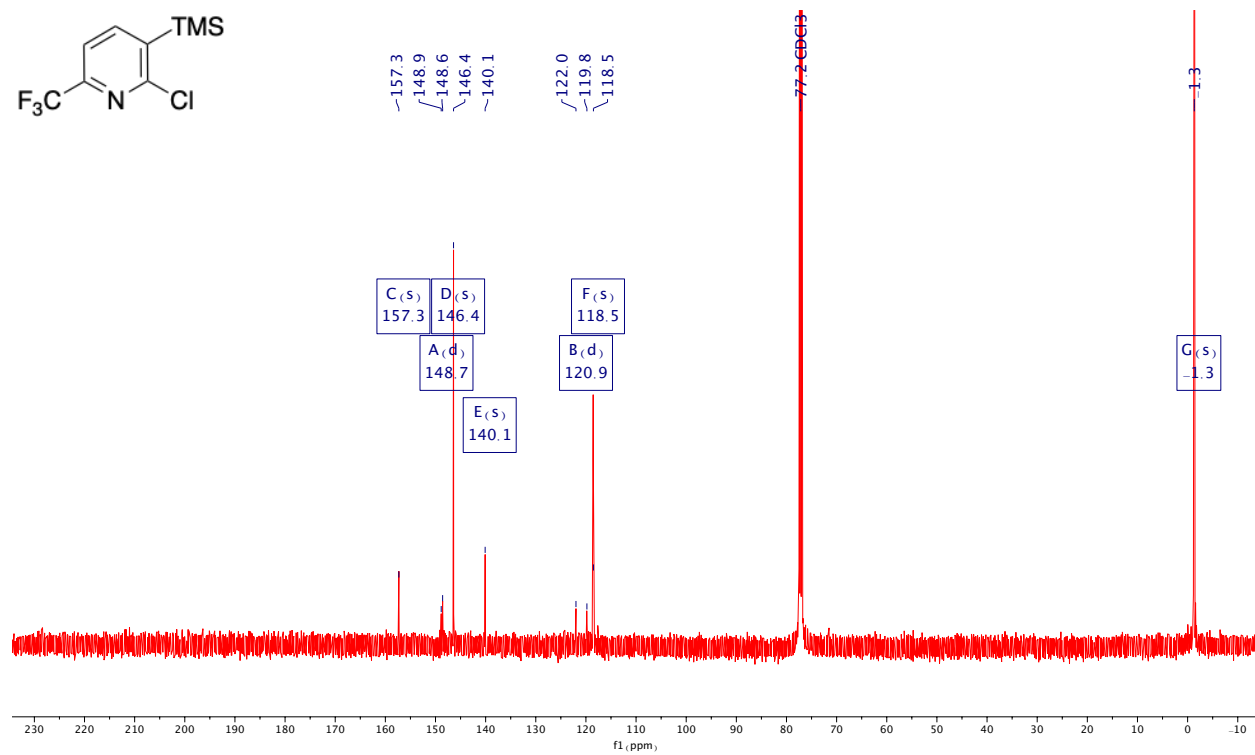

**$^{19}\text{F}$  NMR (470 MHz,  $\text{CDCl}_3$ ) of 2-Chloro-6-(trifluoromethyl)-3-(trimethylsilyl)pyridine (1y)**

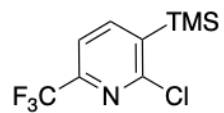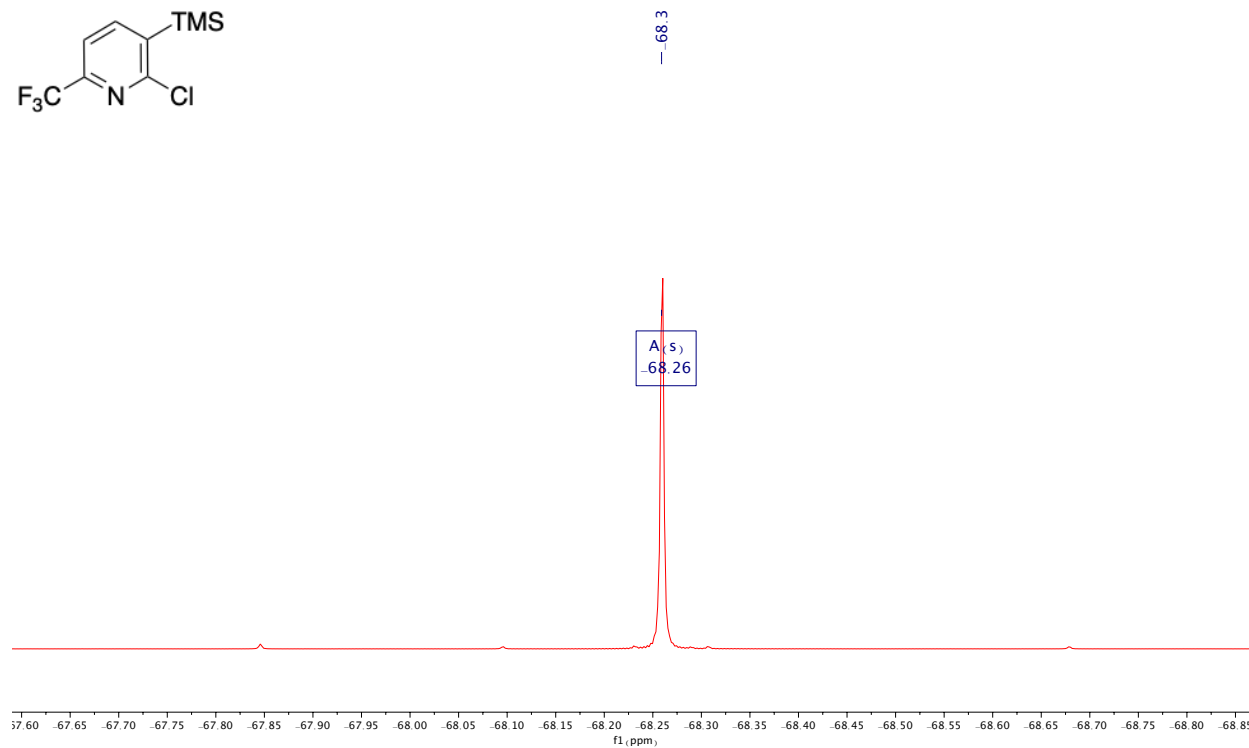

**$^{29}\text{Si}$  NMR (99MHz,  $\text{CDCl}_3$ ) of 2-Chloro-6-(trifluoromethyl)-3-(trimethylsilyl)pyridine (1y)**

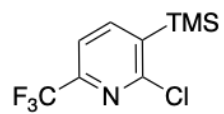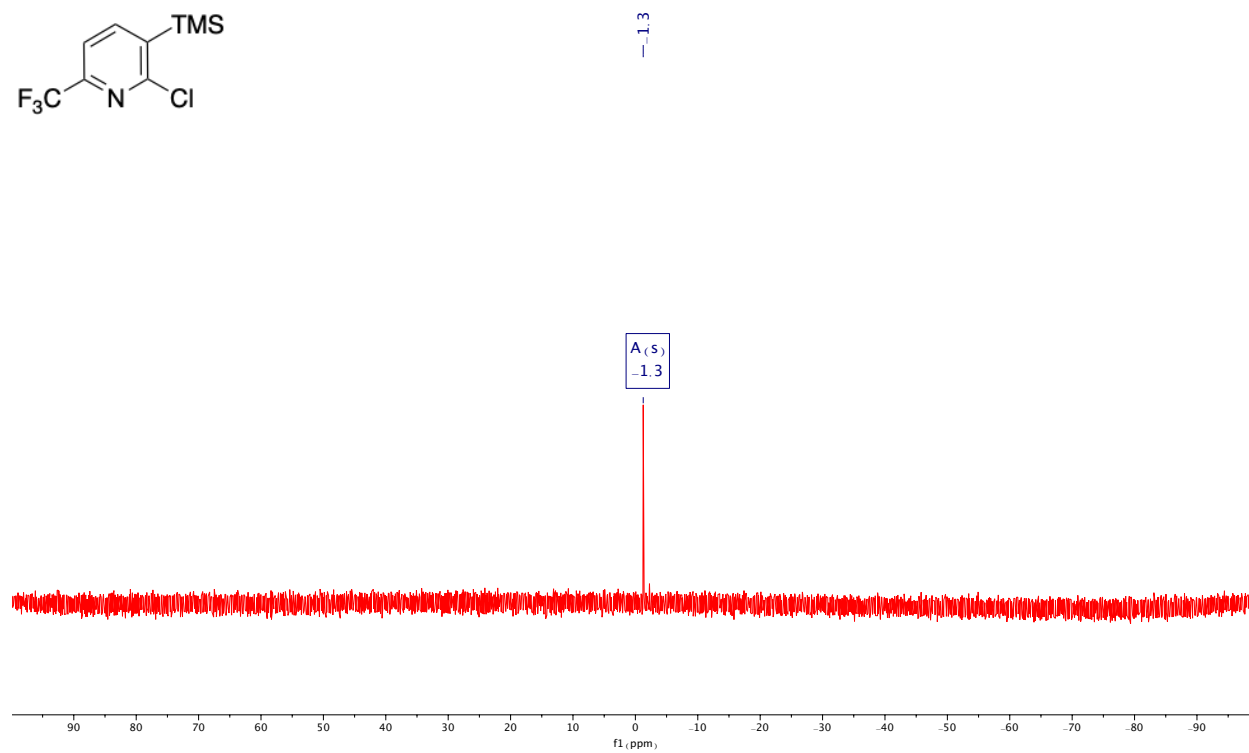

<sup>1</sup>H NMR (500MHz, CDCl<sub>3</sub>) 2-chloro-6-(trifluoromethyl)-4-(trimethylsilyl)pyridine (1x)

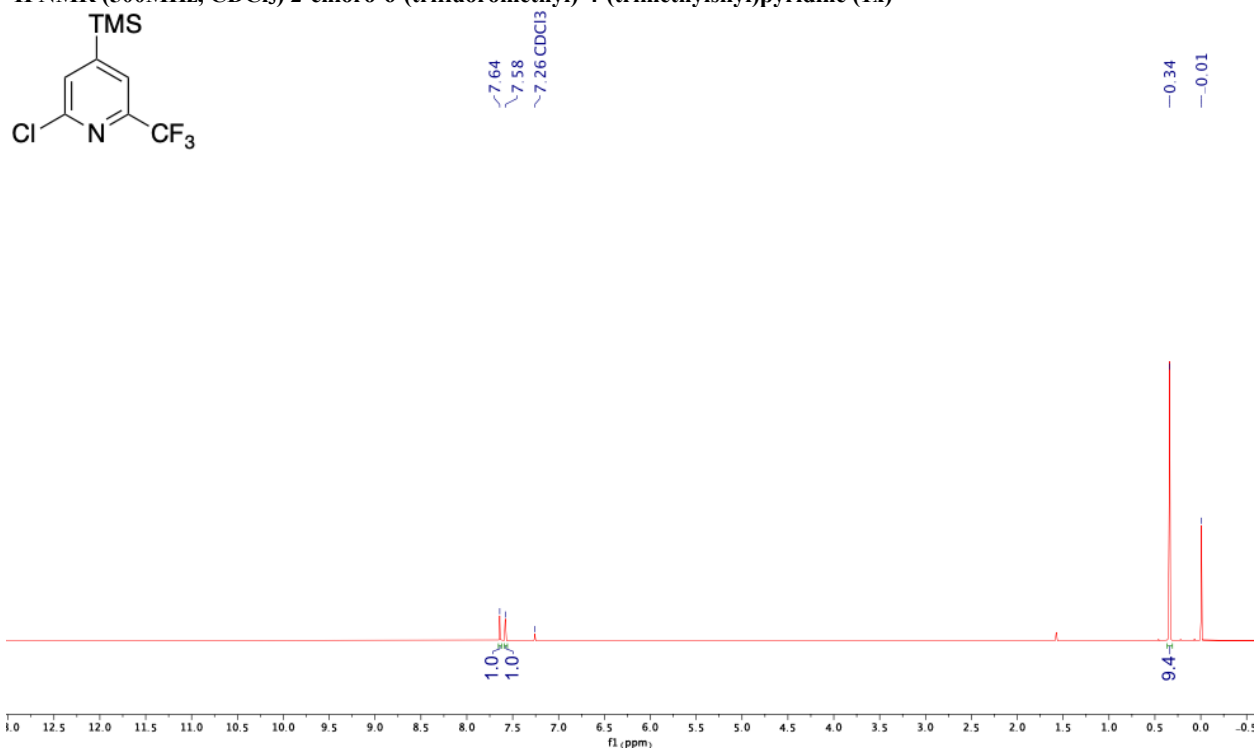

<sup>13</sup>C{<sup>1</sup>H} (126 MHz, CDCl<sub>3</sub>) NMR of 2-chloro-6-(trifluoromethyl)-4-(trimethylsilyl)pyridine (1x)

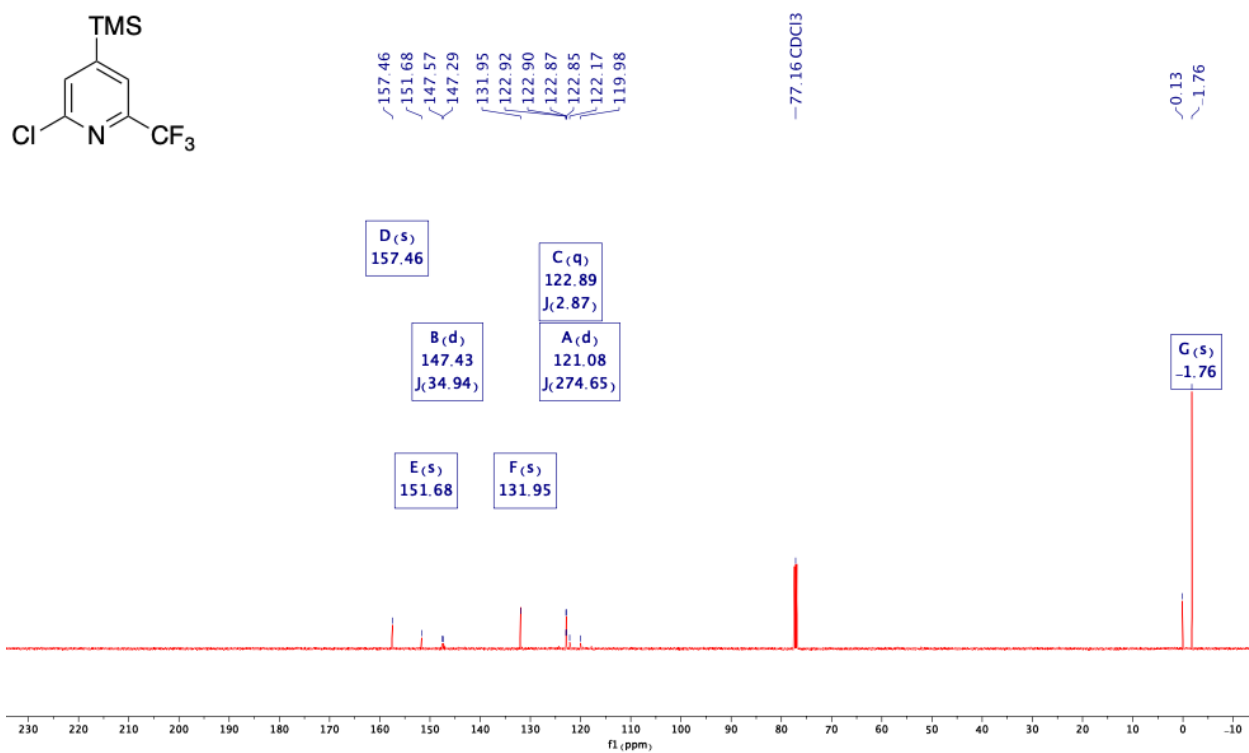

<sup>1</sup>H NMR (500MHz, CDCl<sub>3</sub>) *t*-butyl-4-(4,4,5,5-tetramethyl-1,3,2-dioxaborolan-2-yl)-2-(trimethylsilyl)pyrrole-1-carboxylate (1ab)

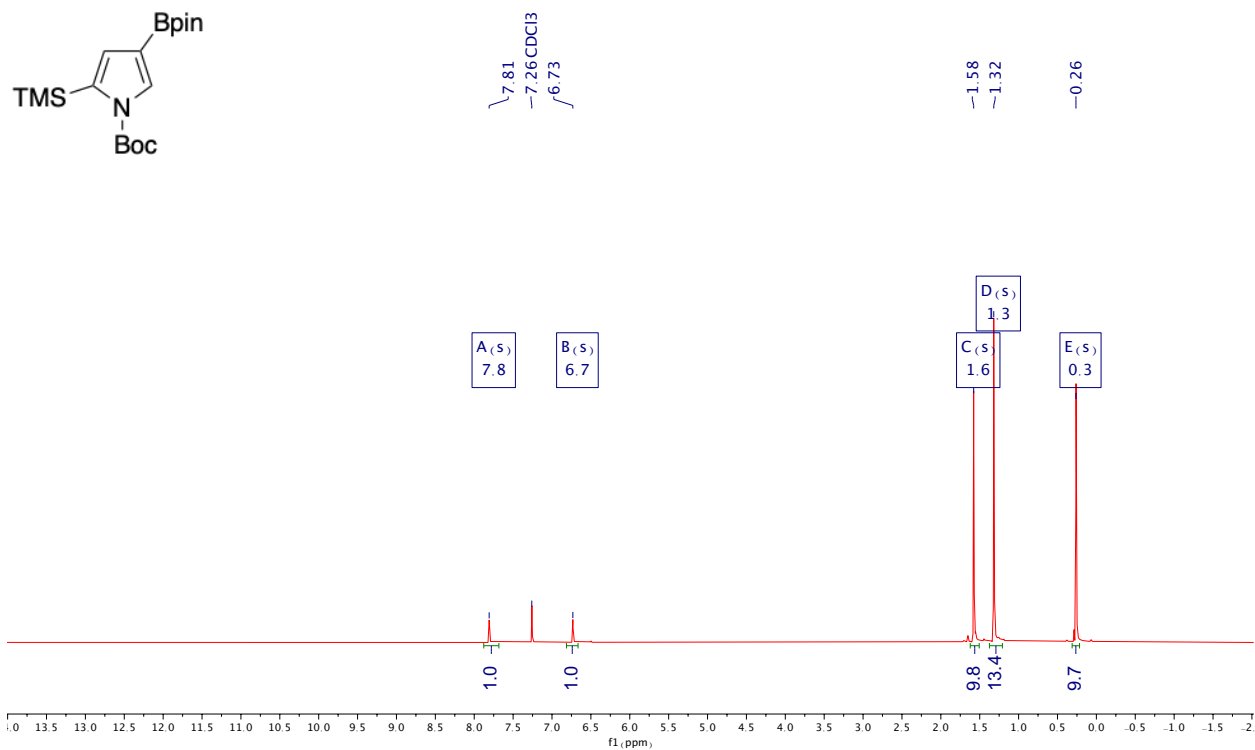

<sup>13</sup>C{<sup>1</sup>H} (126 MHz, CDCl<sub>3</sub>) of *t*-butyl-4-(4,4,5,5-tetramethyl-1,3,2-dioxaborolan-2-yl)-2-(trimethylsilyl)pyrrole-1-carboxylate (1ab)

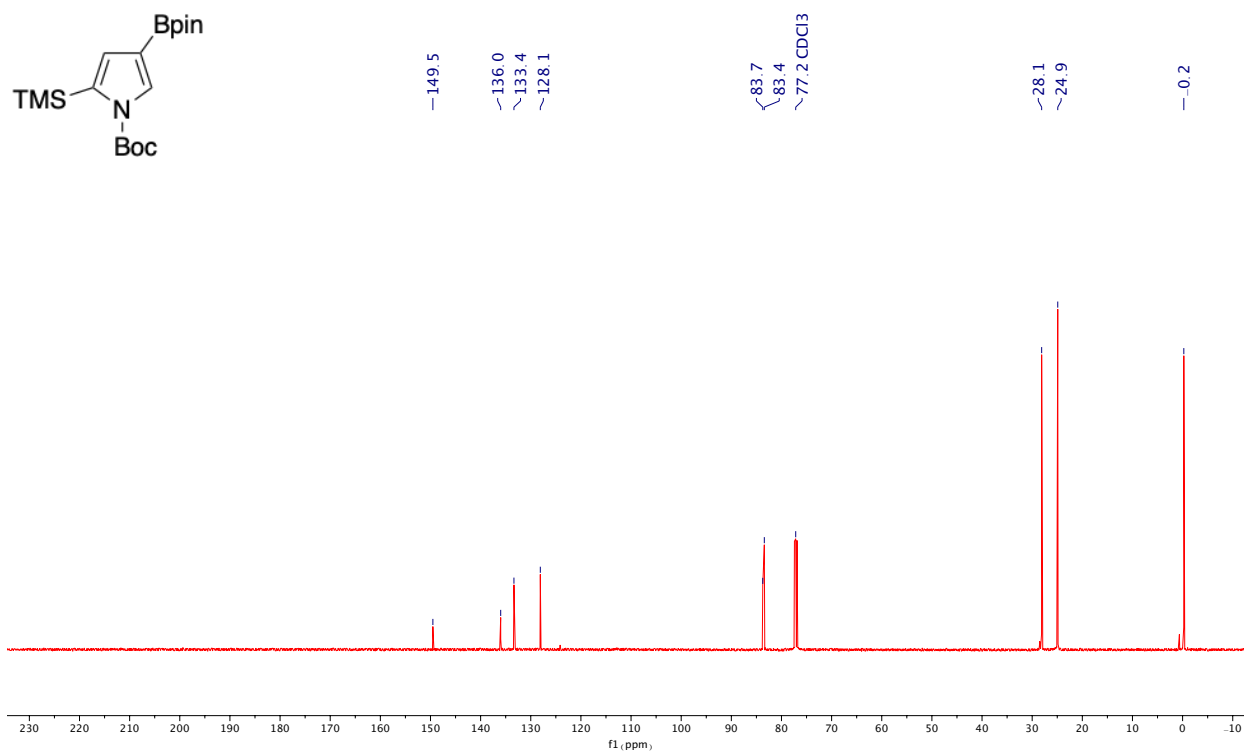

<sup>29</sup>Si NMR (99 MHz, CDCl<sub>3</sub>) of *t*-butyl-4-(4,4,5,5-tetramethyl-1,3,2-dioxaborolan-2-yl)-2-(trimethylsilyl)pyrrole-1-carboxylate (1ab)

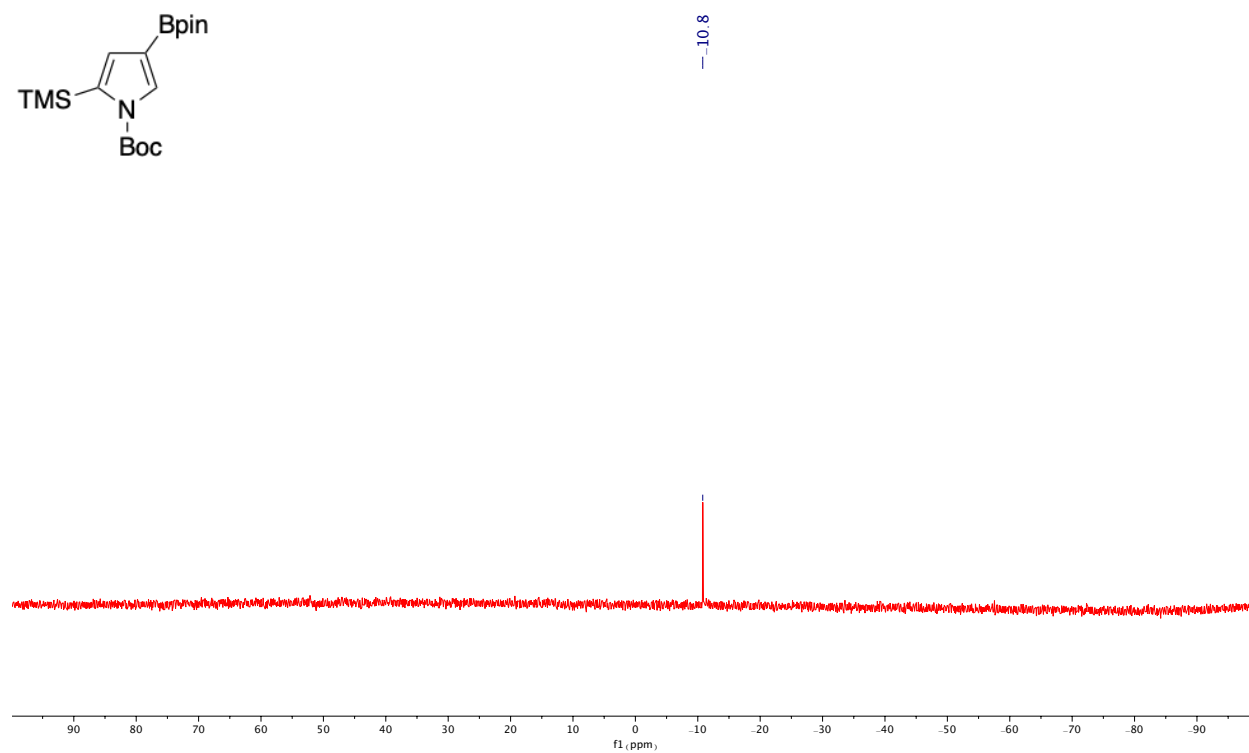

**$^{11}\text{B}$  NMR (160 MHz,  $\text{CDCl}_3$ ) of *t*-butyl-4-(4,4,5,5-tetramethyl-1,3,2-dioxaborolan-2-yl)-2-(trimethylsilyl)pyrrole-1-carboxylate (1ab)**

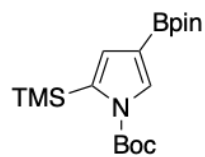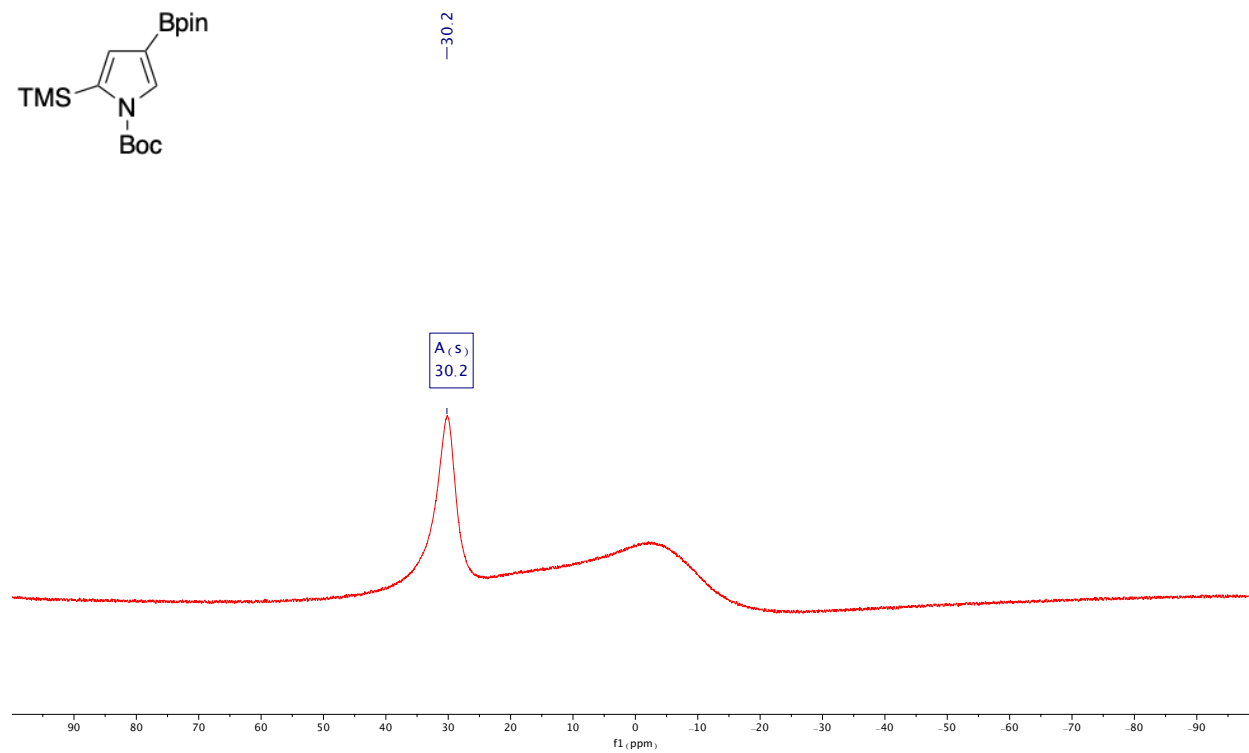

**$^1\text{H}$  NMR (500 MHz,  $\text{CDCl}_3$ ) of 2-bromo-4-(4,4,5,5-tetramethyl-1,3,2-dioxaborolan-2-yl)-6-(trimethylsilyl)pyridine (1ac)**

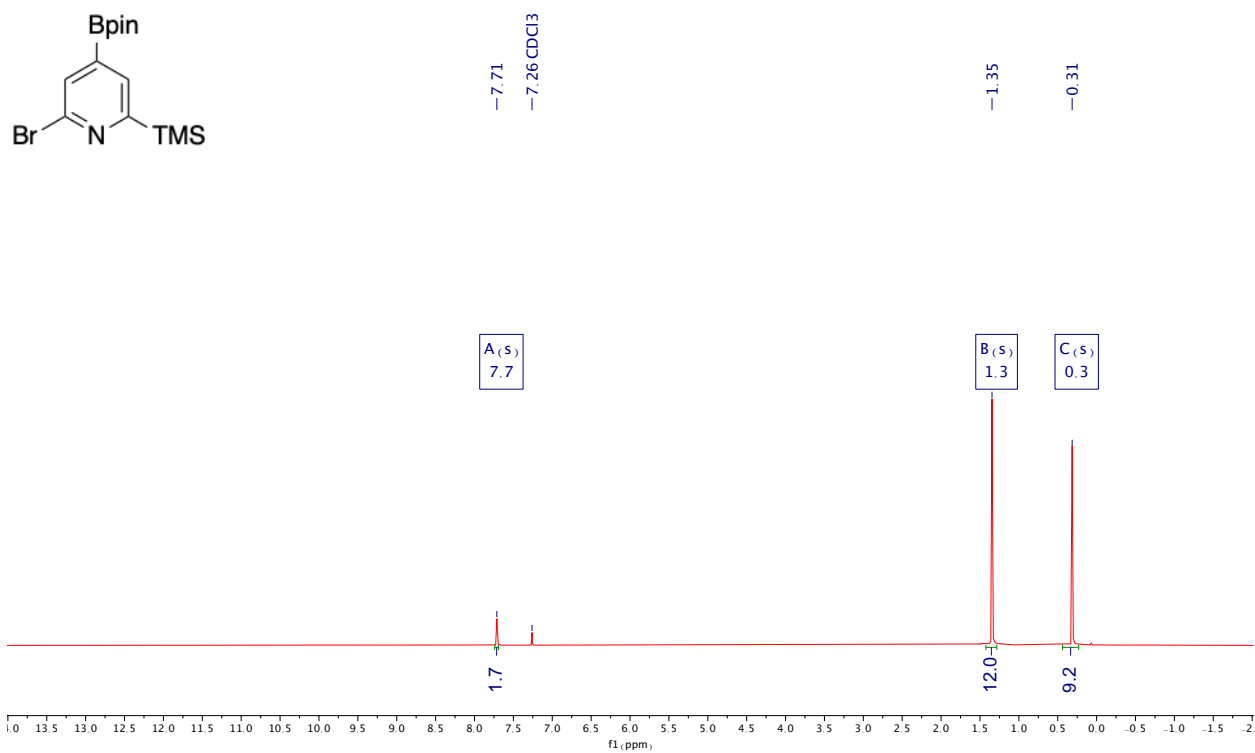

$^{13}\text{C}\{^1\text{H}\}$  (126 MHz,  $\text{CDCl}_3$ ) NMR of 2-bromo-4-(4,4,5,5-tetramethyl-1,3,2-dioxaborolan-2-yl)-6-(trimethylsilyl)pyridine (1ac)

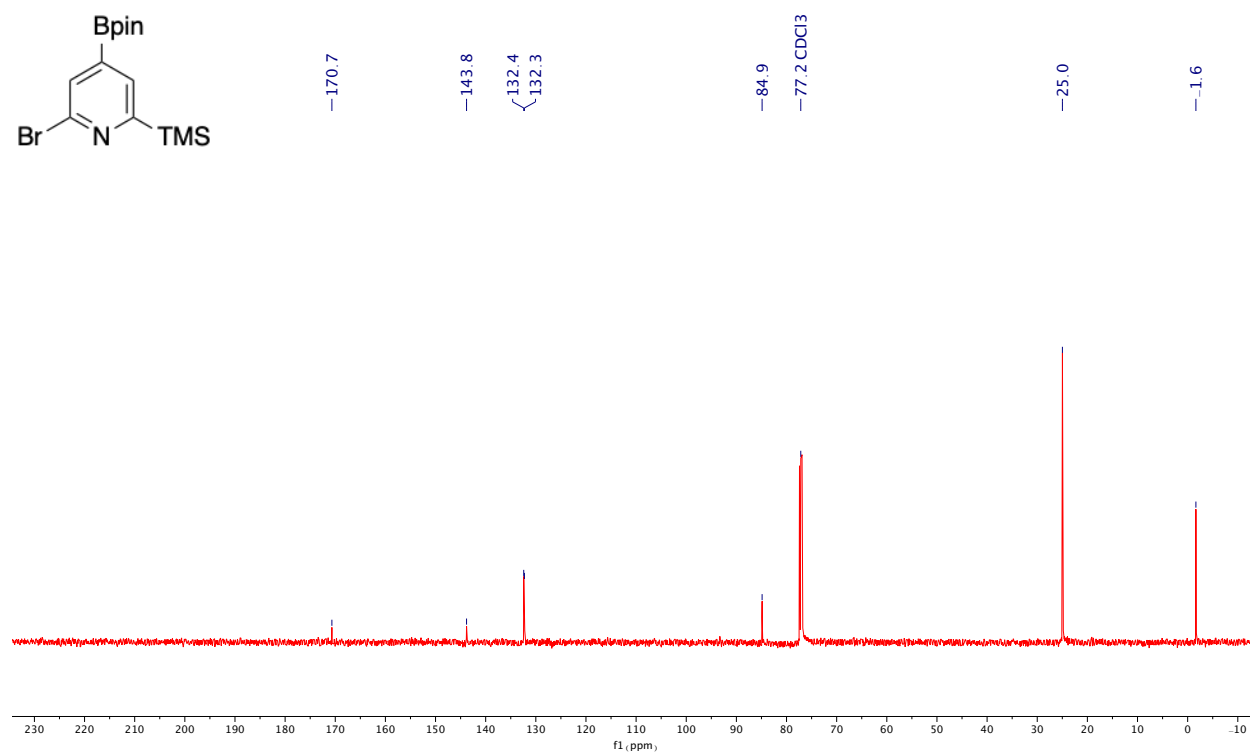

<sup>11</sup>B NMR (160 MHz, CDCl<sub>3</sub>) of 2-bromo-4-(4,4,5,5-tetramethyl-1,3,2-dioxaborolan-2-yl)-6-(trimethylsilyl)pyridine (1ac)

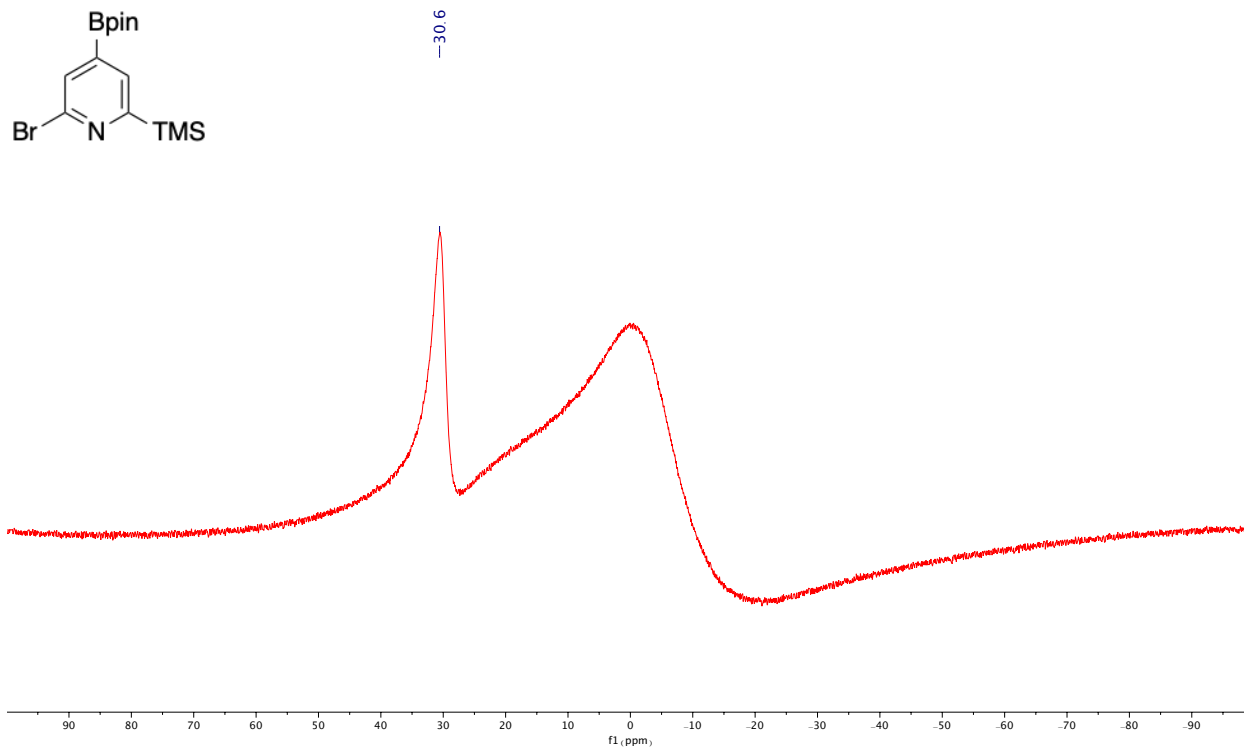

<sup>29</sup>Si NMR (99 MHz, CDCl<sub>3</sub>) of 2-bromo-4-(4,4,5,5-tetramethyl-1,3,2-dioxaborolan-2-yl)-6-(trimethylsilyl)pyridine (1ac)

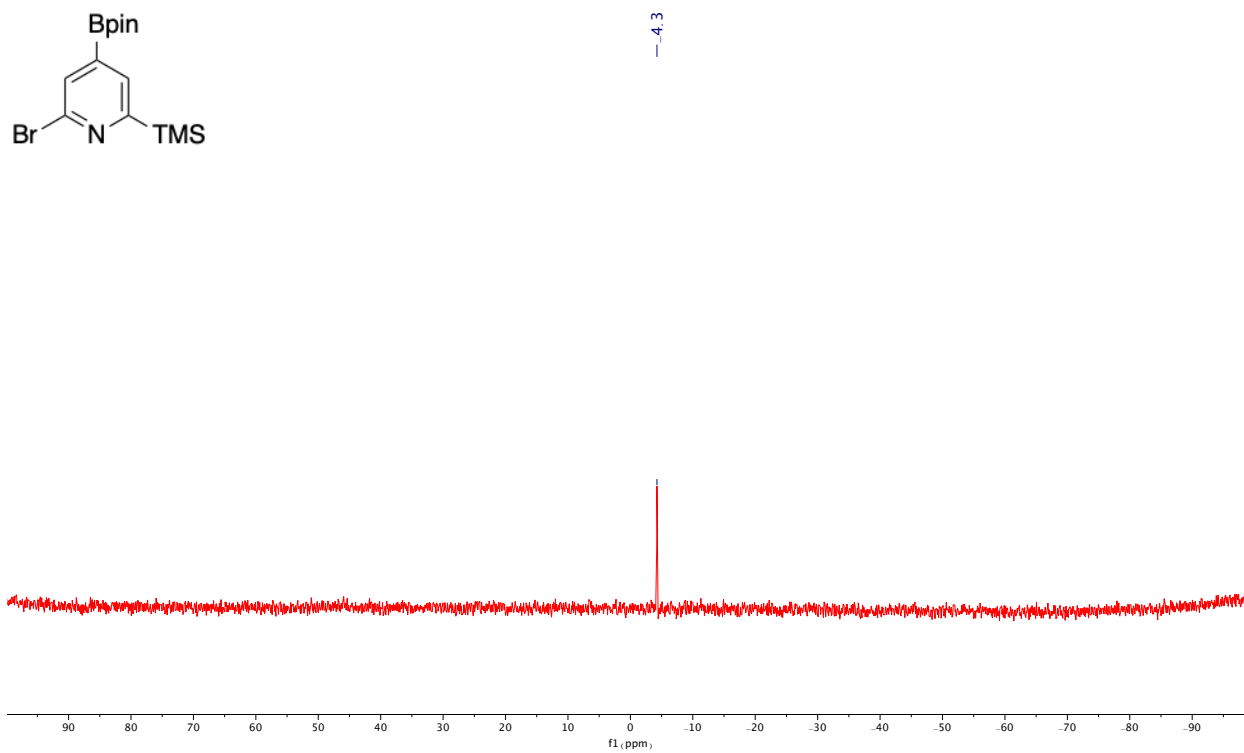

**<sup>1</sup>H NMR (500 MHz, CDCl<sub>3</sub>) of trimethyl(2-(4,4,5,5-tetramethyl-1,3,2-dioxaborolan-2-yl)phenyl)silane (1ad)**

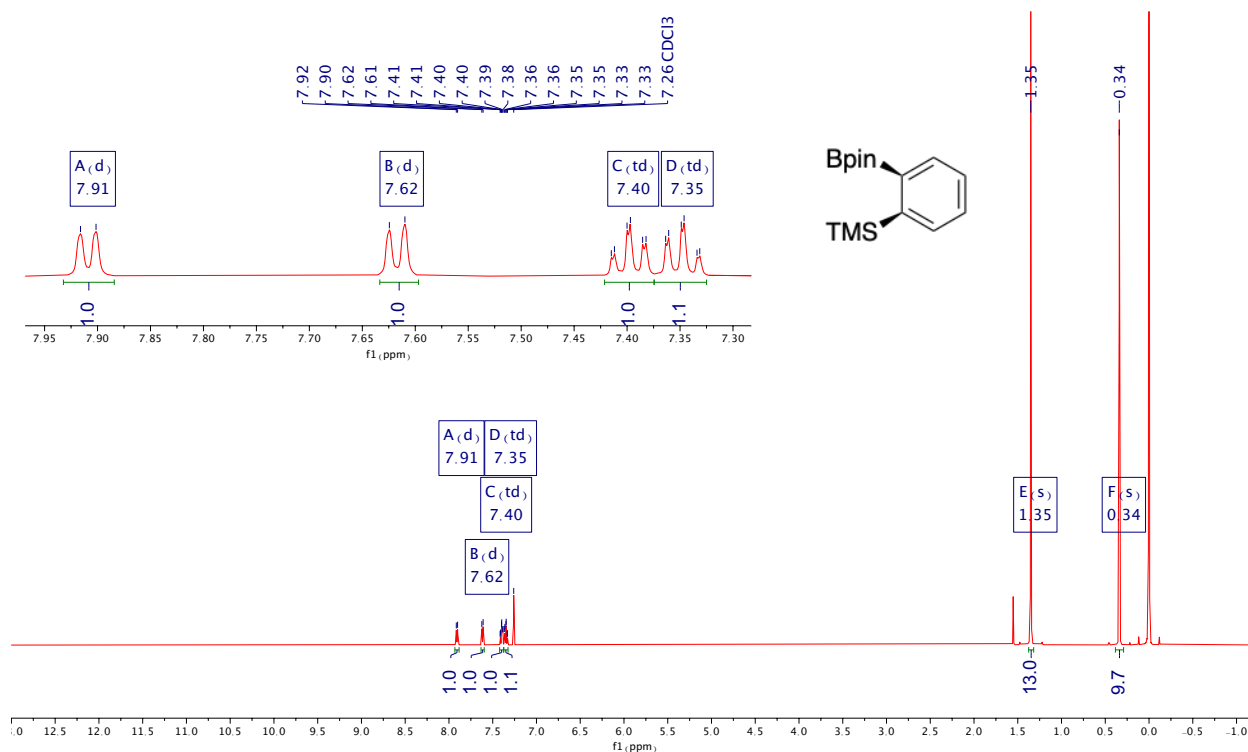

**<sup>1</sup>H NMR (500 MHz, CDCl<sub>3</sub>) of trimethyl(2-(4,4,5,5-tetramethyl-1,3,2-dioxaborolan-2-yl)phenyl)silane (1v)**

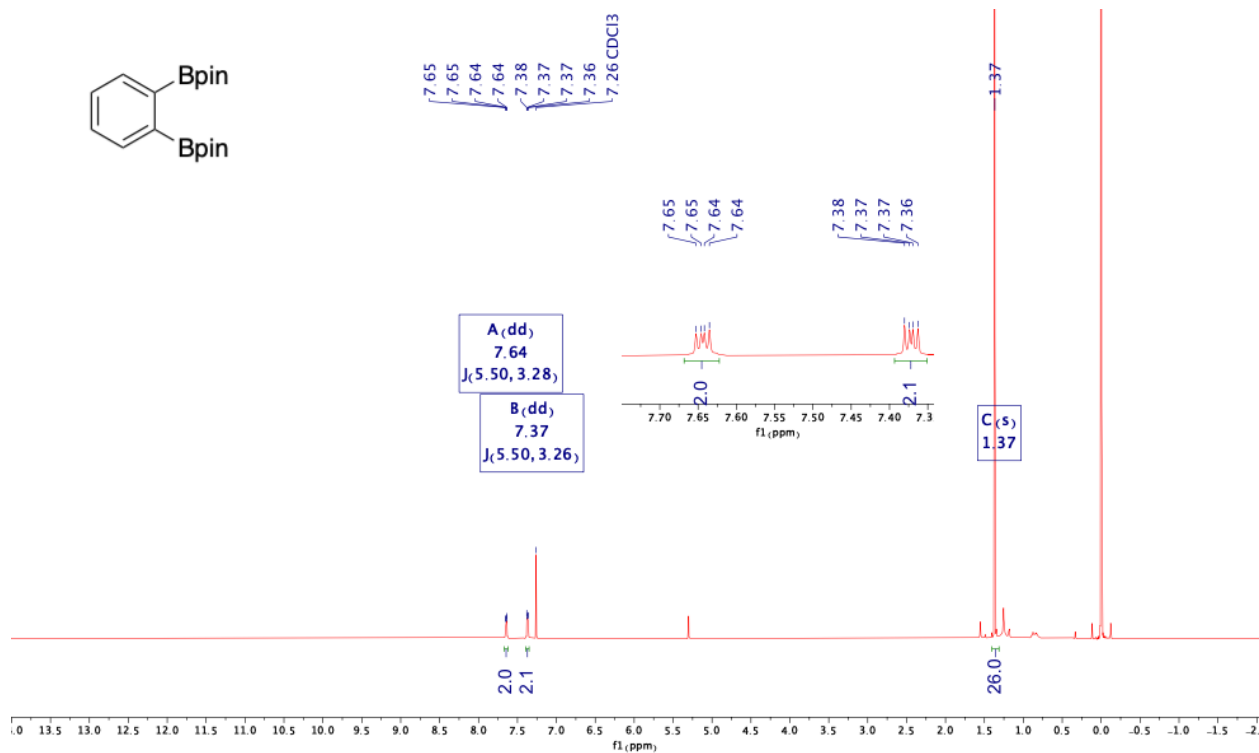

Chemical structure of N-benzyloxycarbonyl-L-phenylalanine (Bpin): C1CCC(CC1)C(=O)OCC2=CC=CC=C2

<sup>1</sup>H NMR spectrum (DMSO-d<sub>6</sub>) showing peaks for Bpin and impurities. The x-axis represents chemical shift (f1, ppm) from 14.0 to -1.5. The y-axis represents intensity.

Peak assignments and integration values:

- A (m), 3.32, 0.89
- B (t), 3.13, 0.40
- C (td), 2.91, 0.89
- D (dd), 2.71, 0.85
- E (ddd), 1.93, 0.90
- F (m), 1.82, 1.78
- G (m), 1.75, 0.50
- H (m), 1.64, 2.02
- I (m), 1.50, 0.92
- J (s), 1.19, 11.99

Chemical structure of the compound is shown above the spectrum:

[NH2+]1CCCCC1C(Br)C(C)(C)C(C)C

The spectrum displays several peaks corresponding to the chemical structure:

- Peak at 75.6 ppm (labeled  $-75.6$ ) corresponds to the  $\text{NH}_2^+$  group.
- Peak at 44.5 ppm (labeled  $-44.5$ ) corresponds to the  $\text{Br}^-$  ion.
- Peak at 24.3 ppm (labeled  $24.3$ ) corresponds to the  $\text{C}(\text{CH}_3)_2$  group.
- Peak at 23.6 ppm (labeled  $23.6$ ) corresponds to the  $\text{C}(\text{CH}_3)_2$  group.
- Peak at 22.5 ppm (labeled  $22.5$ ) corresponds to the  $\text{C}(\text{CH}_3)_2$  group.
- Peak at 22.0 ppm (labeled  $22.0$ ) corresponds to the  $\text{C}(\text{CH}_3)_2$  group.

**$^{11}\text{B}$  NMR (160 MHz,  $\text{D}_2\text{O}$ ) of 2-(4,4,5,5-tetramethyl-1,3,2-dioxaborolan-2-yl)piperidin-1-ium bromide (2c)**

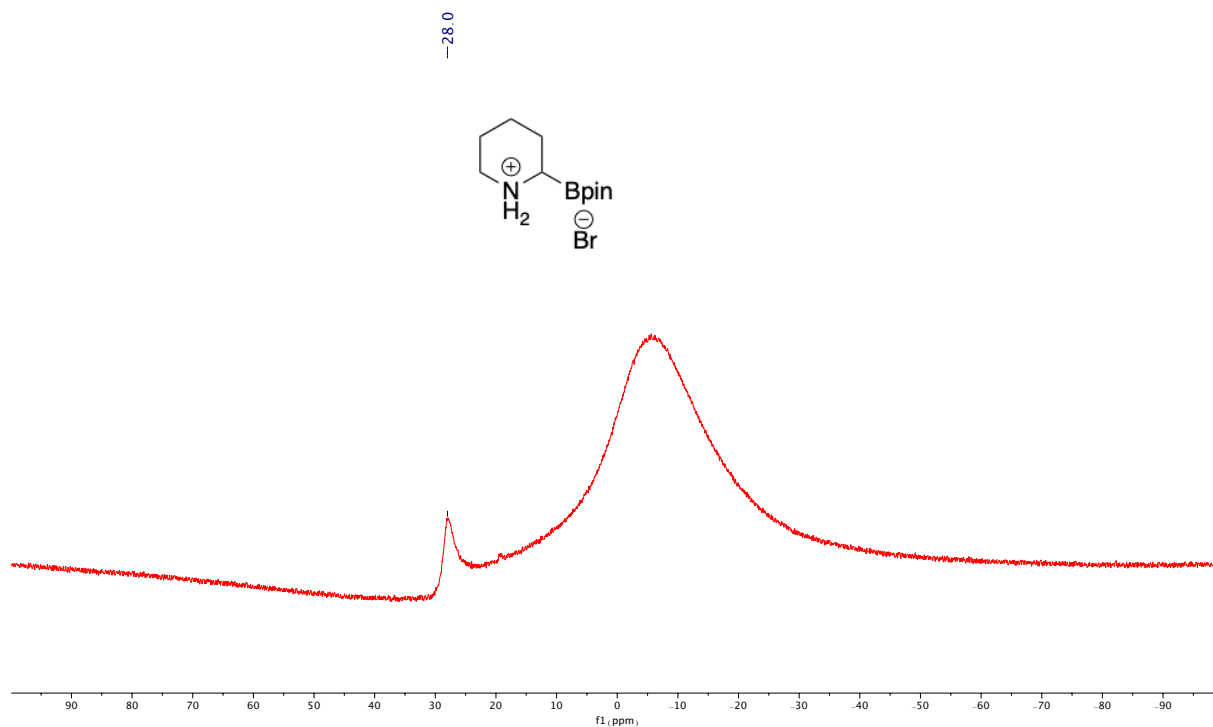

**$^1\text{H}$  NMR (500 MHz,  $\text{D}_2\text{O}$ ) of 3-(4,4,5,5-Tetramethyl-1,3,2-dioxaborolan-2-yl)piperidin-1-ium bromide (2b)**

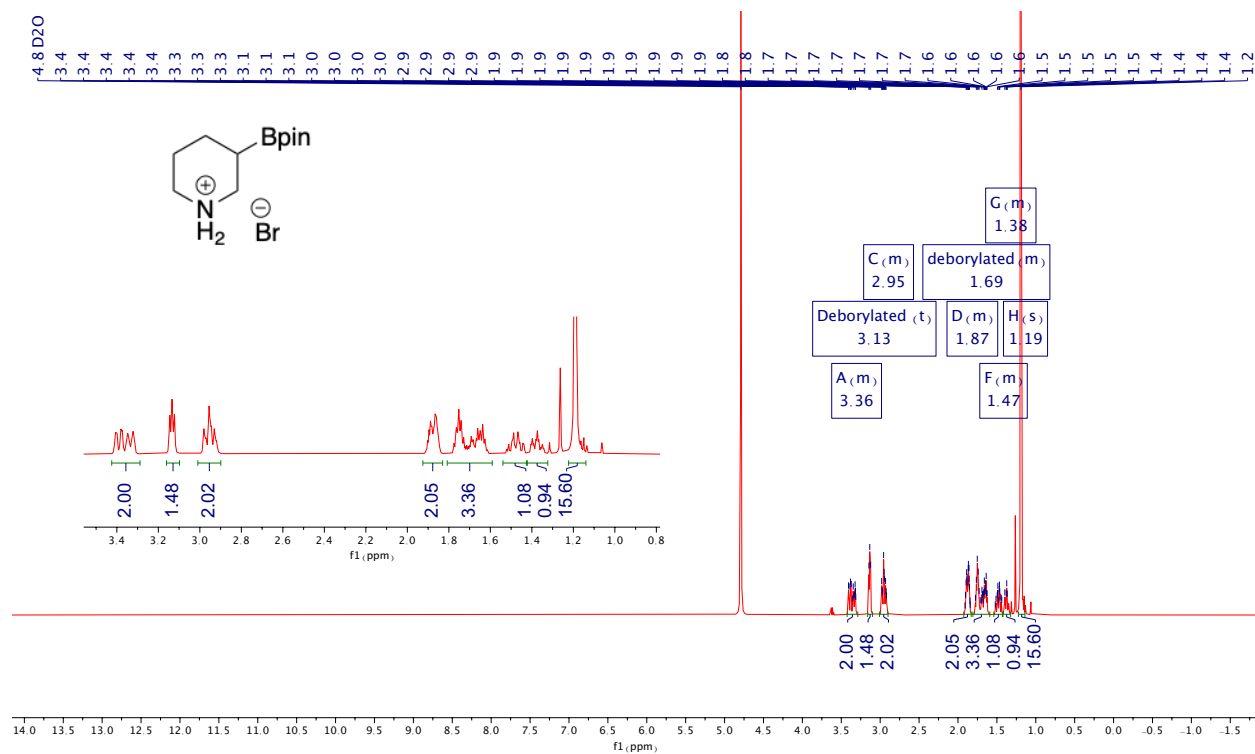

$^{13}\text{C}\{^1\text{H}\}$  (126 MHz,  $\text{D}_2\text{O}$ ) NMR of 3-(4,4,5,5-Tetramethyl-1,3,2-dioxaborolan-2-yl)piperidin-1-ium bromide (2b)

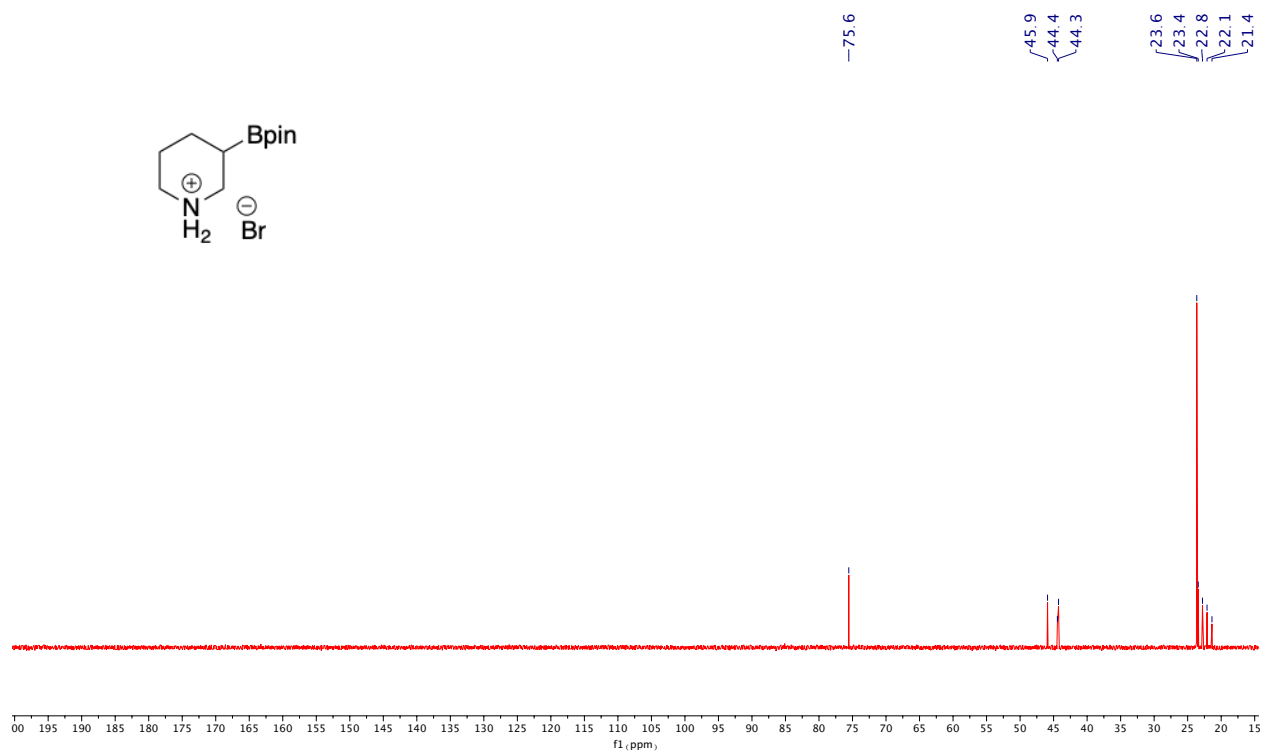

$^{11}\text{B}$  NMR (160 MHz,  $\text{D}_2\text{O}$ ) of 3-(4,4,5,5-Tetramethyl-1,3,2-dioxaborolan-2-yl)piperidin-1-ium bromide (2b)

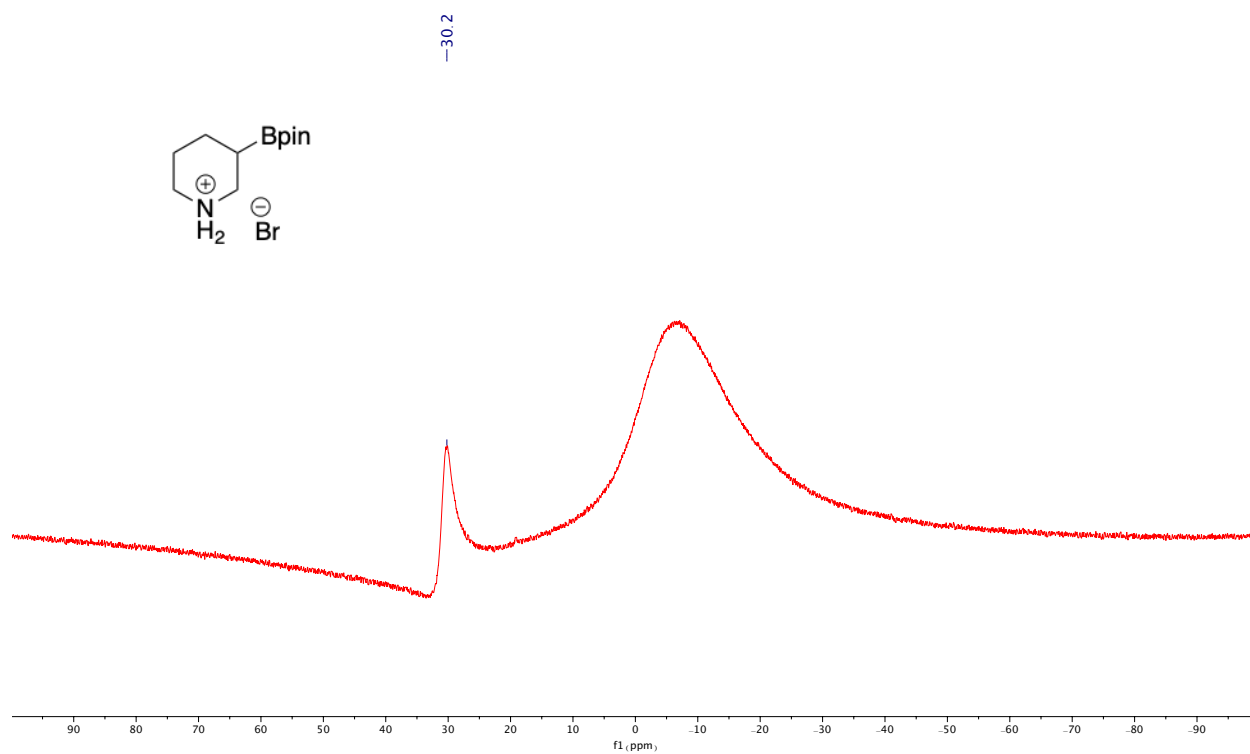

**$^1\text{H}$  NMR (500 MHz, DMSO) of 4-(4,4,5,5-tetramethyl-1,3,2-dioxaborolan-2-yl)piperidin-1-ium bromide (2d)**

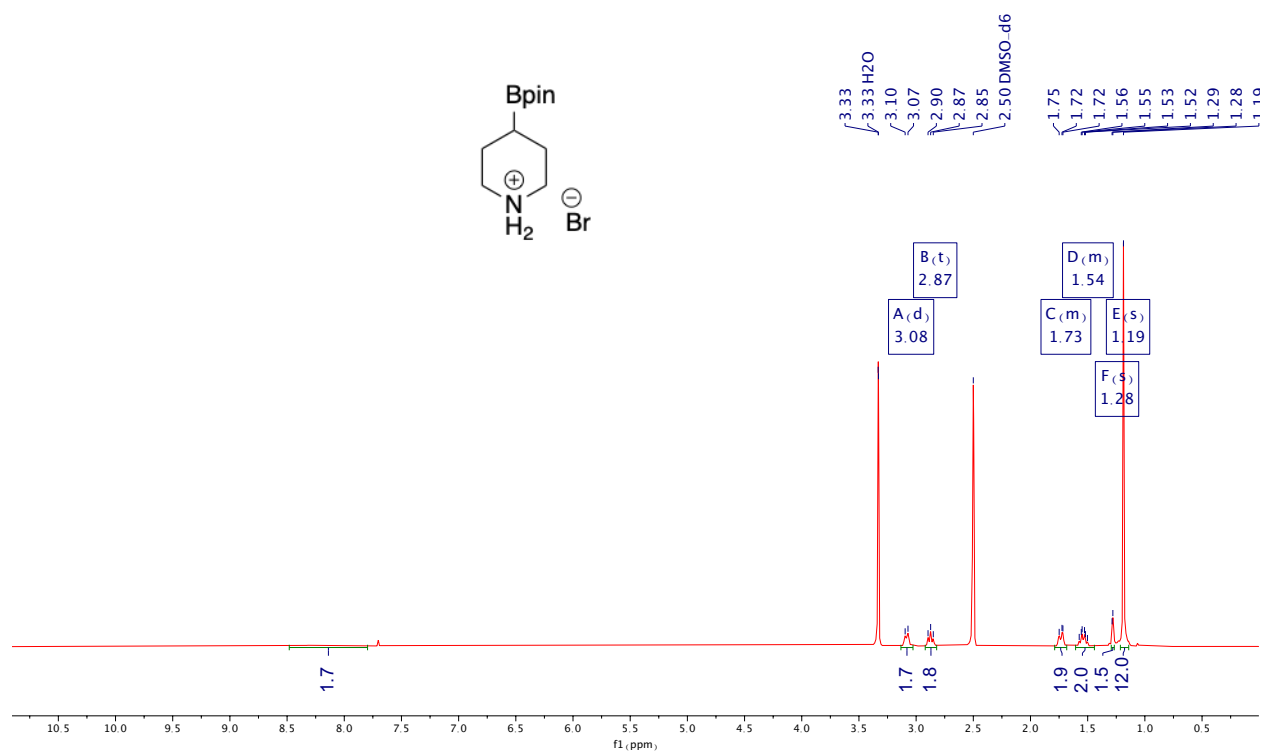

**$^{13}\text{C}\{^1\text{H}\}$  (126 MHz, DMSO) NMR of 4-(4,4,5,5-tetramethyl-1,3,2-dioxaborolan-2-yl)piperidin-1-ium bromide (2d)**

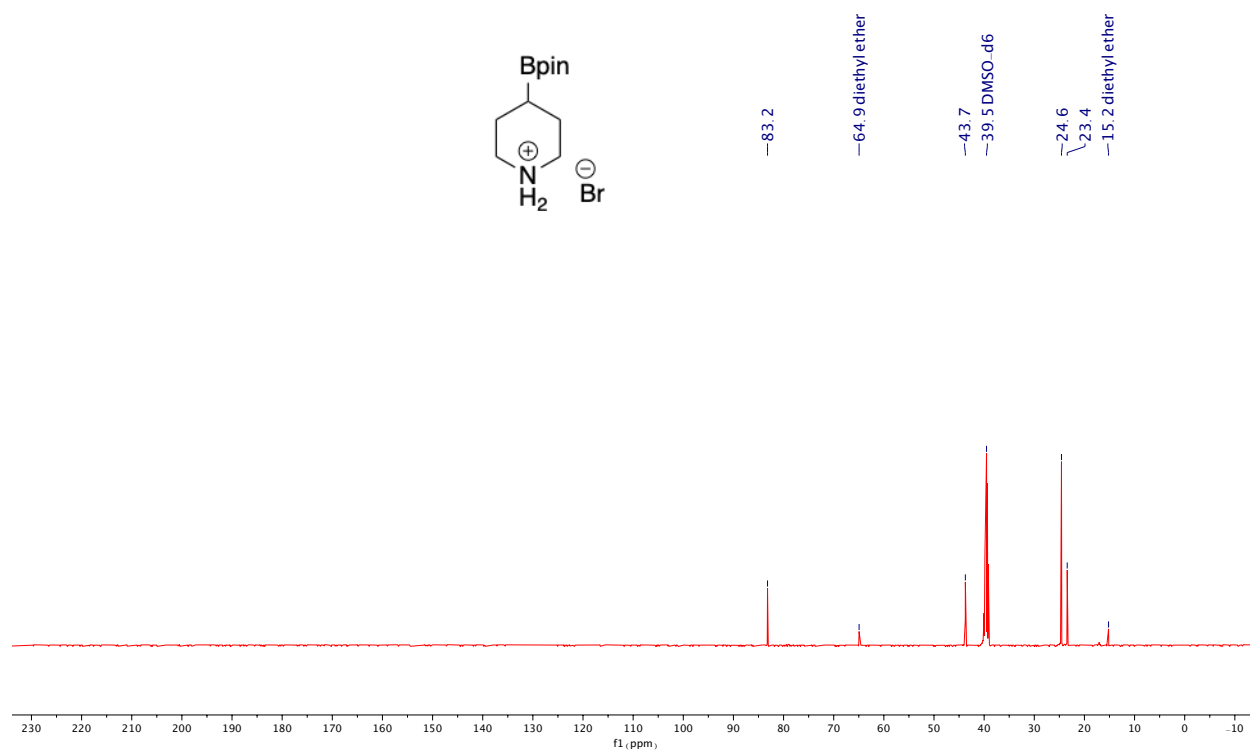

**$^{11}\text{B}$  NMR (160 MHz, DMSO) of 4-(4,4,5,5-tetramethyl-1,3,2-dioxaborolan-2-yl)piperidin-1-ium bromide (2d)**

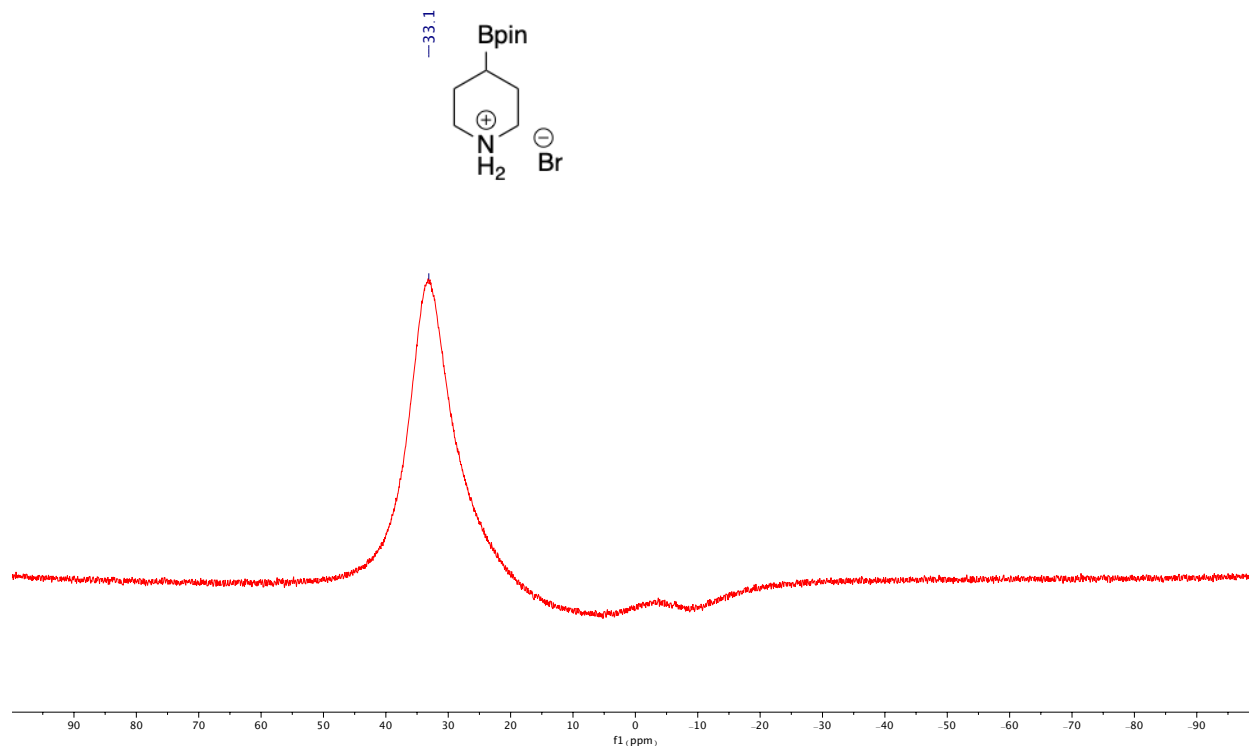

**$^1\text{H}$  NMR (500 MHz,  $\text{D}_2\text{O}$ ) of 2-methyl-4-(4,4,5,5-tetramethyl-1,3,2-dioxaborolan-2-yl)piperidin-1-ium bromide (2e)**

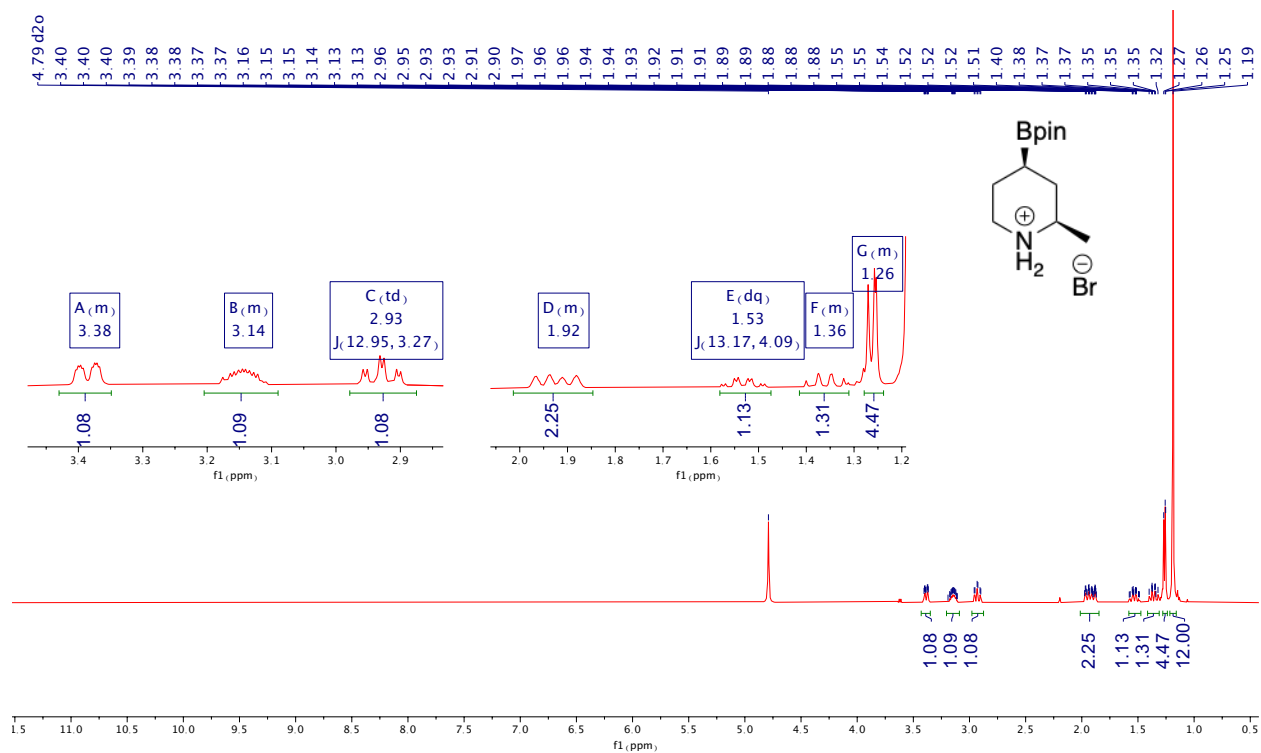

$^{13}\text{C}\{^1\text{H}\}$  (126 MHz,  $\text{D}_2\text{O}$ ) NMR of 2-methyl-4-(4,4,5,5-tetramethyl-1,3,2-dioxaborolan-2-yl)piperidin-1-ium bromide (2e)

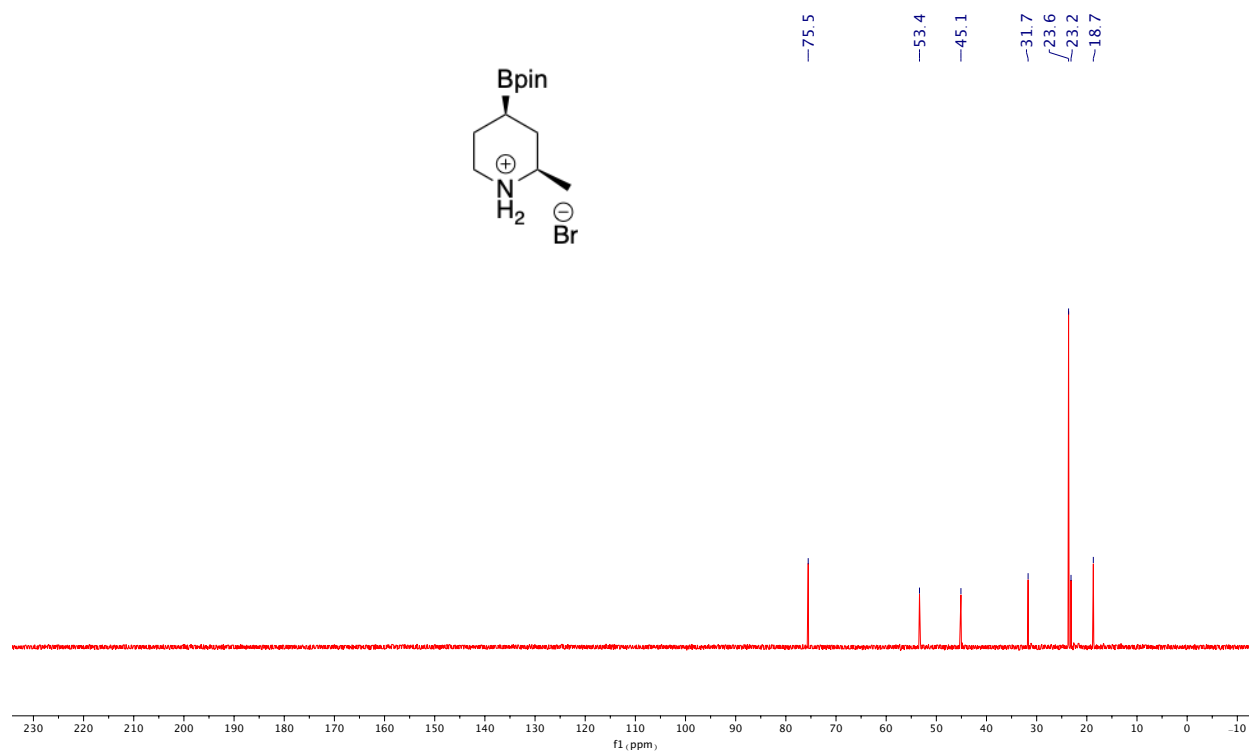

$^{11}\text{B}$  NMR (160 MHz,  $\text{D}_2\text{O}$ ) of 2-methyl-4-(4,4,5,5-tetramethyl-1,3,2-dioxaborolan-2-yl)piperidin-1-ium bromide (2e)

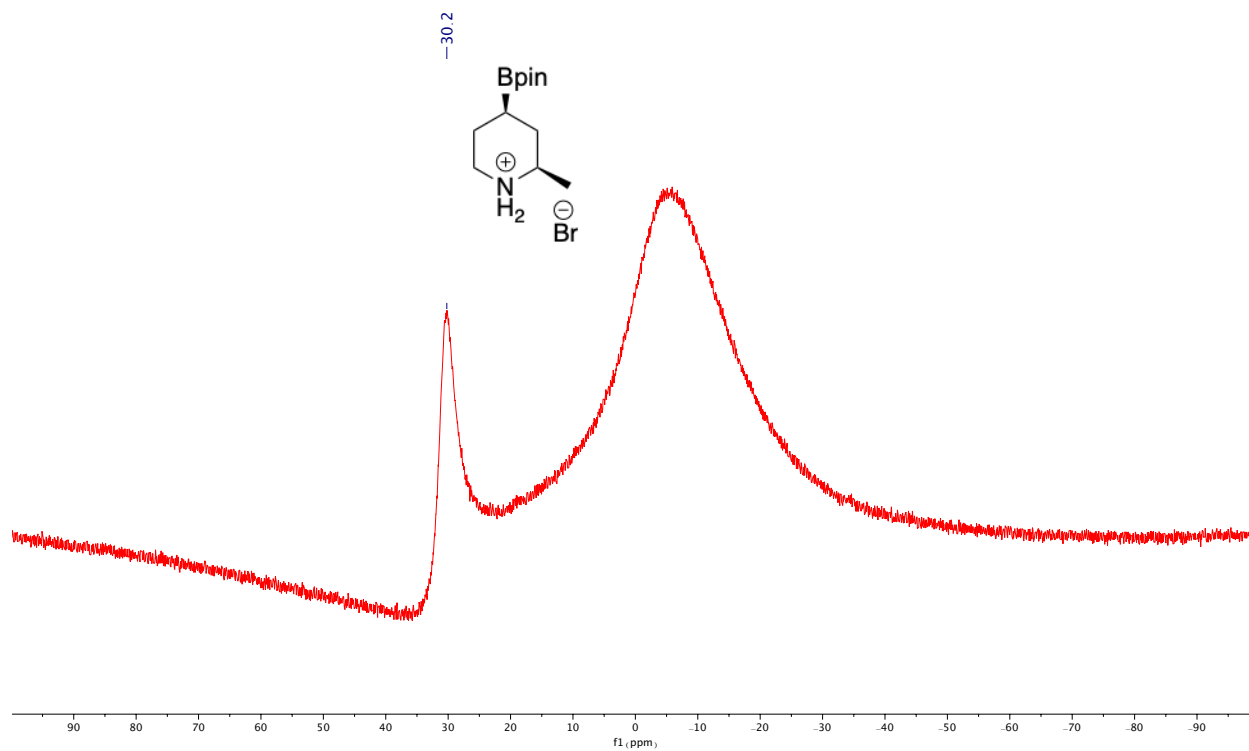

$^1\text{H}$  NMR (500 MHz,  $\text{CDCl}_3$ ) of 2,6-dimethyl-4-(4,4,5,5-tetramethyl-1,3,2-dioxaborolan-2-yl)piperidine (2f)

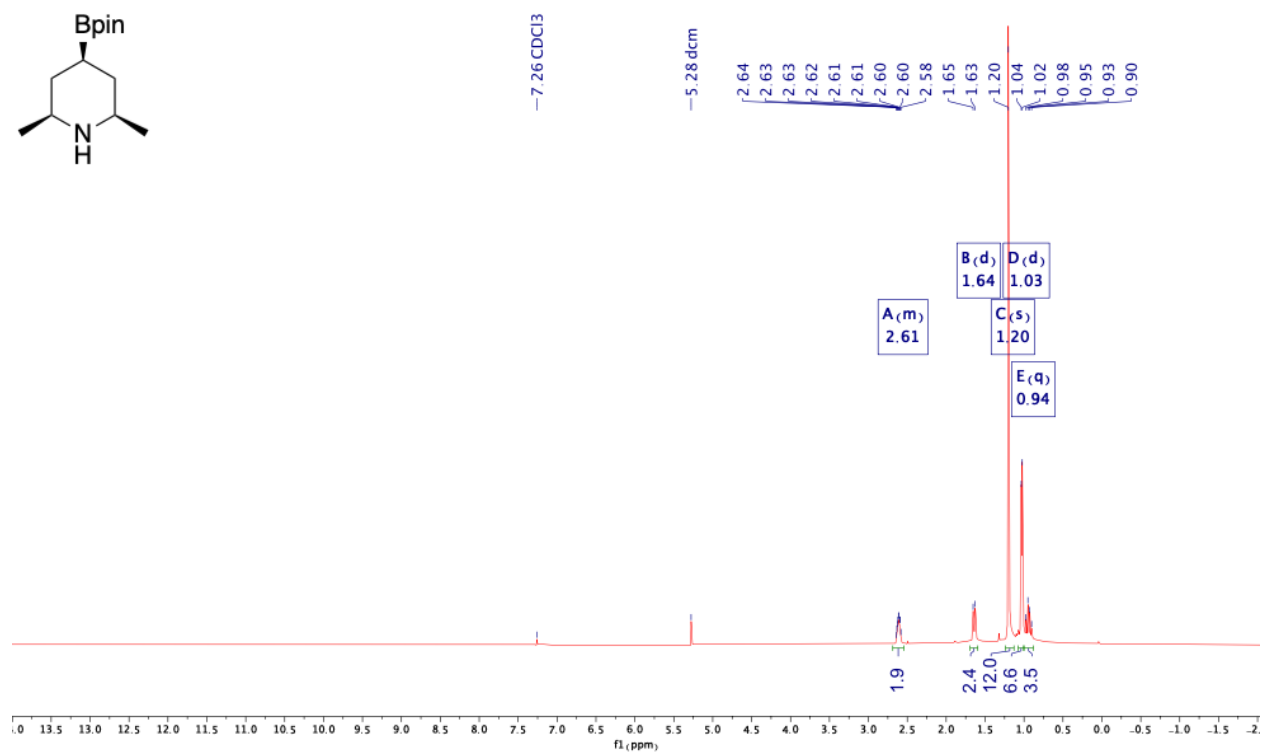

$^{13}\text{C}\{^1\text{H}\}$  (126 MHz,  $\text{CDCl}_3$ ) NMR of 2,6-dimethyl-4-(4,4,5,5-tetramethyl-1,3,2-dioxaborolan-2-yl)piperidine (2f)

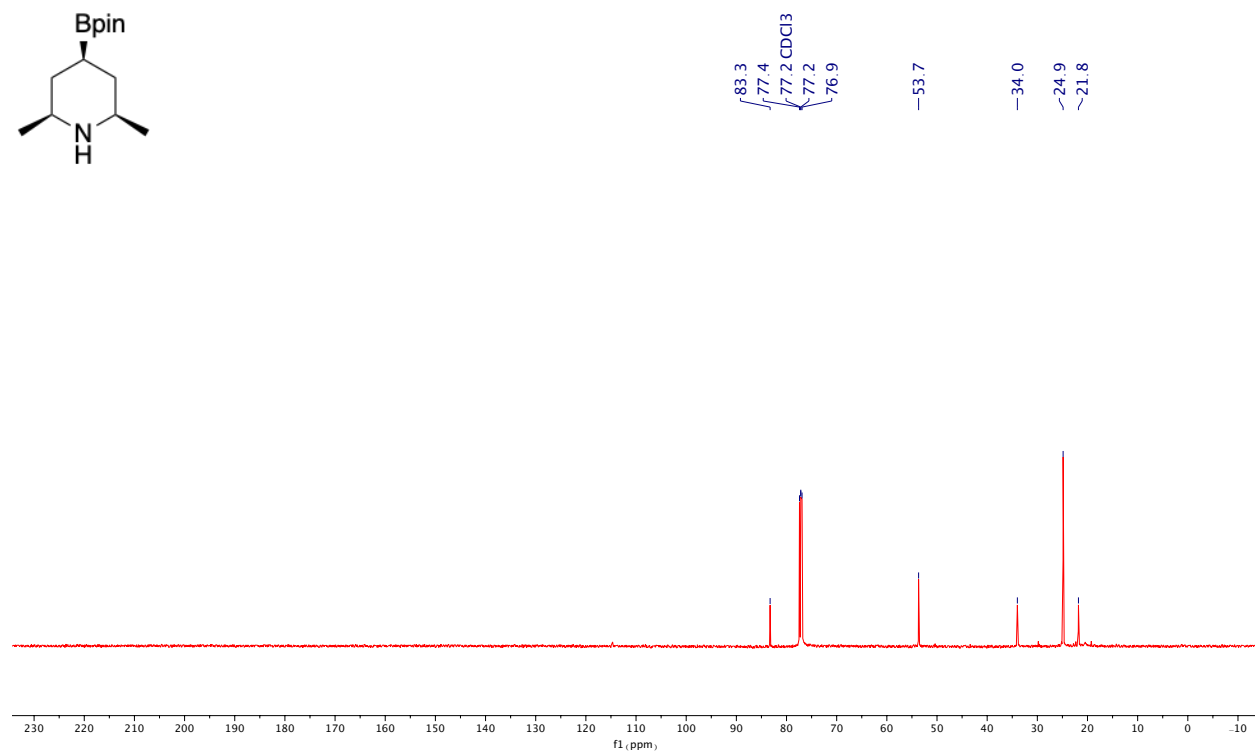

$^{11}\text{B}$  NMR (160 MHz,  $\text{CDCl}_3$ ) of 2,6-dimethyl-4-(4,4,5,5-tetramethyl-1,3,2-dioxaborolan-2-yl)piperidine (2f)

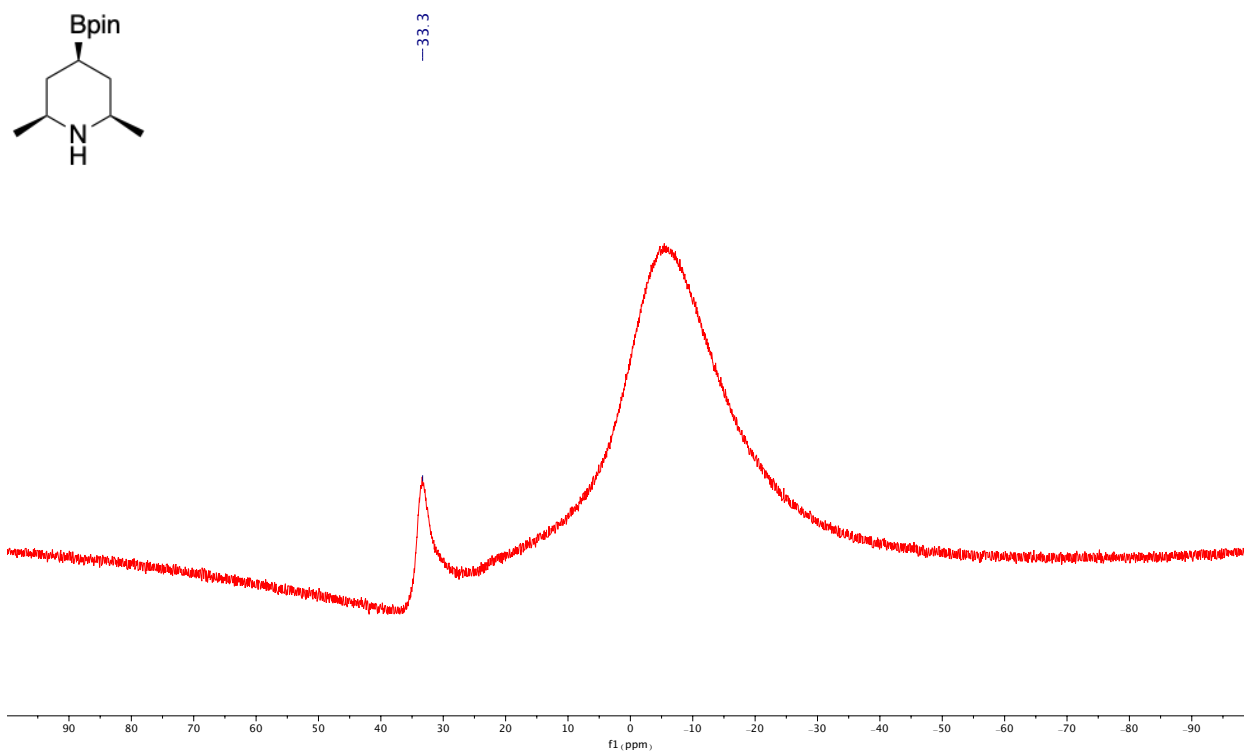

$^1\text{H}$  NMR (500 MHz,  $\text{C}_6\text{D}_6$ ) of *tert*-butyl 3-(4,4,5,5-tetramethyl-1,3,2-dioxaborolan-2-yl)pyrrolidine-1-carboxylate (2g)

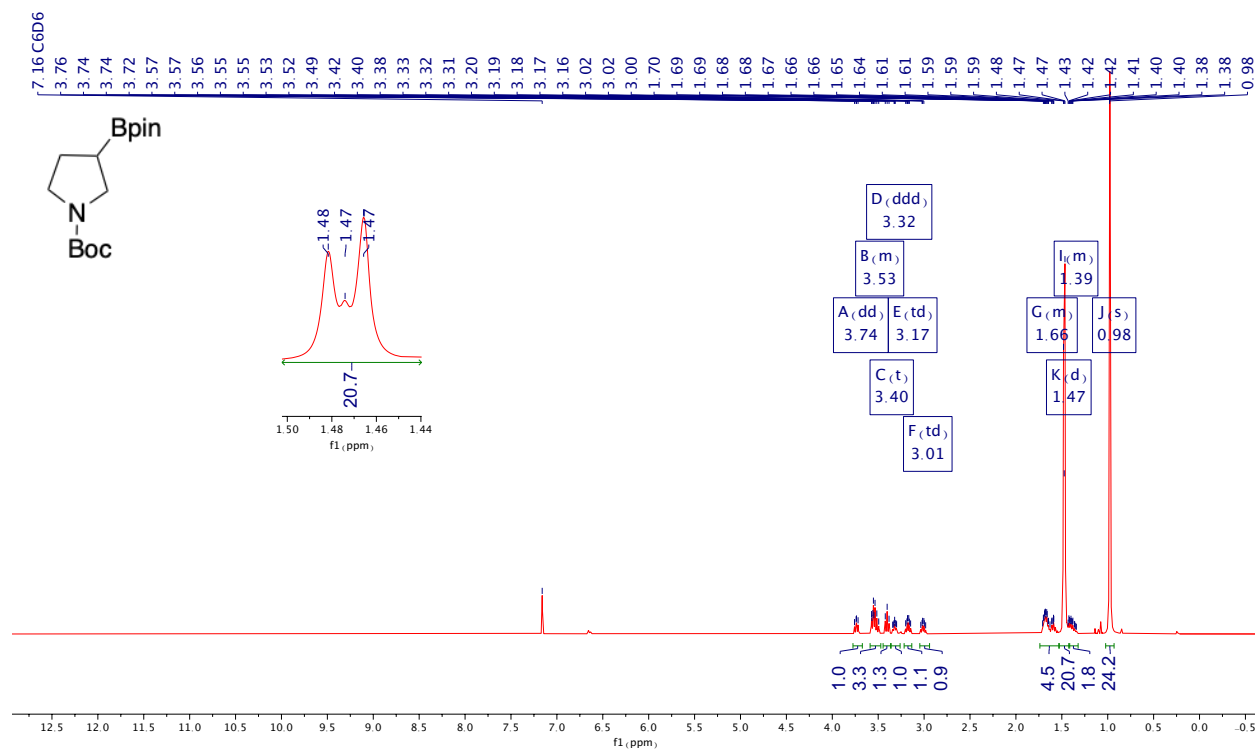

$^{13}\text{C}\{^1\text{H}\}$  (126 MHz,  $\text{C}_6\text{D}_6$ ) NMR of *tert*-butyl 3-(4,4,5,5-tetramethyl-1,3,2-dioxaborolan-2-yl)pyrrolidine-1-carboxylate (2g)

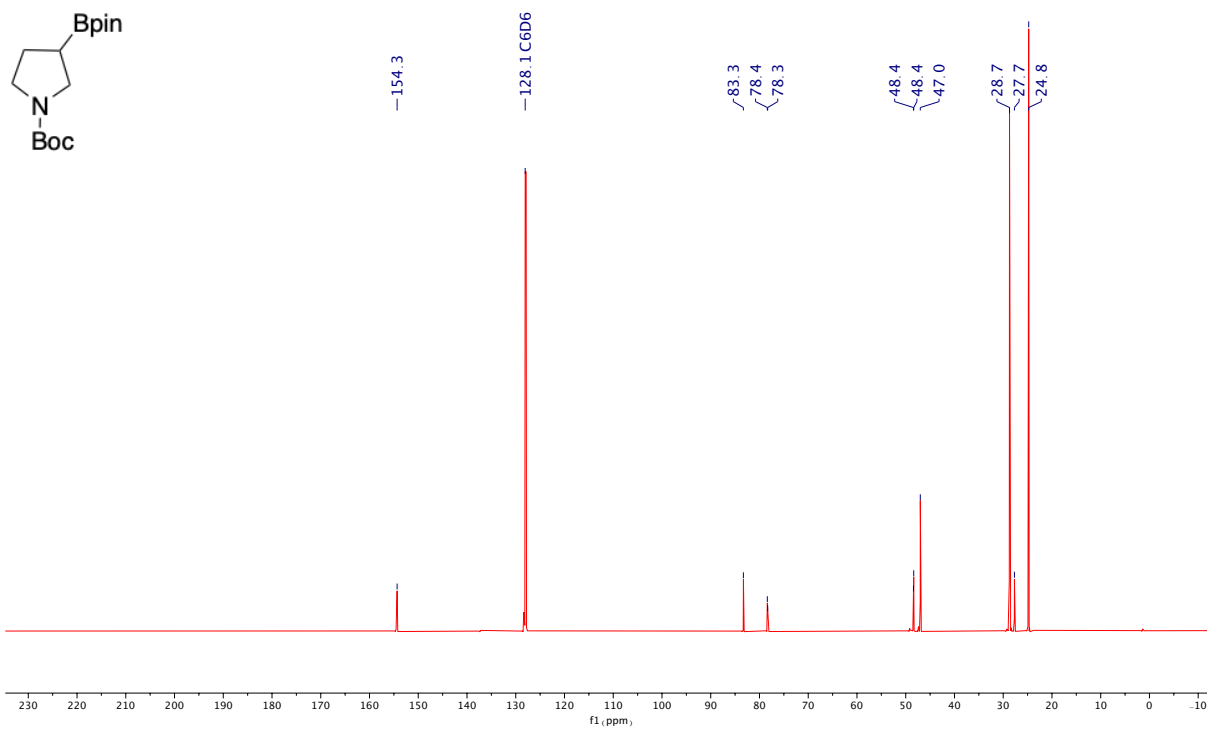

$^{11}\text{B}$  NMR (160 MHz,  $\text{C}_6\text{D}_6$ ) of *tert*-butyl 3-(4,4,5,5-tetramethyl-1,3,2-dioxaborolan-2-yl)pyrrolidine-1-carboxylate (2g)

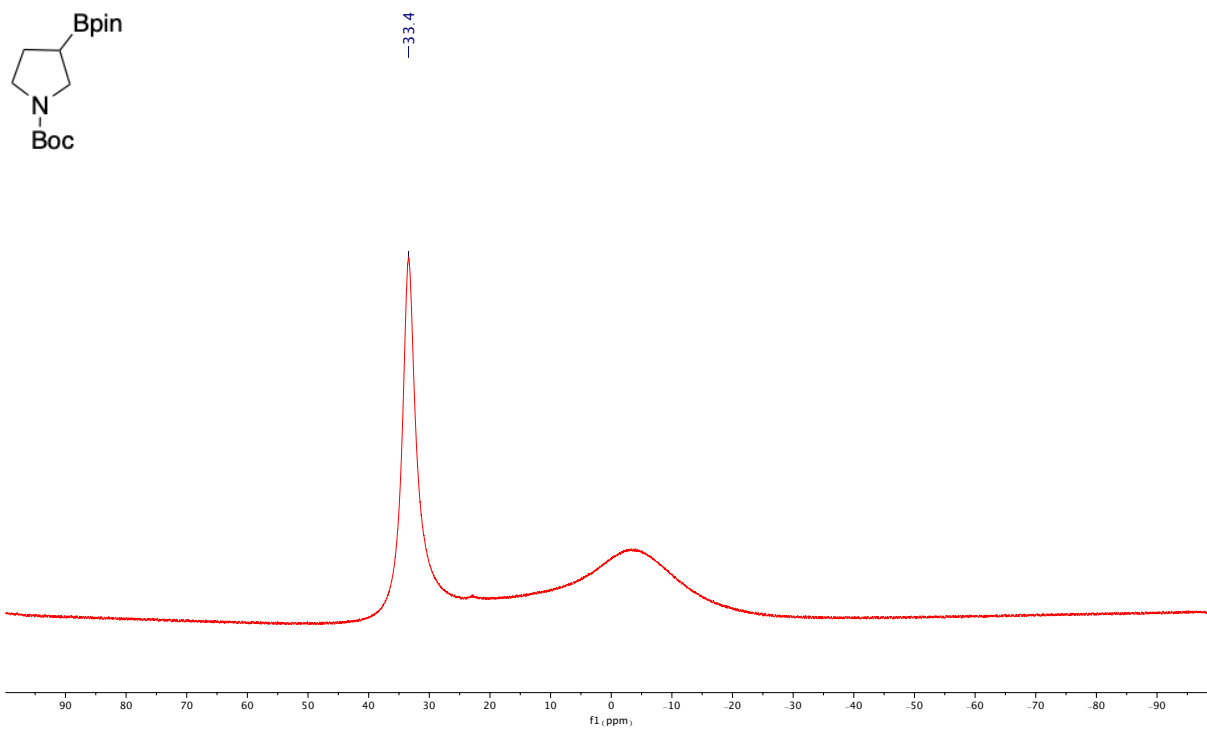

**$^1\text{H}$  NMR (500 MHz,  $\text{CDCl}_3$ ) of 4,4,5,5-tetramethyl-2-(tetrahydrofuran-2-yl)-1,3,2-dioxaborolane (2h)**

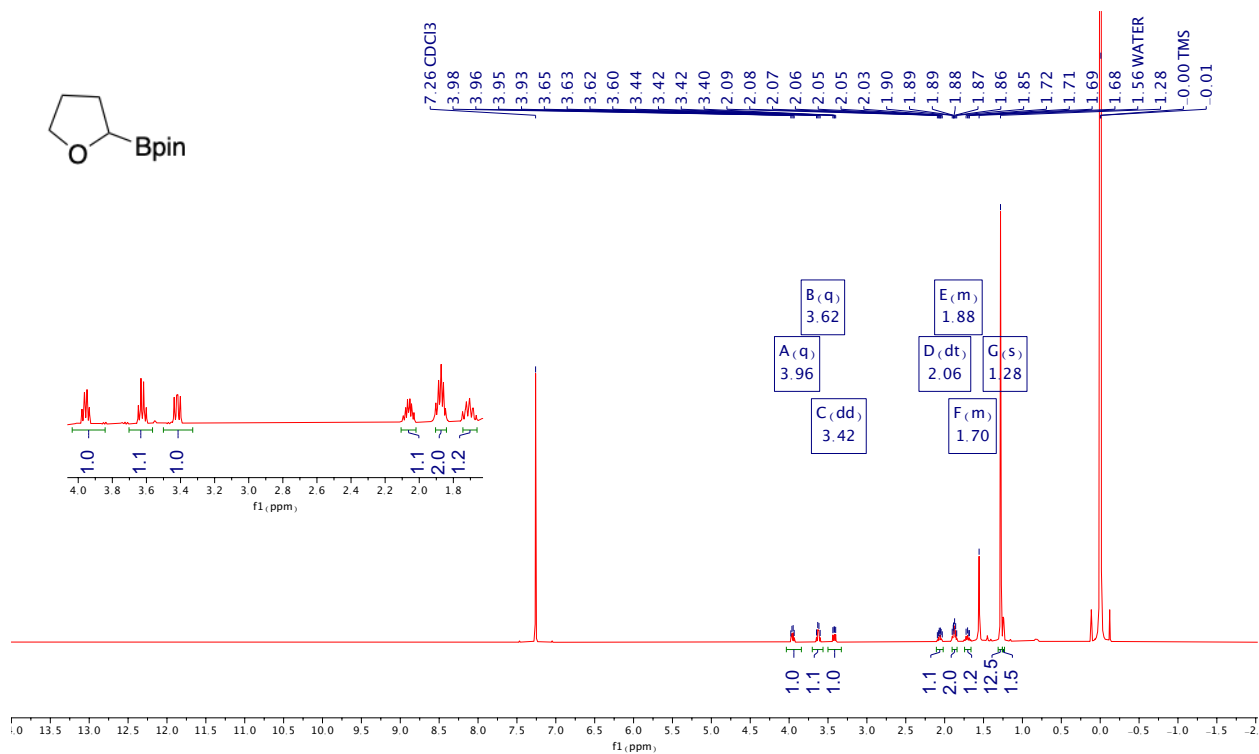

**$^{13}\text{C}\{^1\text{H}\}$  (126 MHz,  $\text{CDCl}_3$ ) NMR of 4,4,5,5-tetramethyl-2-(tetrahydrofuran-2-yl)-1,3,2-dioxaborolane (2h)**

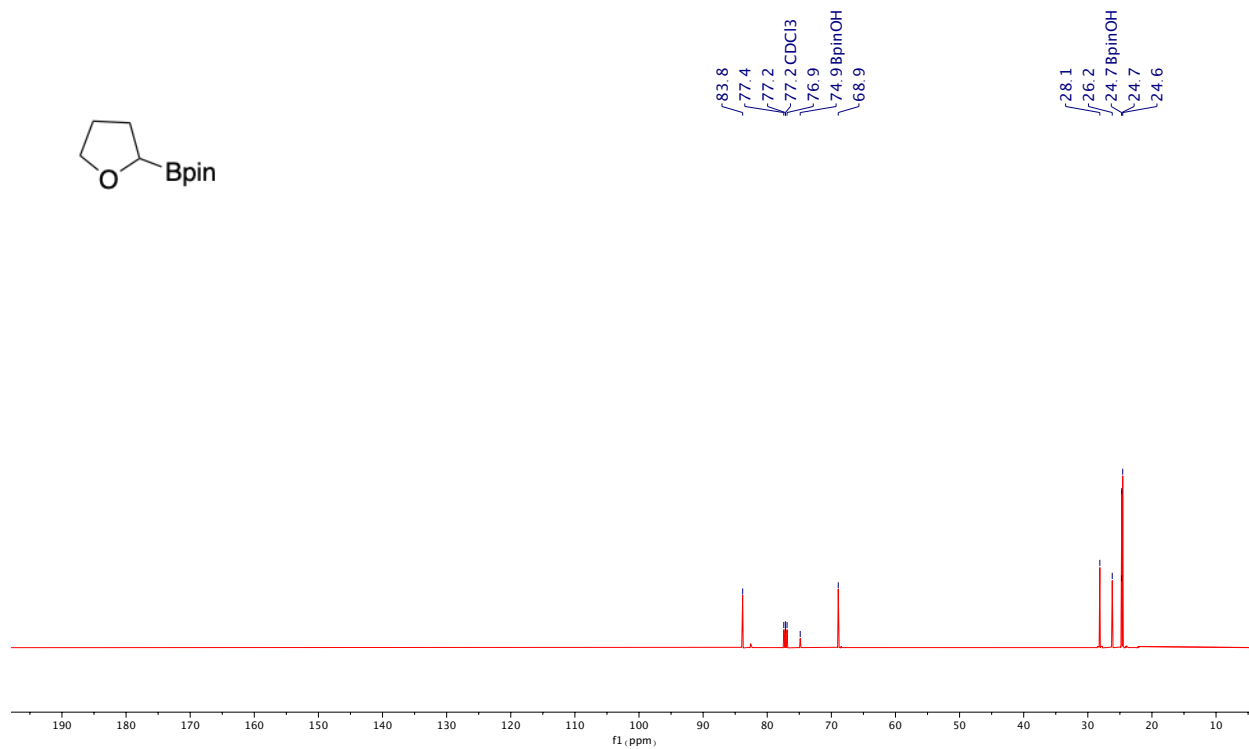

**$^{11}\text{B}$  NMR (160MHz,  $\text{CDCl}_3$ ) of 4,4,5,5-tetramethyl-2-(tetrahydrofuran-2-yl)-1,3,2-dioxaborolane (2h)**

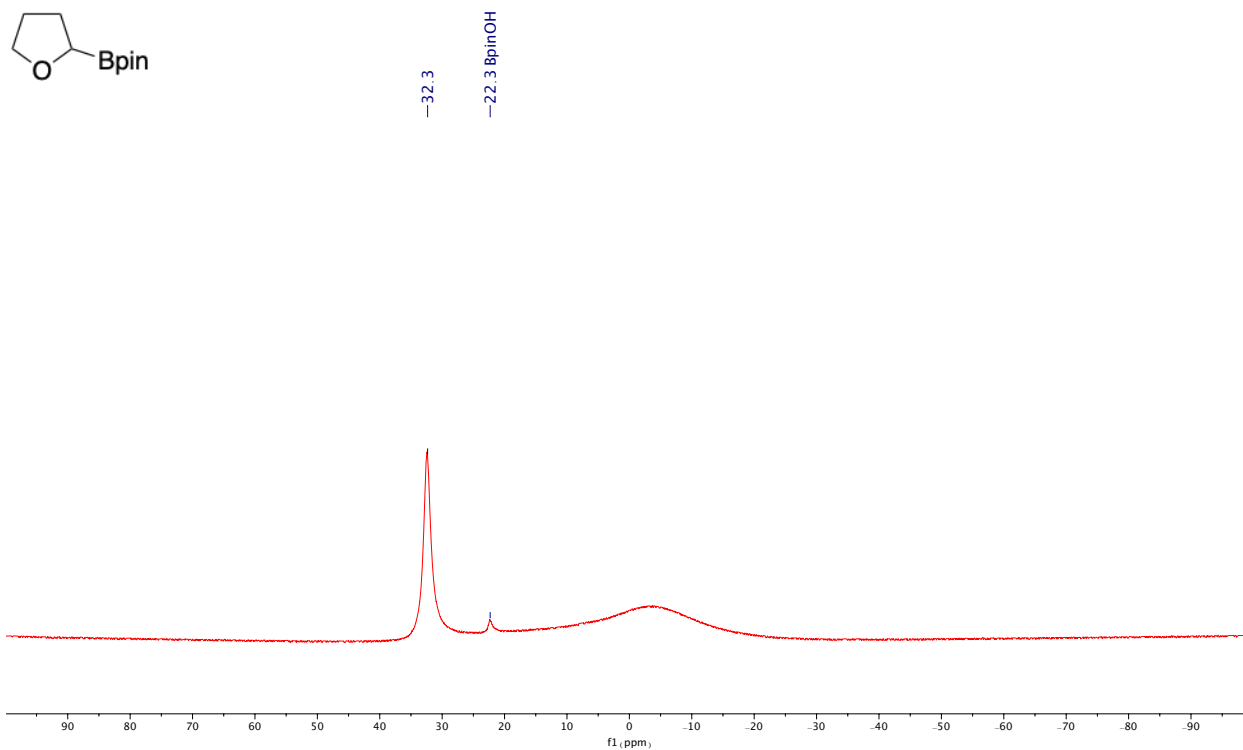

**$^1\text{H}$  NMR (500MHz,  $\text{C}_6\text{D}_6$ ) of 4,4,5,5-Tetramethyl-2-(5-methyltetrahydrofuran-2-yl)-1,3,2-dioxaborolane (2i)**

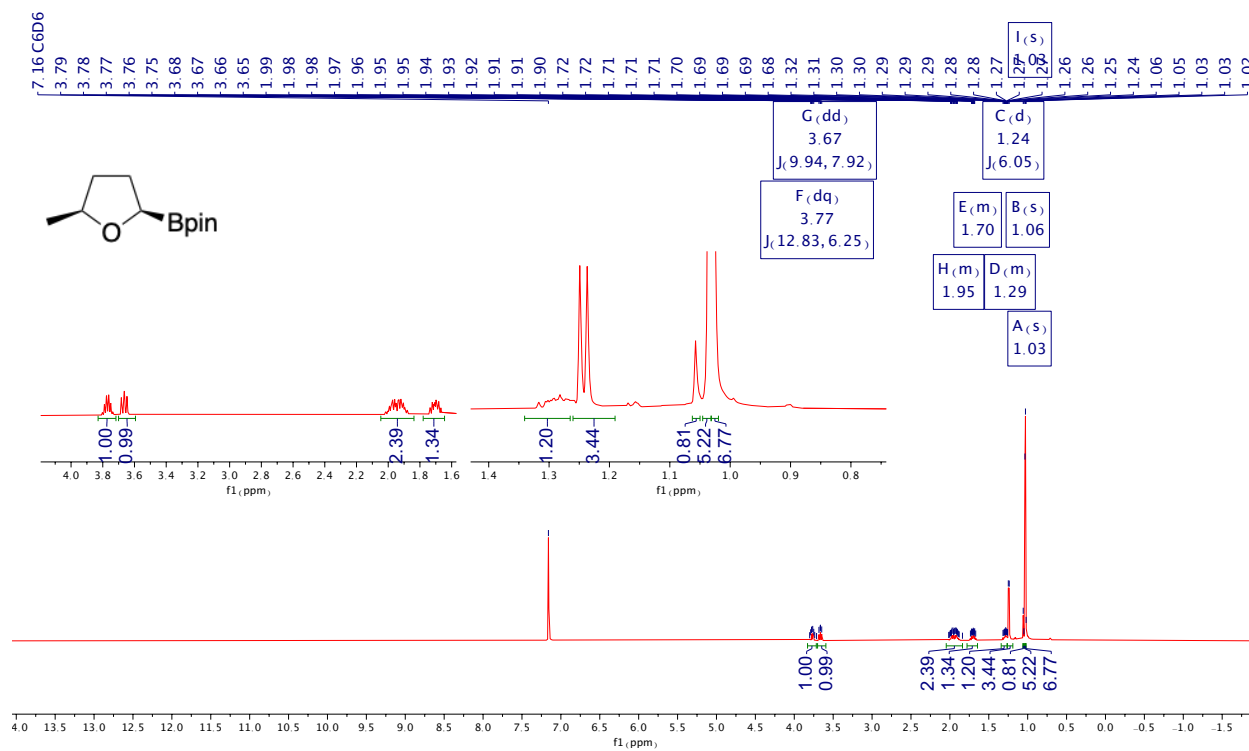

**$^{13}\text{C}\{^1\text{H}\}$  (126 MHz,  $\text{C}_6\text{D}_6$ ) NMR of 4,4,5,5-Tetramethyl-2-(5-methyltetrahydrofuran-2-yl)-1,3,2-dioxaborolane (2i)**

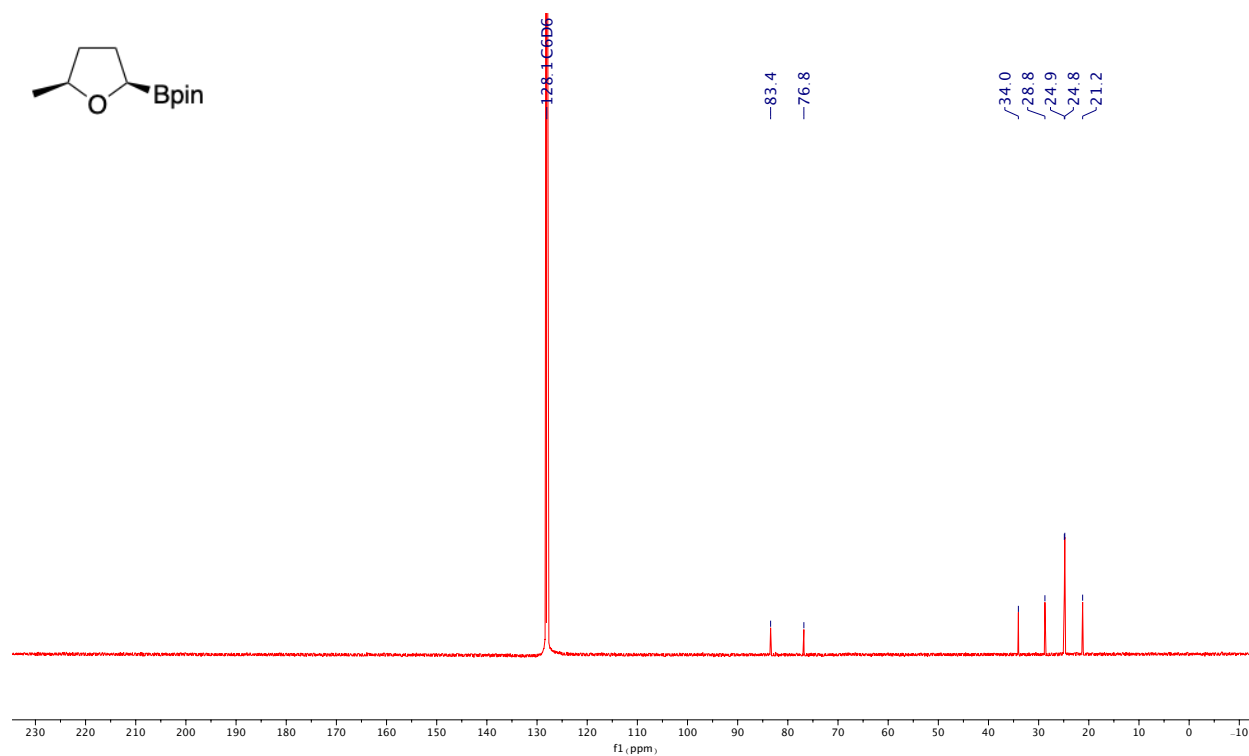

**$^{11}\text{B}$  NMR (160 MHz,  $\text{CDCl}_3$ ) of 4,4,5,5-Tetramethyl-2-(5-methyltetrahydrofuran-2-yl)-1,3,2-dioxaborolane (2i)**

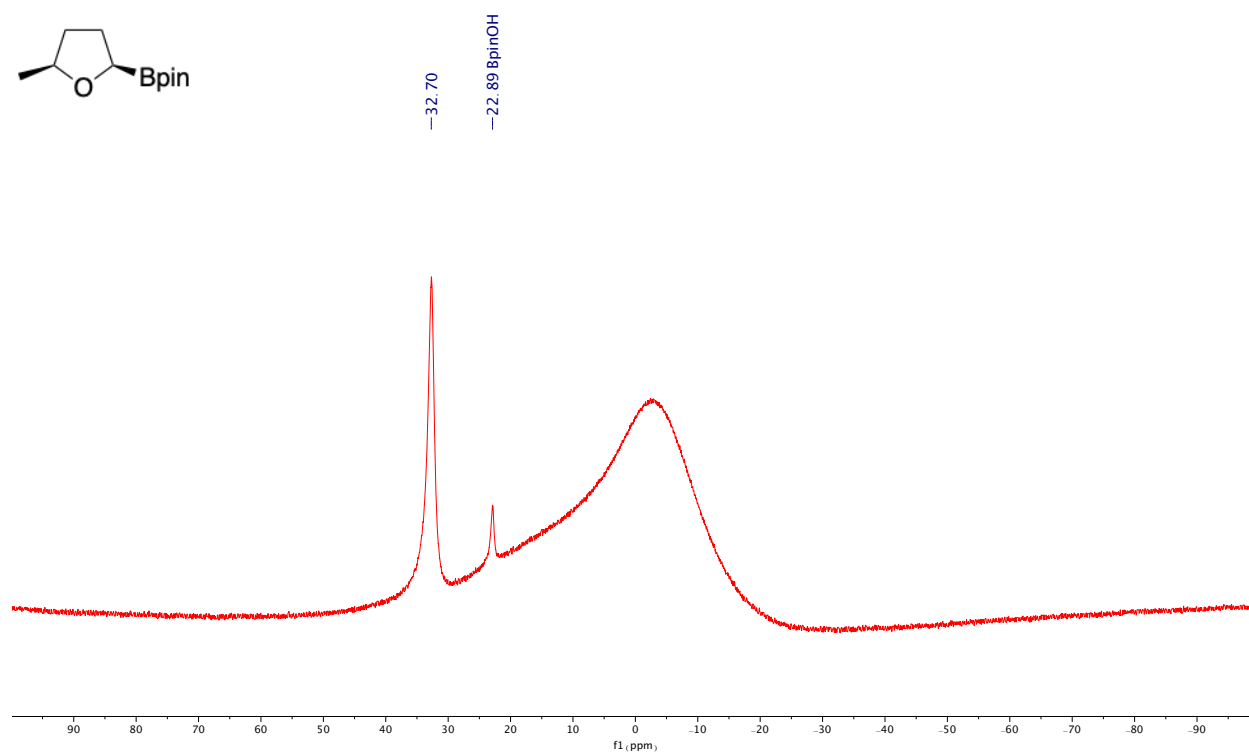

1D-NOE NMR of 4,4,5,5-Tetramethyl-2-(5-methyltetrahydrofuran-2-yl)-1,3,2-dioxaborolane (2i)

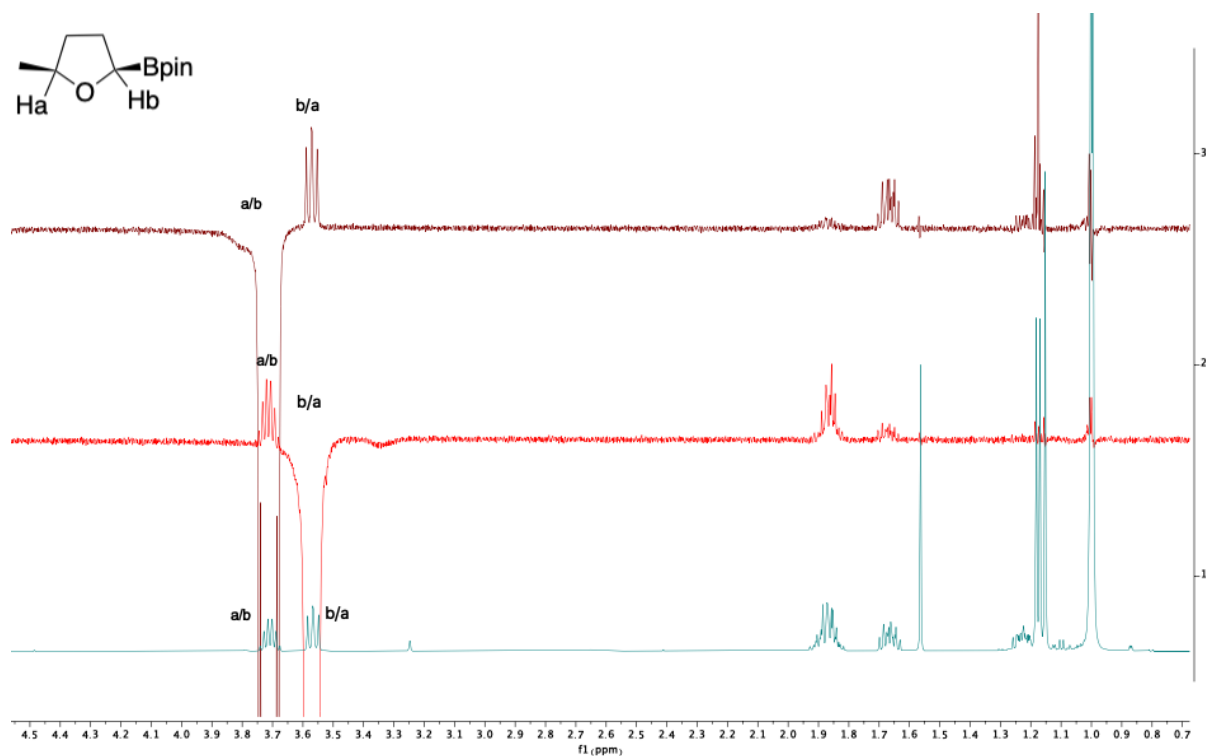

<sup>1</sup>H NMR (500MHz, CDCl<sub>3</sub>) of 4,4,5,5-tetramethyl-2-(octahydrobenzofuran-2-yl)-1,3,2-dioxaborolane (2j)

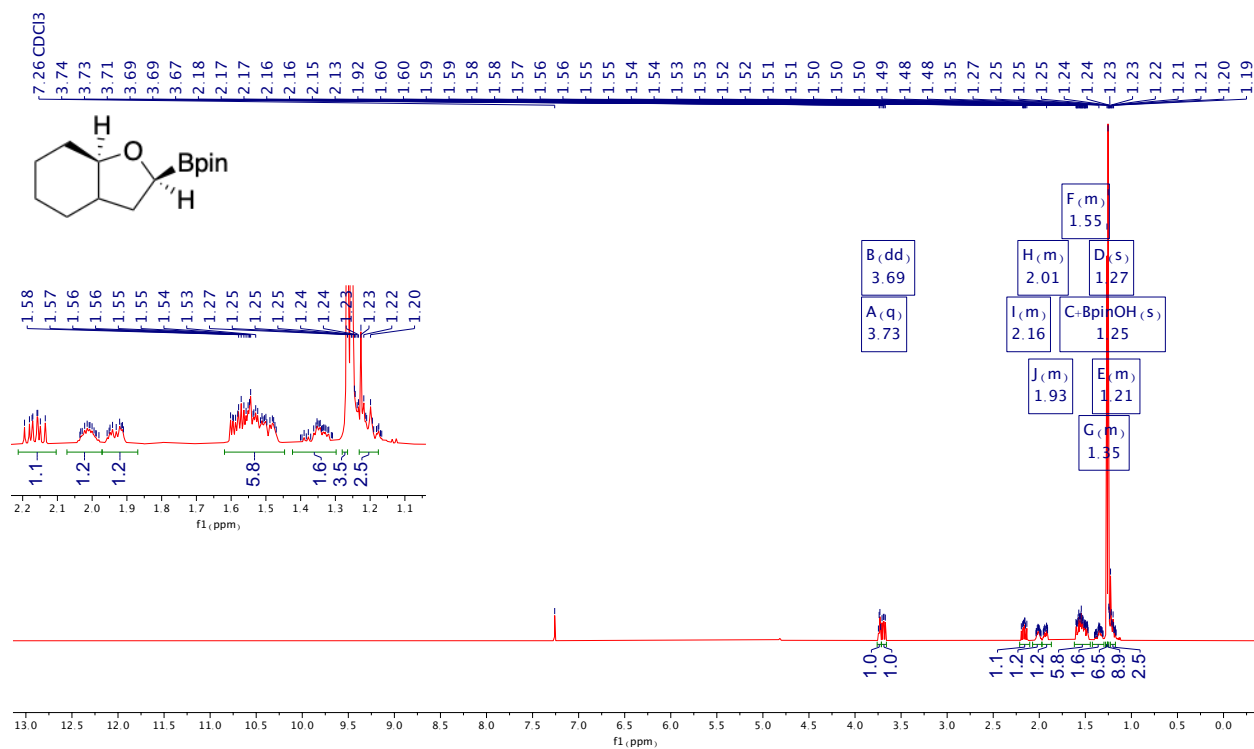

$^{13}\text{C}\{^1\text{H}\}$  (126 MHz,  $\text{CDCl}_3$ ) NMR of 4,4,5,5-tetramethyl-2-(octahydrobenzofuran-2-yl)-1,3,2-dioxaborolane (2j)

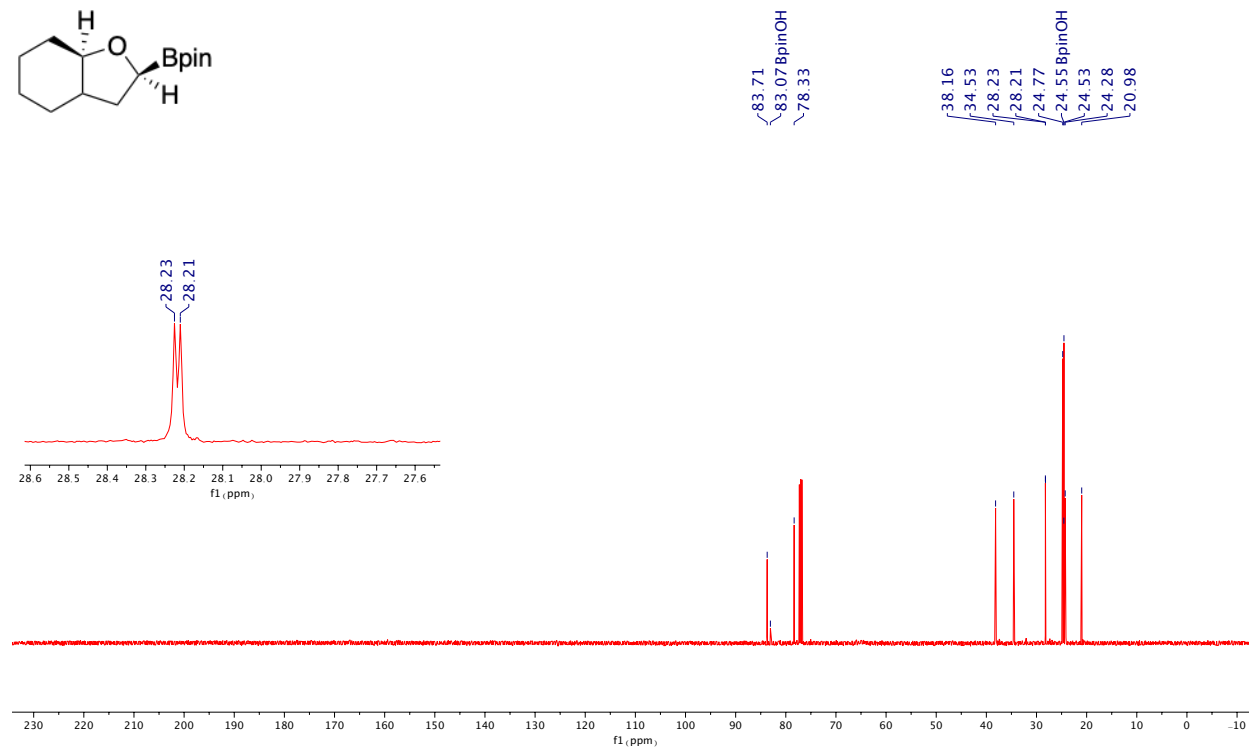

$^{11}\text{B}$  NMR (160MHz,  $\text{CDCl}_3$ ) of 4,4,5,5-tetramethyl-2-(octahydrobenzofuran-2-yl)-1,3,2-dioxaborolane (2j)

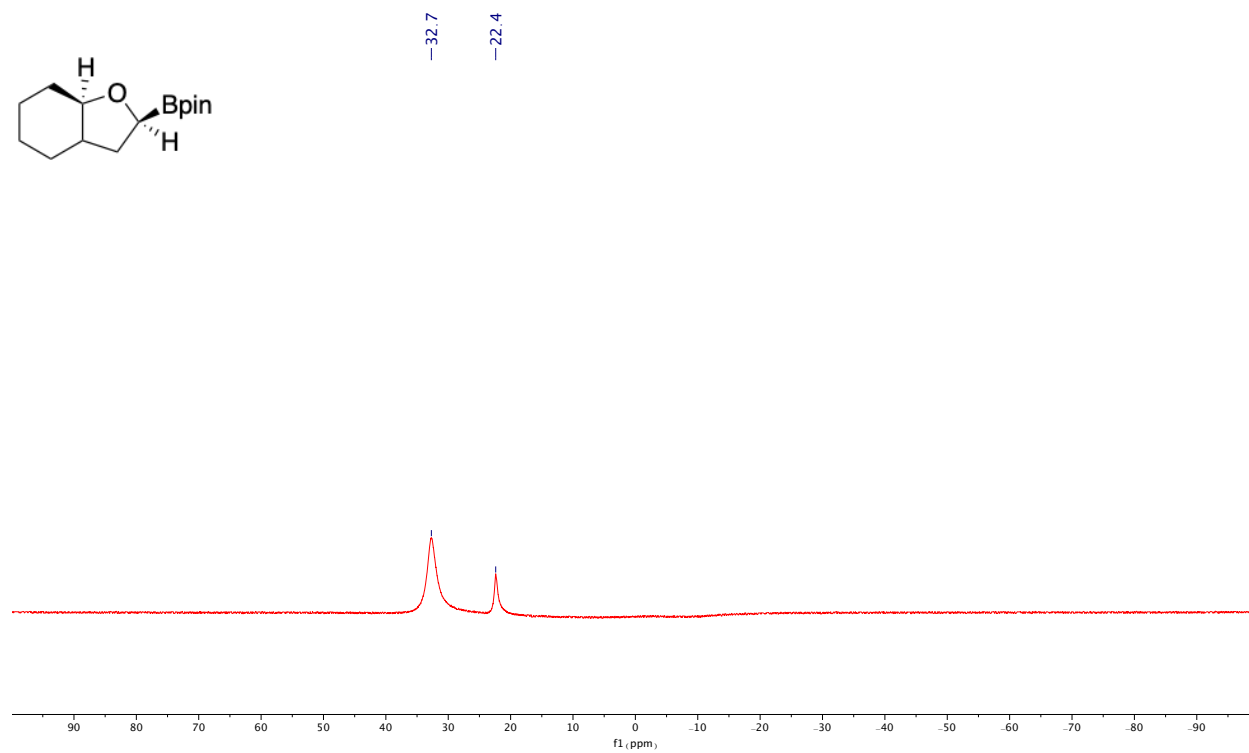

<sup>1</sup>H NMR(500MHz, CDCl<sub>3</sub>) of *t*-butyl 2-(4,4,5,5-tetramethyl-1,3,2-dioxaborolan-2-yl)octahydroindole-1-carboxylate (2l)

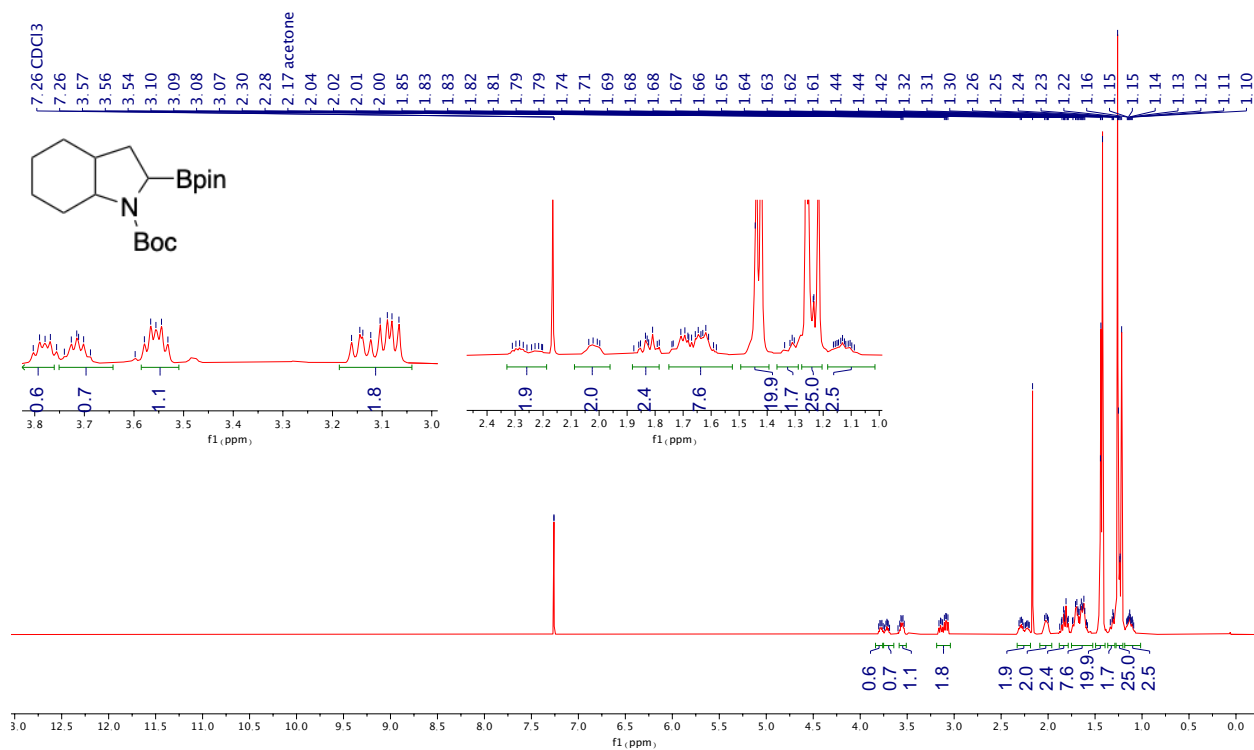

<sup>13</sup>C{<sup>1</sup>H} (126 MHz, Toluene) NMR of *t*-butyl 2-(4,4,5,5-tetramethyl-1,3,2-dioxaborolan-2-yl)octahydroindole-1-carboxylate (2l)

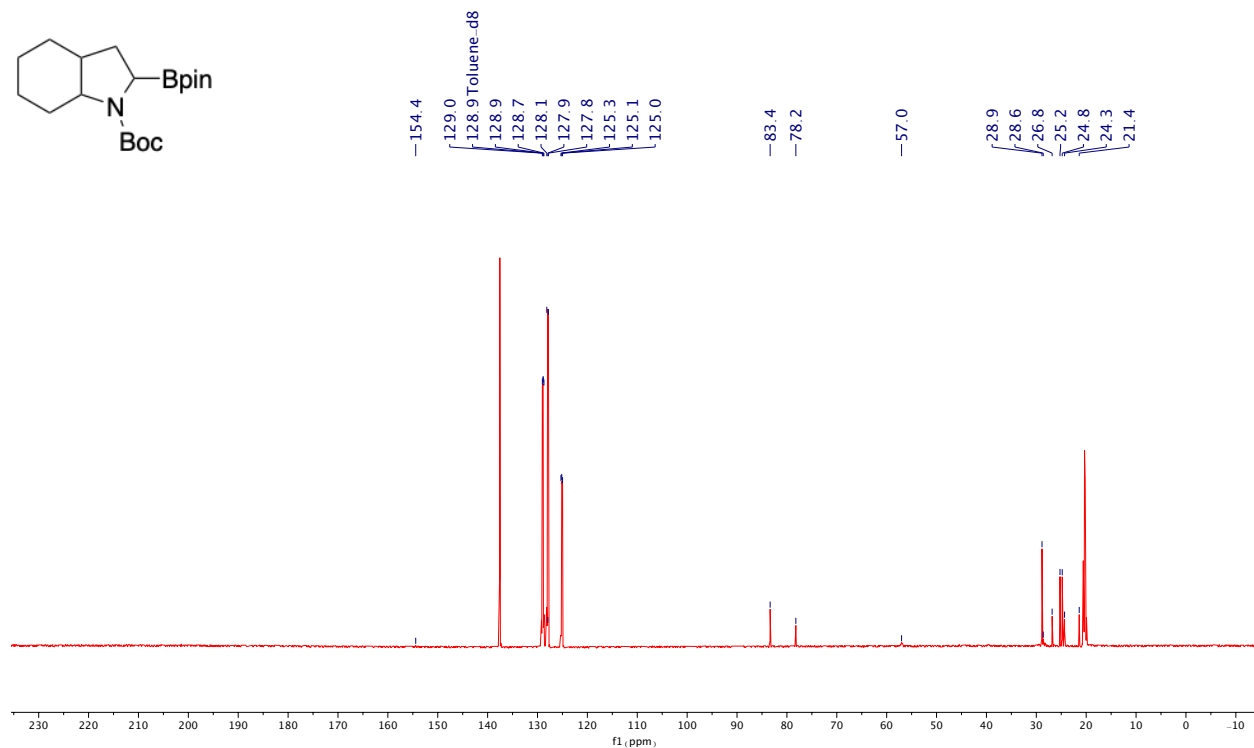

<sup>11</sup>B NMR (160MHz, CDCl<sub>3</sub>) of *t*-butyl 2-(4,4,5,5-tetramethyl-1,3,2-dioxaborolan-2-yl)octahydroindole-1-carboxylate (2l)

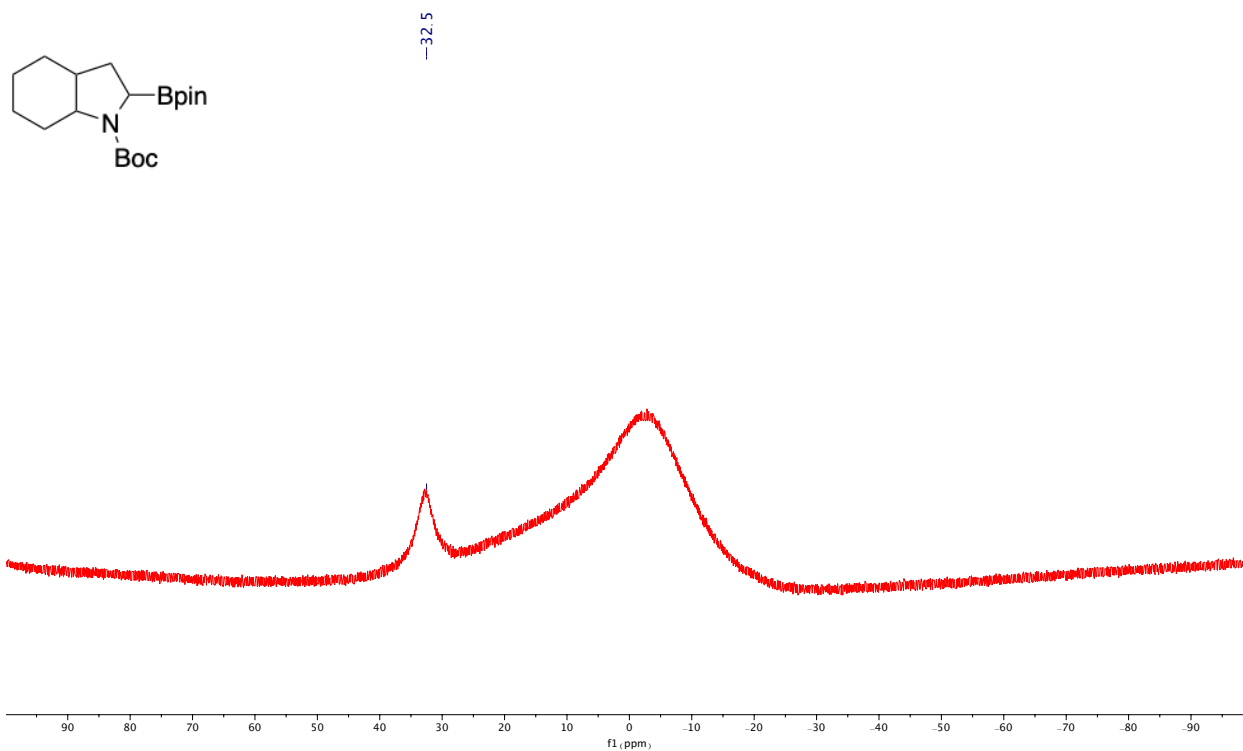

**$^1\text{H}$  NMR (500MHz,  $\text{CDCl}_3$ ) of 2-(dodecahydrodibenzo[*b,d*]furan-4-yl)-4,4,5,5-tetramethyl-1,3,2-dioxaborolane (2k)**

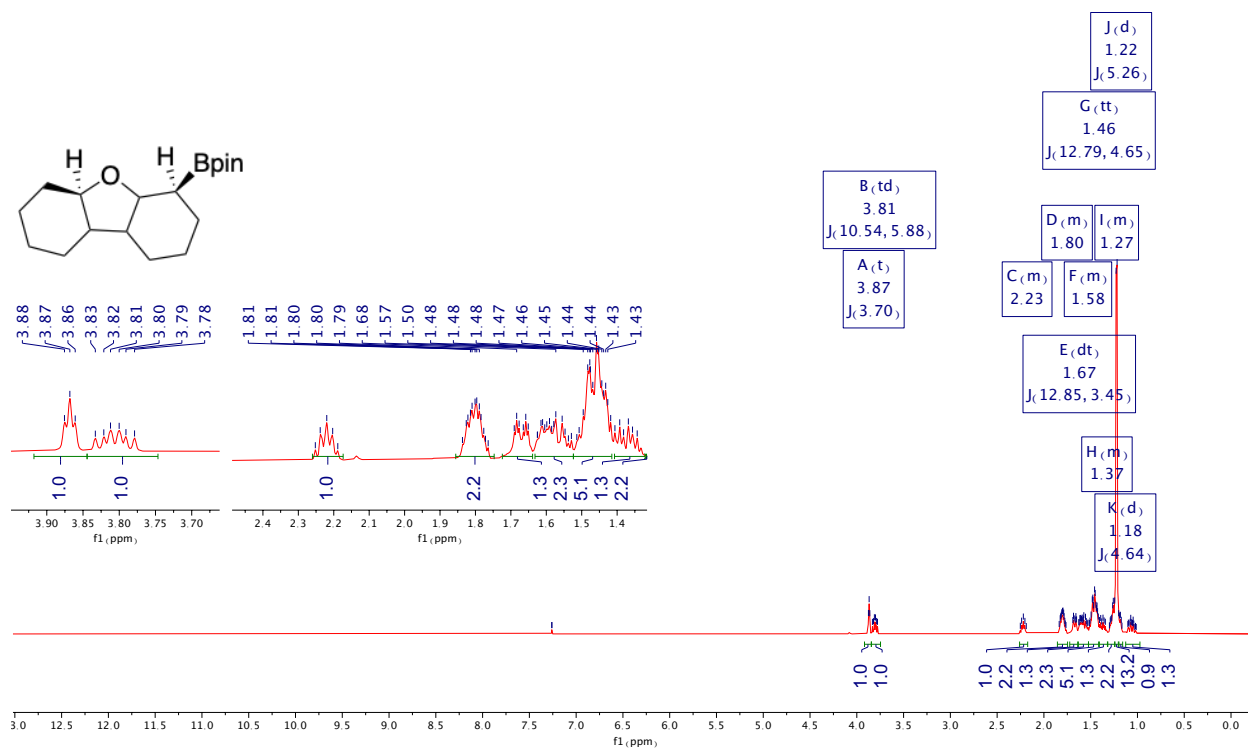

**$^{13}\text{C}\{^1\text{H}\}$  (126 MHz,  $\text{CDCl}_3$ ) NMR of 2-(dodecahydrodibenzo[*b,d*]furan-4-yl)-4,4,5,5-tetramethyl-1,3,2-dioxaborolane (2k)**

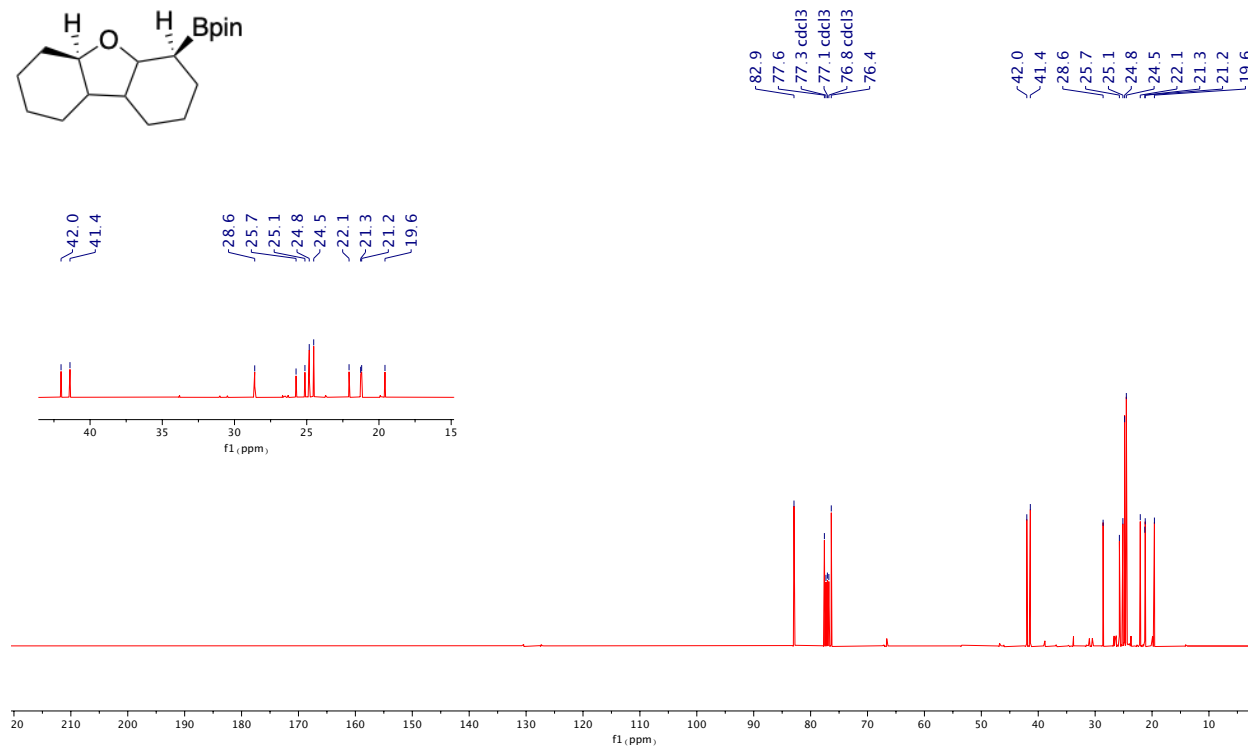

$^{11}\text{B}$  NMR (160MHz,  $\text{CDCl}_3$ ) of 2-(dodecahydrodibenzo[*b,d*]furan-4-yl)-4,4,5,5-tetramethyl-1,3,2-dioxaborolane (2k)

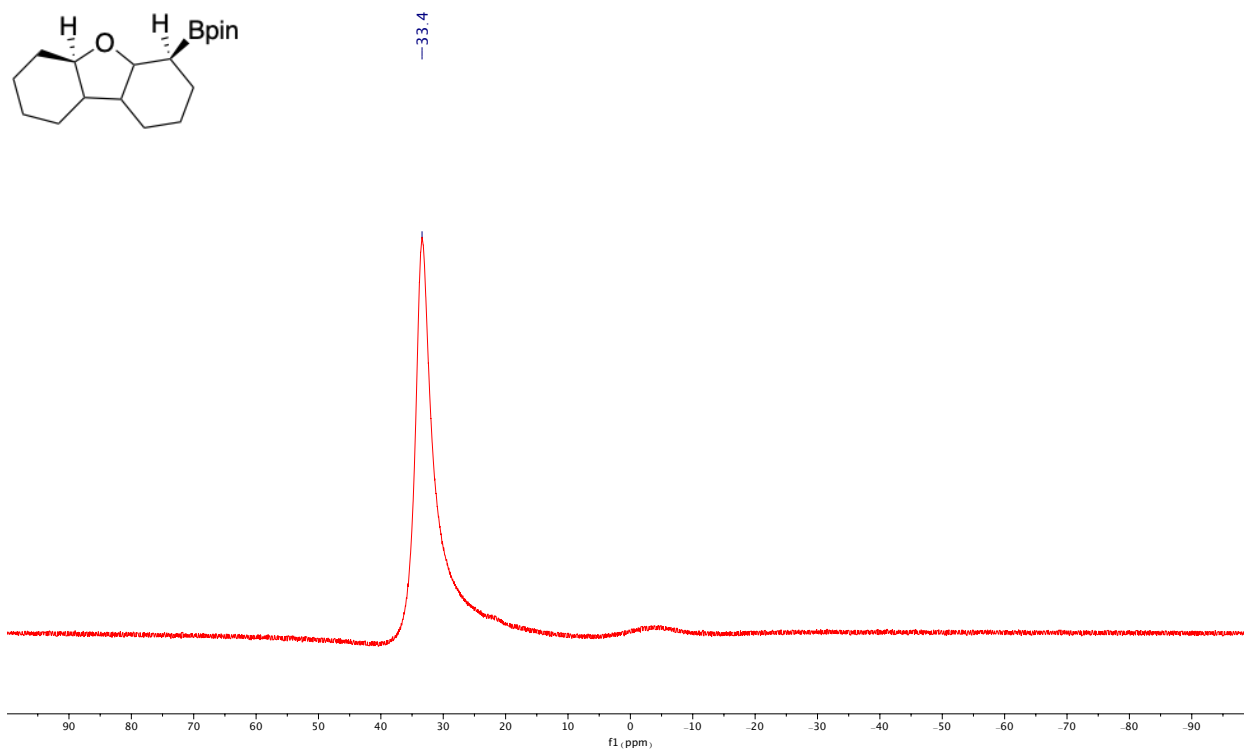

HMBC of 2-(dodecahydrodibenzo[*b,d*]furan-4-yl)-4,4,5,5-tetramethyl-1,3,2-dioxaborolane (2k)

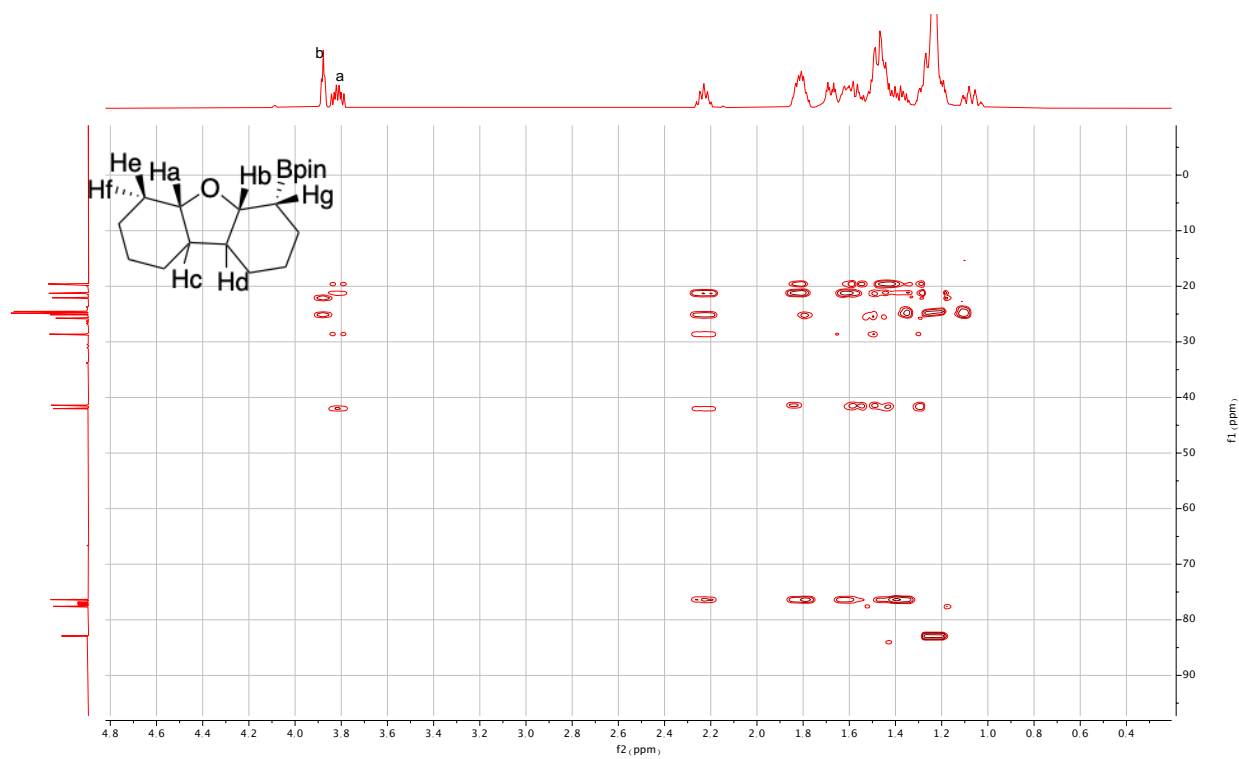

HSQC of 2-(dodecahydrodibenzo[*b,d*]furan-4-yl)-4,4,5,5-tetramethyl-1,3,2-dioxaborolane (2k)

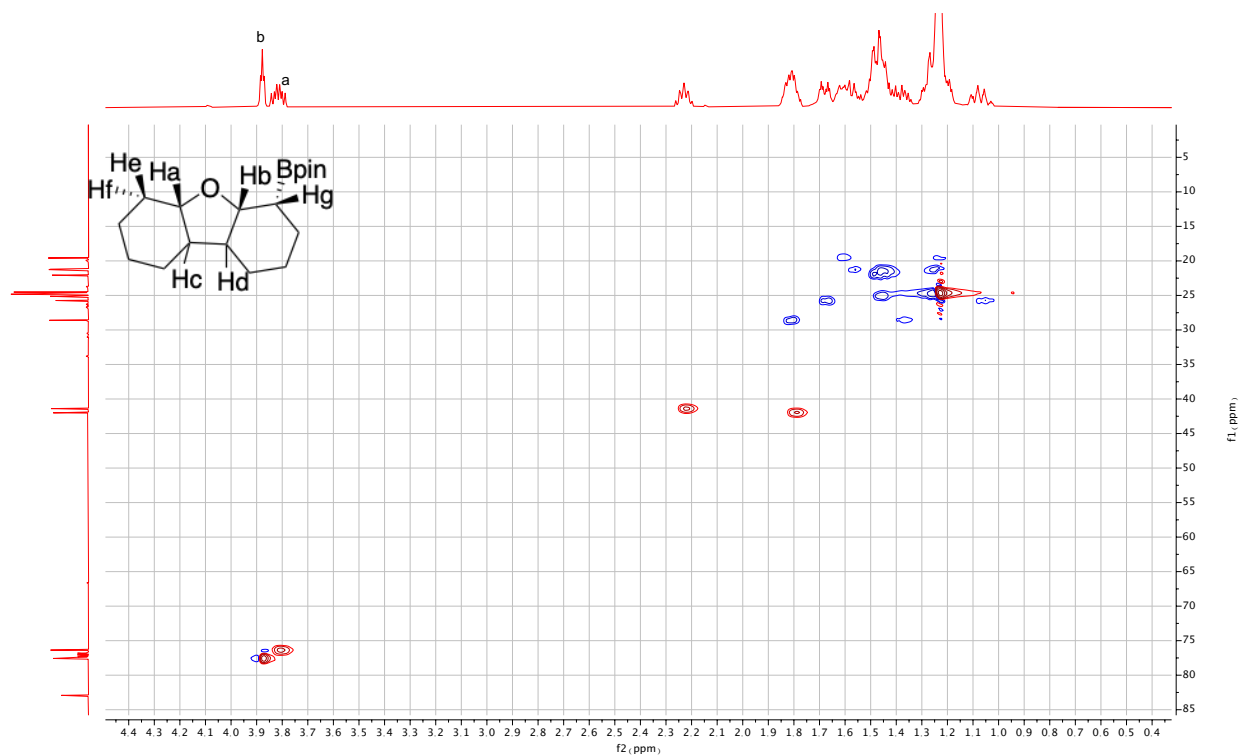

NOE of 2-(dodecahydrodibenzo[*b,d*]furan-4-yl)-4,4,5,5-tetramethyl-1,3,2-dioxaborolane (2k)

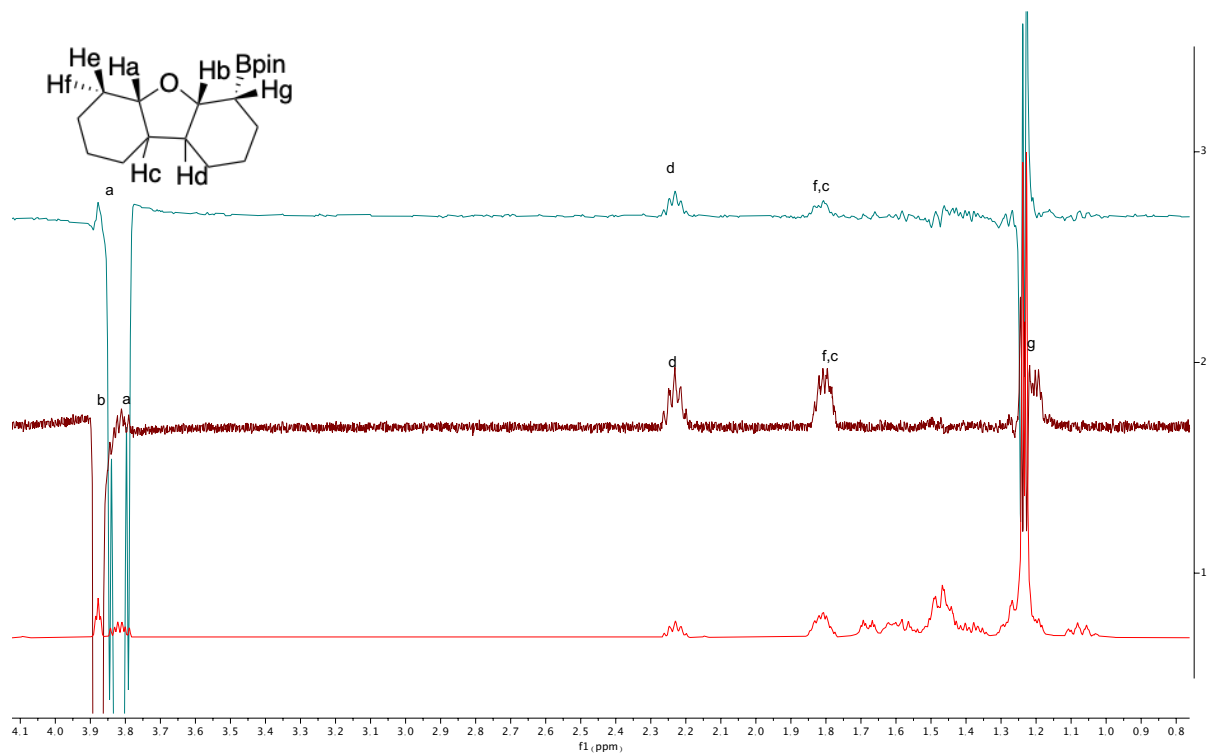

**$^1\text{H}$  NMR (500MHz,  $\text{CDCl}_3$ ) of 2-cyclohexyl-4,4,5,5-tetramethyl-1,3,2-dioxaborolane (2p)**

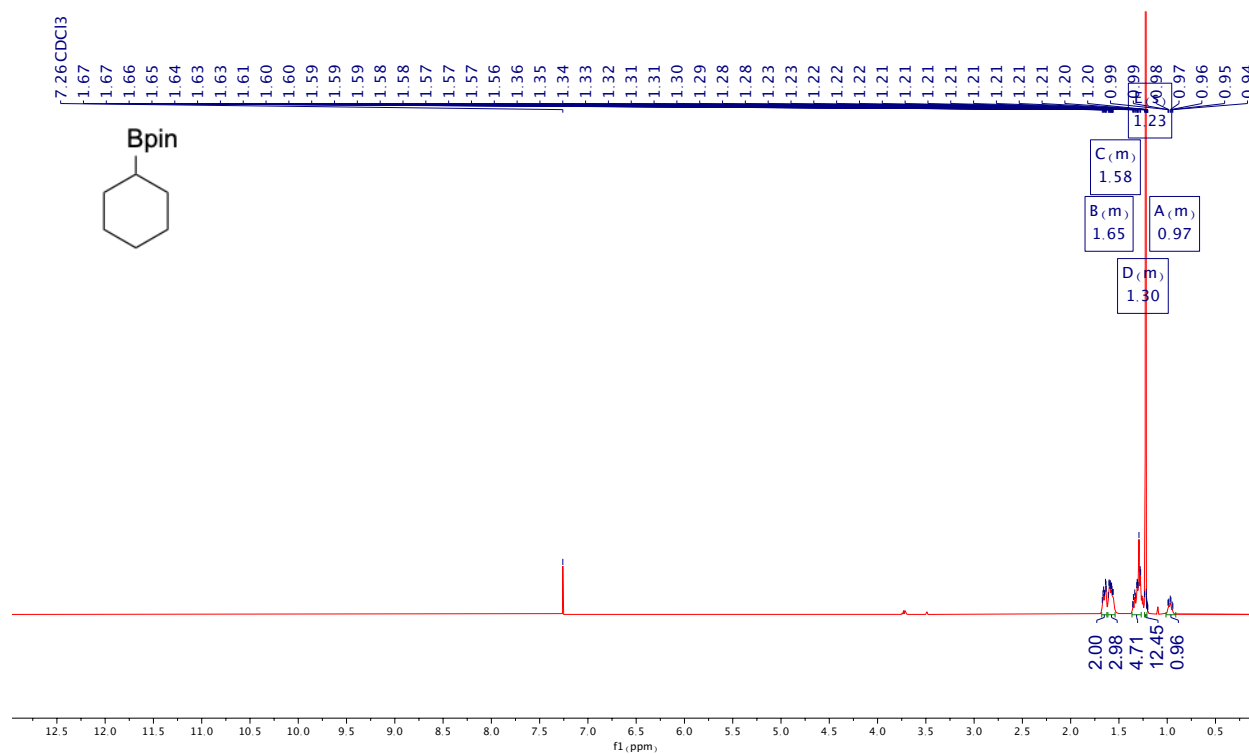

**$^{13}\text{C}\{^1\text{H}\}$  (126 MHz,  $\text{CDCl}_3$ ) NMR of 2-cyclohexyl-4,4,5,5-tetramethyl-1,3,2-dioxaborolane (2p)**

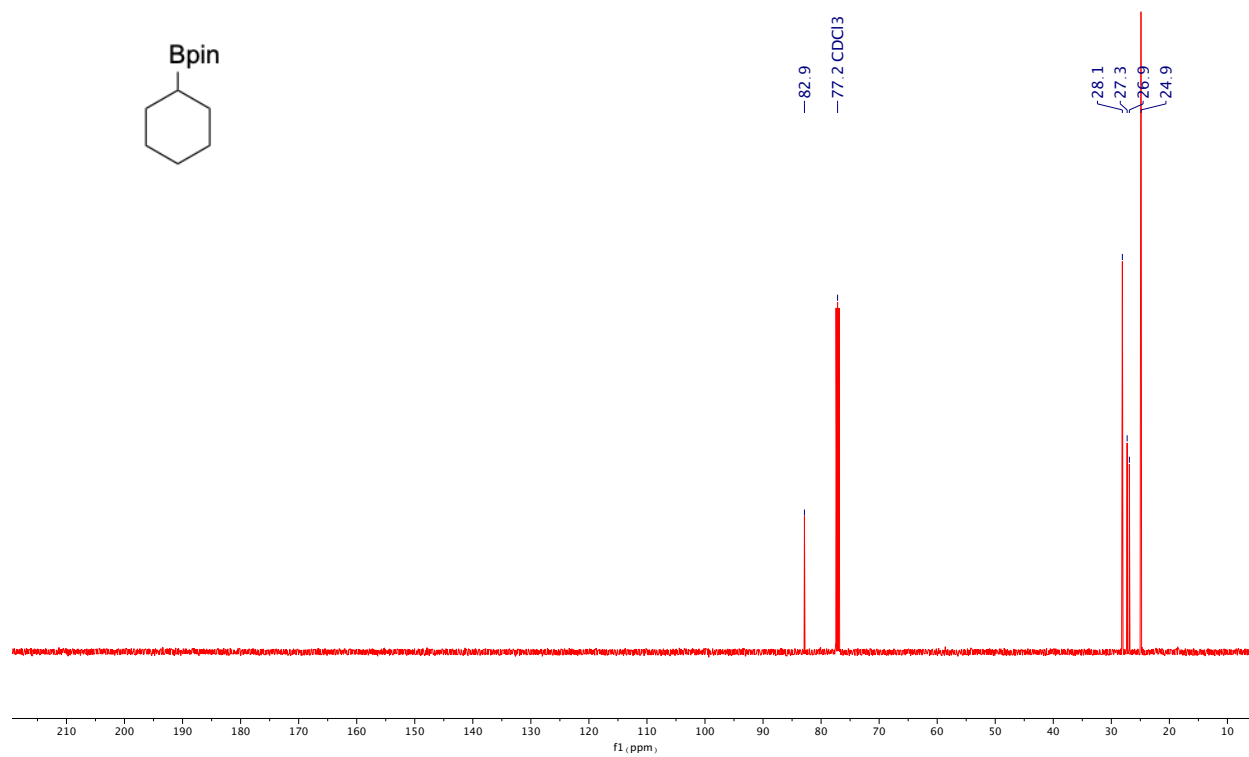

Chemical structure of Bpin (pinacolborane) is shown above the spectrum. The spectrum displays a sharp peak at approximately 3.8 ppm and a broad peak centered around -5 ppm, characteristic of the Bpin group.

Chemical structure: CC(C)(O)c1ccc(cc1)-c2ccccc2

<sup>1</sup>H NMR (400 MHz, CDCl<sub>3</sub>) data:

| Chemical Shift (ppm) | Integration | Assignment        |
|----------------------|-------------|-------------------|
| 7.26                 | -           | CDCl <sub>3</sub> |
| 7.39                 | 0.8         | Aromatic H        |
| 7.59                 | 1.0         | Aromatic H        |
| 1.77                 | 1.1         | CH                |
| 1.65                 | 1.8         | CH <sub>3</sub>   |
| 1.58                 | 1.9         | CH <sub>3</sub>   |
| 1.53                 | 2.1         | CH <sub>3</sub>   |
| 1.52                 | 3.7         | CH <sub>3</sub>   |
| 1.51                 | 6.3         | CH <sub>3</sub>   |
| 1.50                 | 24.8        | CH <sub>3</sub>   |
| 1.49                 | 1.5         | CH <sub>3</sub>   |
| 1.42                 | 1.4         | CH <sub>3</sub>   |
| 1.41                 | 1.4         | CH <sub>3</sub>   |
| 1.39                 | 1.4         | CH <sub>3</sub>   |
| 1.37                 | 1.4         | CH <sub>3</sub>   |
| 1.36                 | 1.4         | CH <sub>3</sub>   |
| 1.35                 | 1.4         | CH <sub>3</sub>   |
| 1.34                 | 1.4         | CH <sub>3</sub>   |
| 1.29                 | 1.4         | CH <sub>3</sub>   |
| 1.27                 | 1.4         | CH <sub>3</sub>   |
| 1.25                 | 1.4         | CH <sub>3</sub>   |
| 1.23                 | 1.4         | CH <sub>3</sub>   |

<sup>13</sup>C NMR (100 MHz, CDCl<sub>3</sub>) data:

| Chemical Shift (ppm) | Assignment      |
|----------------------|-----------------|
| 15.1                 | CH <sub>3</sub> |
| 15.4                 | CH <sub>3</sub> |
| 15.5                 | CH <sub>3</sub> |
| 15.6                 | CH <sub>3</sub> |
| 15.7                 | CH <sub>3</sub> |
| 15.8                 | CH <sub>3</sub> |
| 15.9                 | CH <sub>3</sub> |
| 16.0                 | CH <sub>3</sub> |
| 16.1                 | CH <sub>3</sub> |
| 16.2                 | CH <sub>3</sub> |
| 16.3                 | CH <sub>3</sub> |
| 16.4                 | CH <sub>3</sub> |
| 16.5                 | CH <sub>3</sub> |
| 16.6                 | CH <sub>3</sub> |
| 16.7                 | CH <sub>3</sub> |
| 16.8                 | CH <sub>3</sub> |
| 16.9                 | CH <sub>3</sub> |
| 17.0                 | CH <sub>3</sub> |
| 17.1                 | CH <sub>3</sub> |
| 17.2                 | CH <sub>3</sub> |
| 17.3                 | CH <sub>3</sub> |
| 17.4                 | CH <sub>3</sub> |
| 17.5                 | CH <sub>3</sub> |
| 17.6                 | CH <sub>3</sub> |
| 17.7                 | CH <sub>3</sub> |
| 17.8                 | CH <sub>3</sub> |
| 17.9                 | CH <sub>3</sub> |
| 18.0                 | CH <sub>3</sub> |
| 18.1                 | CH <sub>3</sub> |
| 18.2                 | CH <sub>3</sub> |
| 18.3                 | CH <sub>3</sub> |
| 18.4                 | CH <sub>3</sub> |
| 18.5                 | CH <sub>3</sub> |
| 18.6                 | CH <sub>3</sub> |
| 18.7                 | CH <sub>3</sub> |
| 18.8                 | CH <sub>3</sub> |
| 18.9                 | CH <sub>3</sub> |
| 19.0                 | CH <sub>3</sub> |
| 19.1                 | CH <sub>3</sub> |
| 19.2                 | CH <sub>3</sub> |
| 19.3                 | CH <sub>3</sub> |
| 19.4                 | CH <sub>3</sub> |
| 19.5                 | CH <sub>3</sub> |
| 19.6                 | CH <sub>3</sub> |
| 19.7                 | CH <sub>3</sub> |
| 19.8                 | CH <sub>3</sub> |
| 19.9                 | CH <sub>3</sub> |
| 20.0                 | CH <sub>3</sub> |
| 20.1                 | CH <sub>3</sub> |
| 20.2                 | CH <sub>3</sub> |
| 20.3                 | CH <sub>3</sub> |
| 20.4                 | CH <sub>3</sub> |
| 20.5                 | CH <sub>3</sub> |
| 20.6                 | CH <sub>3</sub> |
| 20.7                 | CH <sub>3</sub> |
| 20.8                 | CH <sub>3</sub> |
| 20.9                 | CH <sub>3</sub> |
| 21.0                 | CH <sub>3</sub> |
| 21.1                 | CH <sub>3</sub> |
| 21.2                 | CH <sub>3</sub> |
| 21.3                 | CH <sub>3</sub> |
| 21.4                 | CH <sub>3</sub> |
| 21.5                 | CH <sub>3</sub> |
| 21.6                 | CH <sub>3</sub> |
| 21.7                 | CH <sub>3</sub> |
| 21.8                 | CH <sub>3</sub> |
| 21.9                 | CH <sub>3</sub> |
| 22.0                 | CH <sub>3</sub> |
| 22.1                 | CH <sub>3</sub> |
| 22.2                 | CH <sub>3</sub> |
| 22.3                 | CH <sub>3</sub> |
| 22.4                 | CH <sub>3</sub> |
| 22.5                 | CH <sub>3</sub> |
| 22.6                 | CH <sub>3</sub> |
| 22.7                 | CH <sub>3</sub> |
| 22.8                 | CH <sub>3</sub> |
| 22.9                 | CH <sub>3</sub> |
| 23.0                 | CH <sub>3</sub> |
| 23.1                 | CH <sub>3</sub> |
| 23.2                 | CH <sub>3</sub> |
| 23.3                 | CH <sub>3</sub> |
| 23.4                 | CH <sub>3</sub> |
| 23.5                 | CH <sub>3</sub> |
| 23.6                 | CH <sub>3</sub> |
| 23.7                 | CH <sub>3</sub> |
| 23.8                 | CH <sub>3</sub> |
| 23.9                 | CH <sub>3</sub> |
| 24.0                 | CH <sub>3</sub> |
| 24.1                 | CH <sub>3</sub> |
| 24.2                 | CH <sub>3</sub> |
| 24.3                 | CH <sub>3</sub> |
| 24.4                 | CH <sub>3</sub> |
| 24.5                 | CH <sub>3</sub> |
| 24.6                 | CH <sub>3</sub> |
| 24.7                 | CH <sub>3</sub> |
| 24.8                 | CH <sub>3</sub> |
| 24.9                 | CH <sub>3</sub> |
| 25.0                 | CH <sub>3</sub> |
| 25.1                 | CH<             |

$^{13}\text{C}\{^1\text{H}\}$  (126 MHz,  $\text{CDCl}_3$ ) NMR of 3-(4,4,5,5-tetramethyl-1,3,2-dioxaborolan-2-yl)cyclohexan-1-ol (2q)

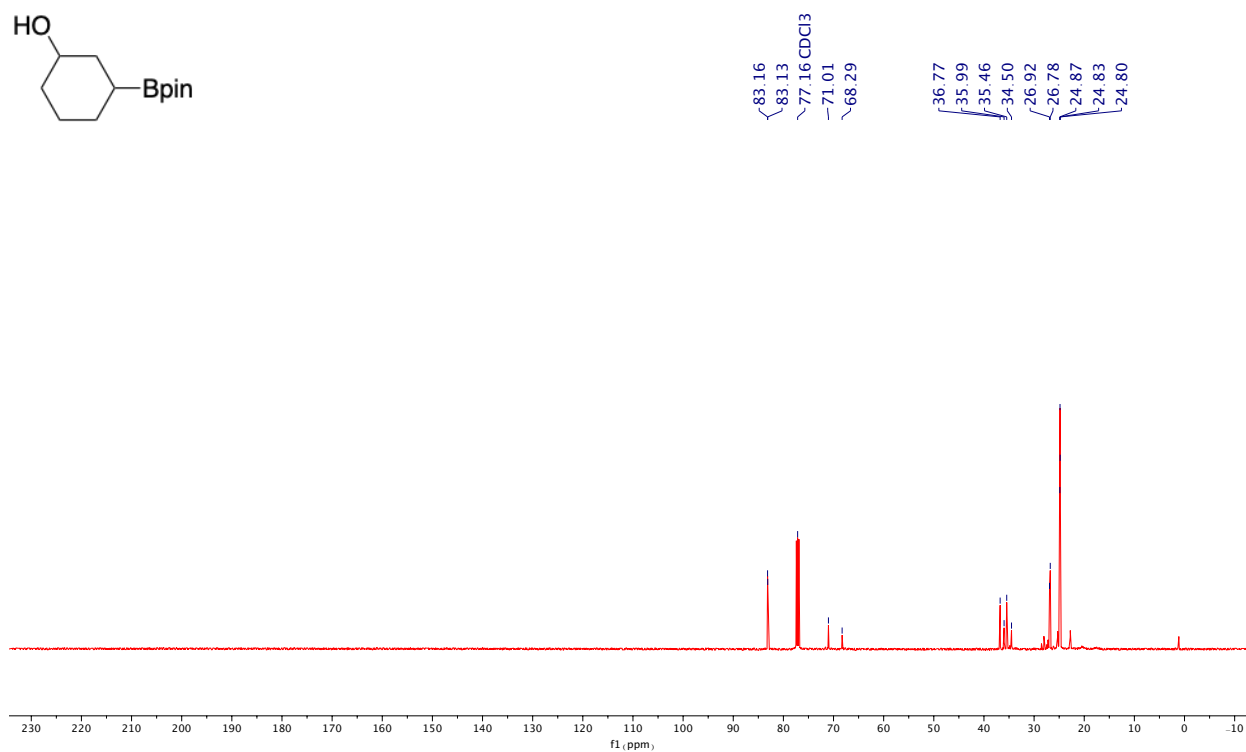

$^{11}\text{B}$  NMR (160 MHz,  $\text{CDCl}_3$ ) of 3-(4,4,5,5-tetramethyl-1,3,2-dioxaborolan-2-yl)cyclohexan-1-ol (2q)

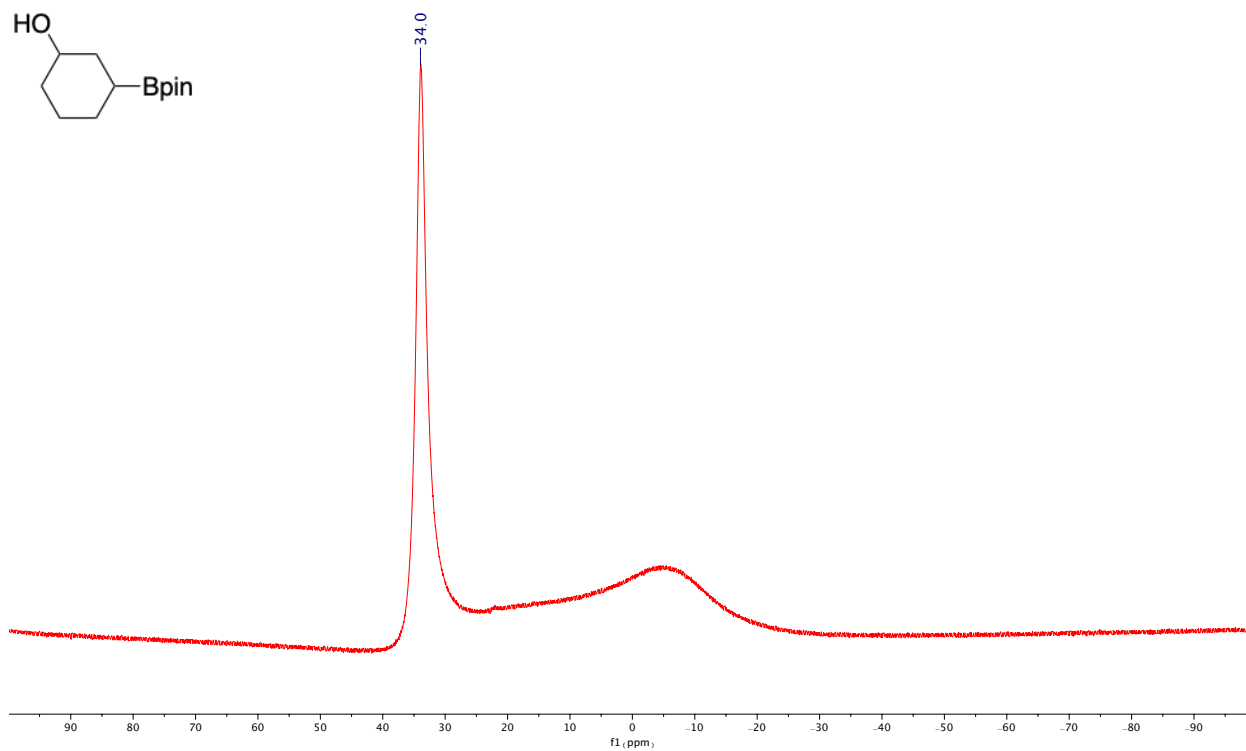

**$^1\text{H}$  NMR (500MHz,  $\text{CDCl}_3$ ) of 4,4,5,5-tetramethyl-2-(-3-(trifluoromethyl)cyclohexyl)-1,3,2-dioxaborolane (2r)**

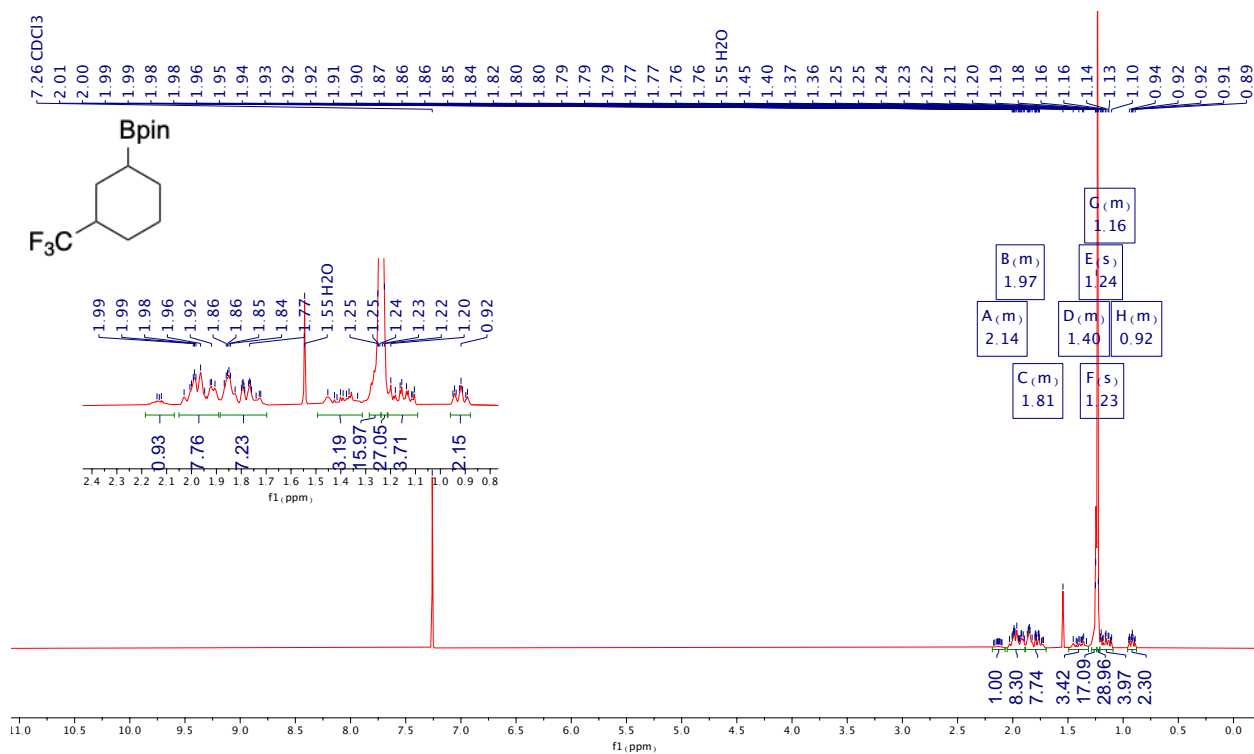

**$^{13}\text{C}\{^1\text{H}\}$  (126 MHz,  $\text{CDCl}_3$ ) NMR of 4,4,5,5-tetramethyl-2-(-3-(trifluoromethyl)cyclohexyl)-1,3,2-dioxaborolane (2r)**

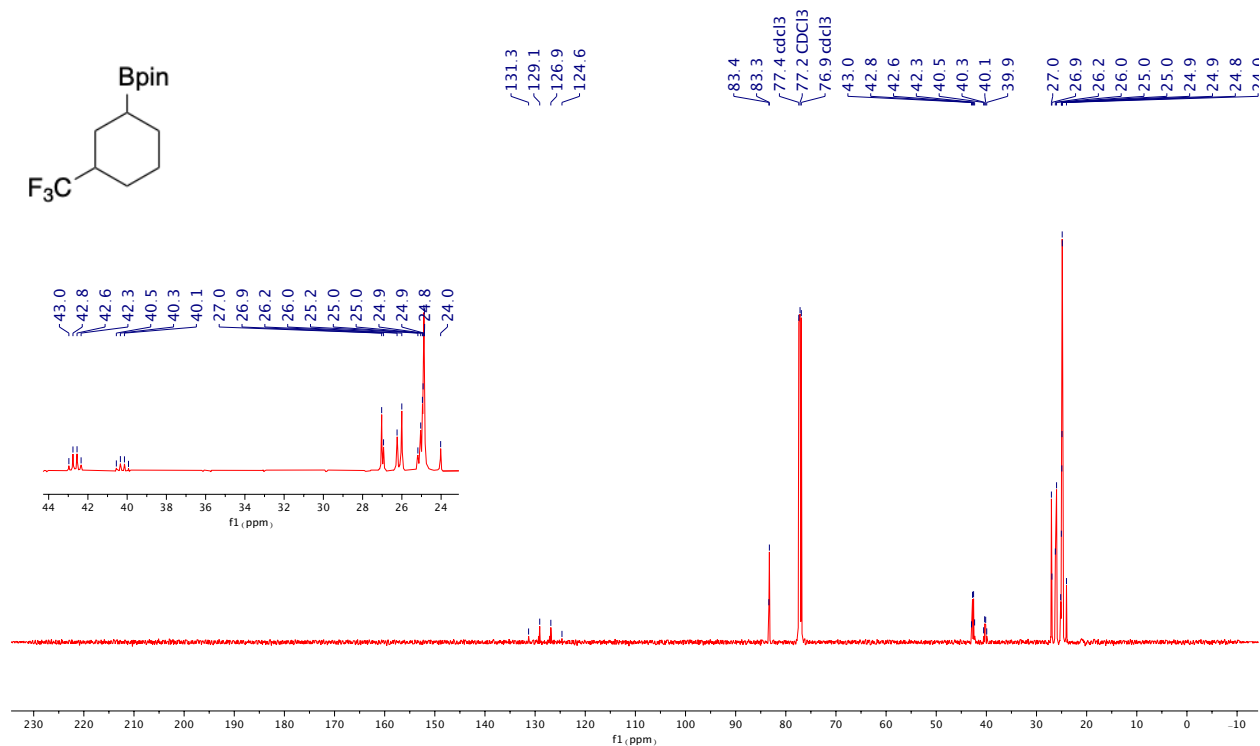

**$^{11}\text{B}$  NMR (160MHz,  $\text{CDCl}_3$ ) of 4,4,5,5-tetramethyl-2-(-3-(trifluoromethyl)cyclohexyl)-1,3,2-dioxaborolane (2r)**

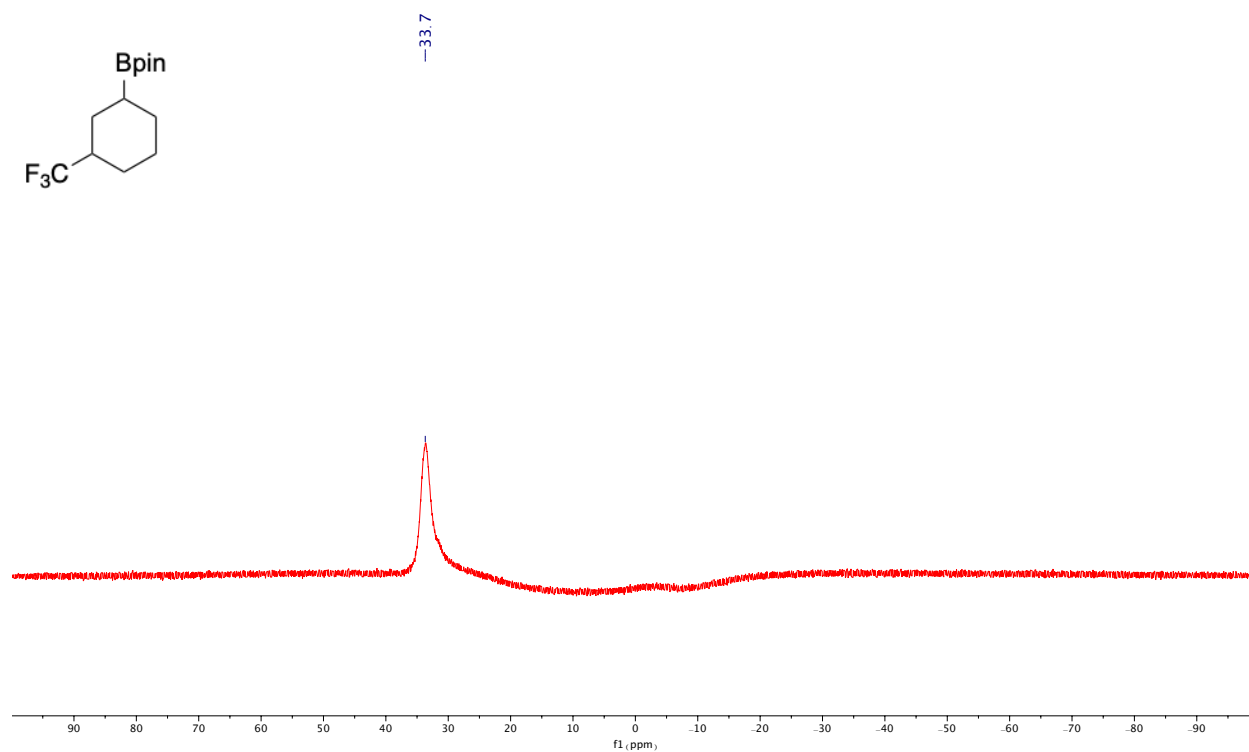

**$^{19}\text{F}$  NMR (470 MHz,  $\text{CDCl}_3$ ) of 4,4,5,5-tetramethyl-2-(-3-(trifluoromethyl)cyclohexyl)-1,3,2-dioxaborolane (2r)**

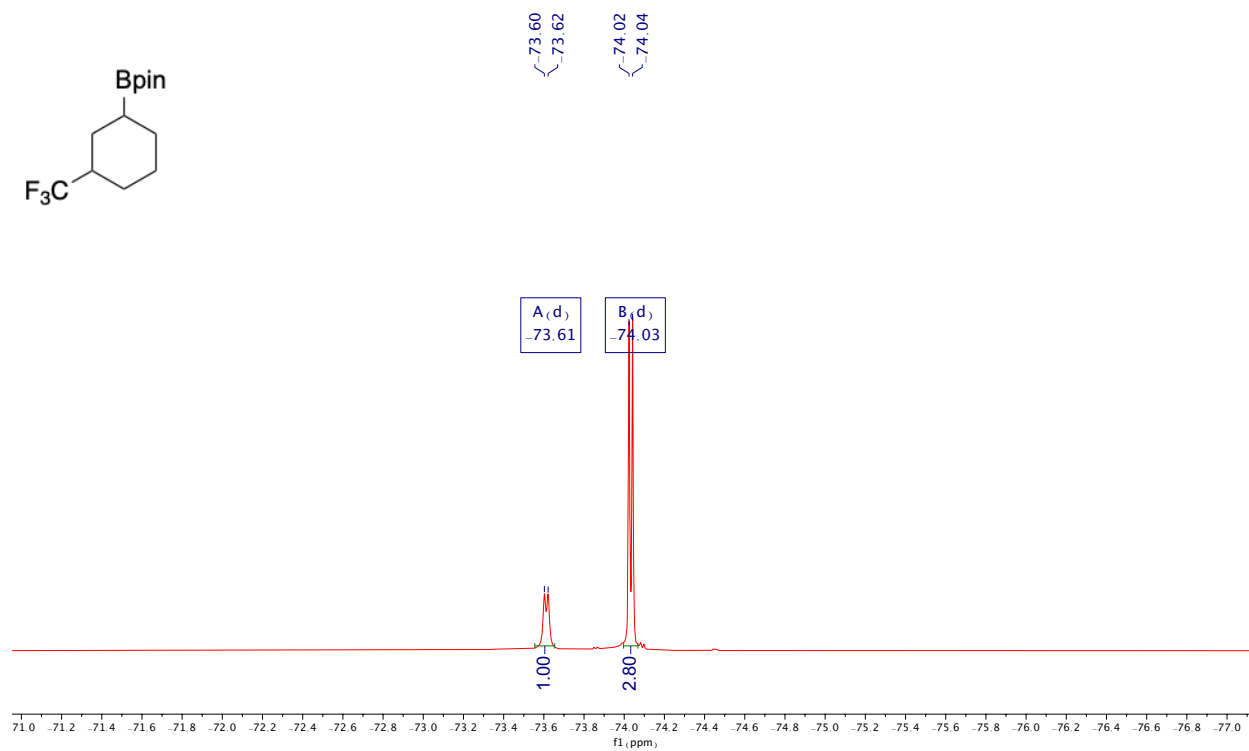

**<sup>1</sup>H NMR (500MHz, CDCl<sub>3</sub>) of ethyl-3-(4,4,5,5-tetramethyl-1,3,2-dioxaborolan-2-yl)cyclohexane-1-carboxylate (2s)**

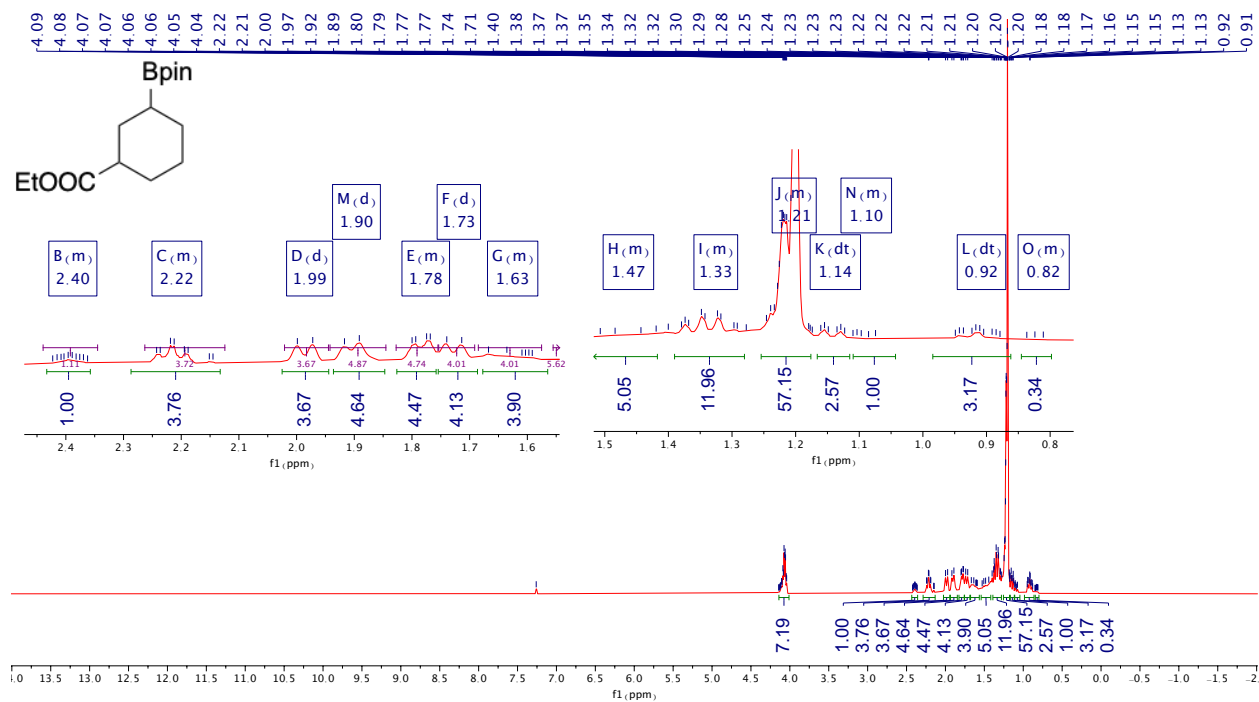

**<sup>13</sup>C{<sup>1</sup>H} (126 MHz, CDCl<sub>3</sub>) NMR of ethyl-3-(4,4,5,5-tetramethyl-1,3,2-dioxaborolan-2-yl)cyclohexane-1-carboxylate (2s)**

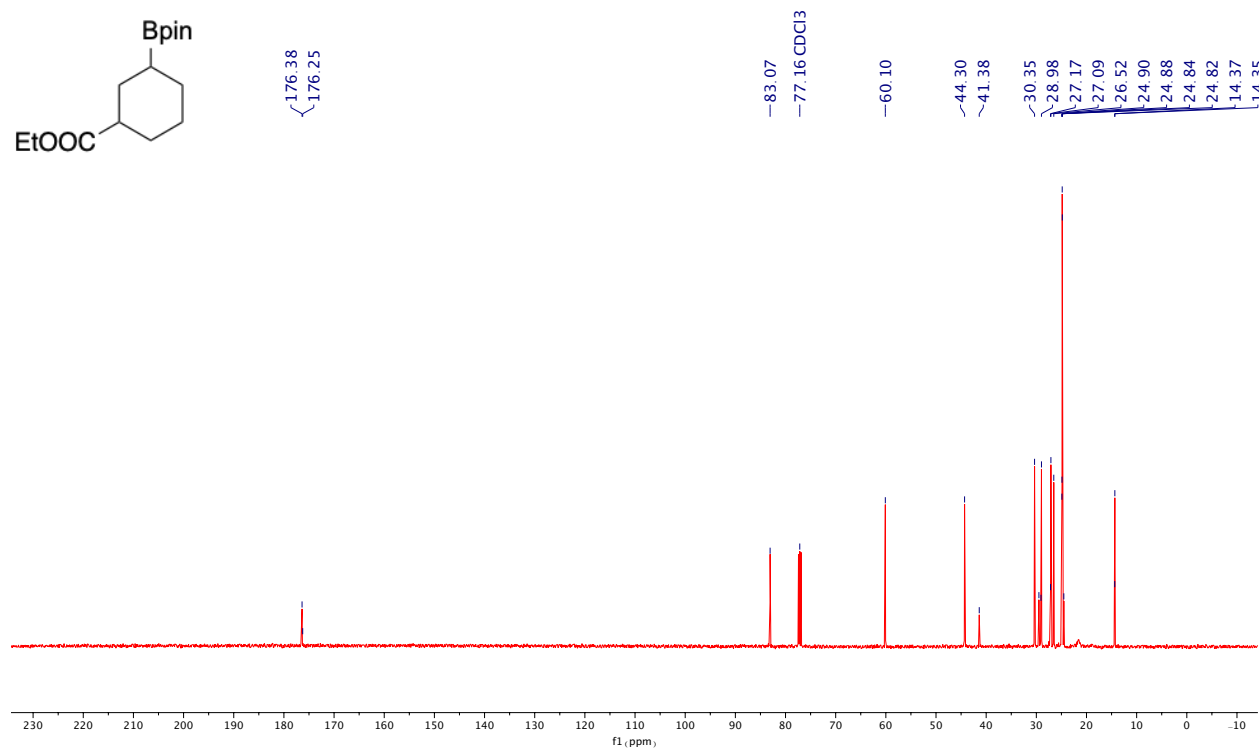

$^{11}\text{B}$  NMR (160MHz,  $\text{CDCl}_3$ ) of ethyl-3-(4,4,5,5-tetramethyl-1,3,2-dioxaborolan-2-yl)cyclohexane-1-carboxylate (2s)

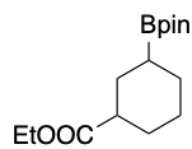

-33.2

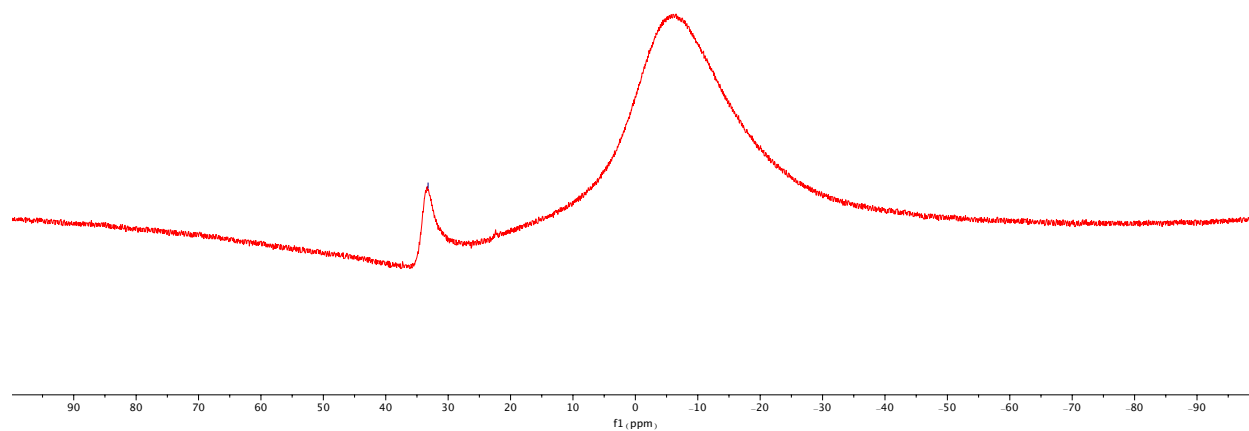

HSQC of ethyl-3-(4,4,5,5-tetramethyl-1,3,2-dioxaborolan-2-yl)cyclohexane-1-carboxylate (2s)

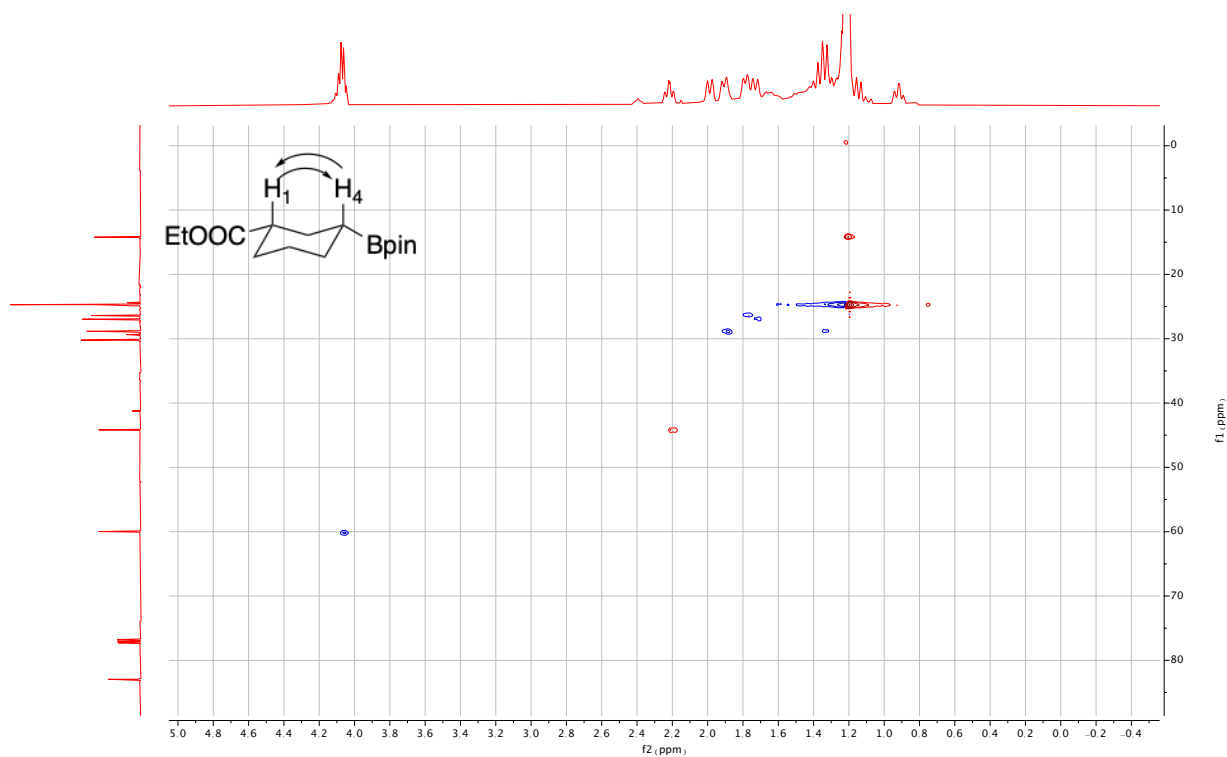

NOE of ethyl-3-(4,4,5,5-tetramethyl-1,3,2-dioxaborolan-2-yl)cyclohexane-1-carboxylate (2s)

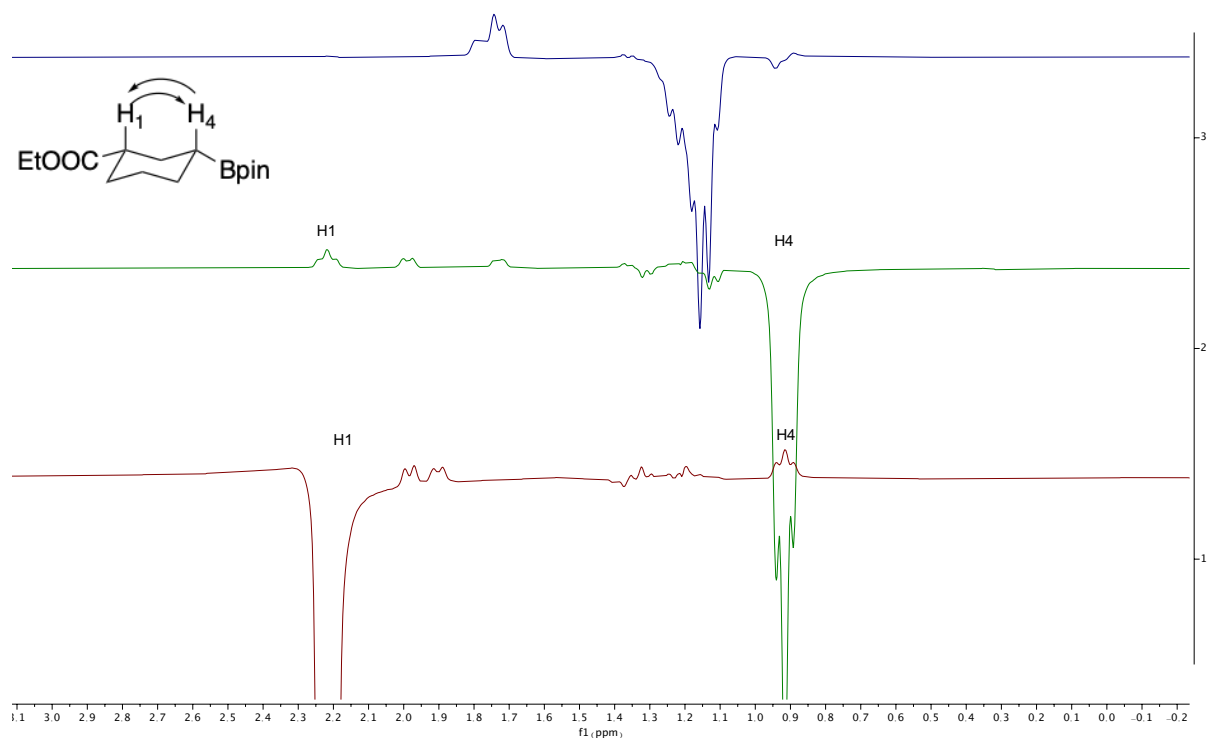

<sup>1</sup>H NMR (500MHz, CDCl<sub>3</sub>) of 4,4,5,5-tetramethyl-2-(3-methylcyclohexyl)-1,3,2-dioxaborolane (2t)

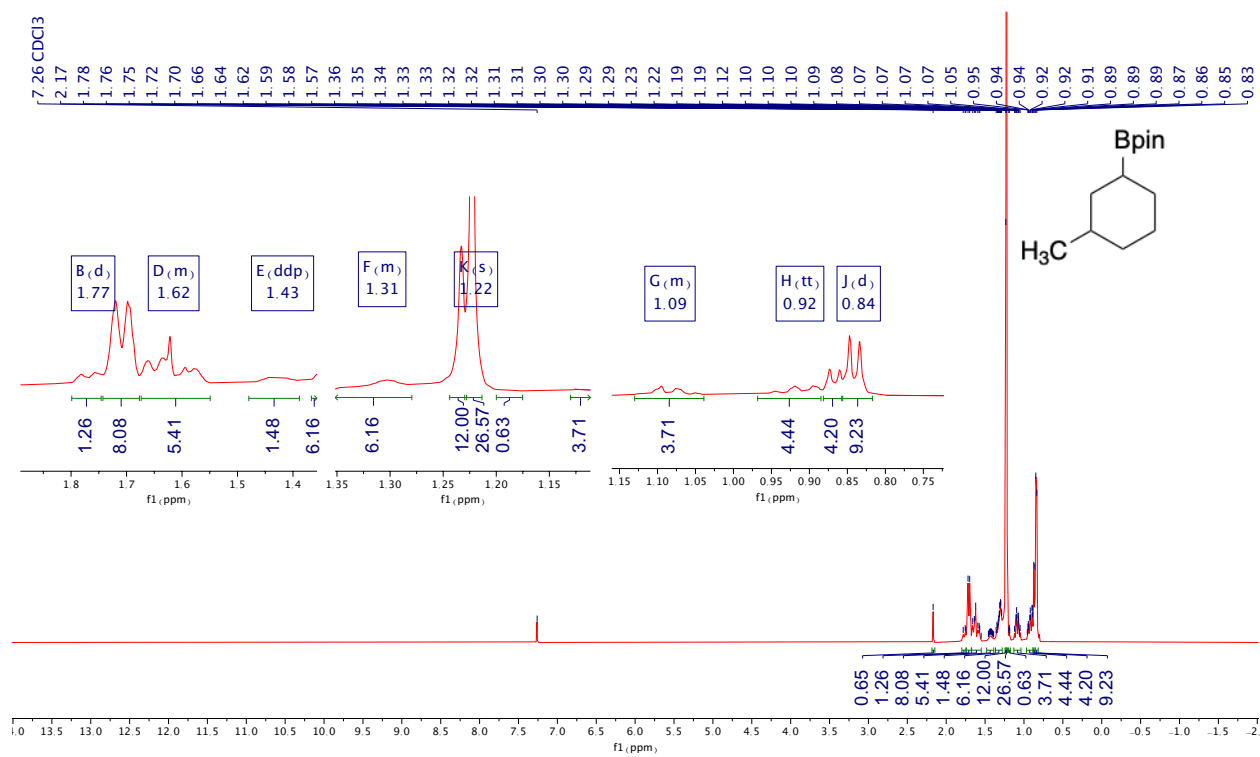

$^{13}\text{C}\{^1\text{H}\}$  (126 MHz,  $\text{CDCl}_3$ ) NMR of 4,4,5,5-tetramethyl-2-(3-methylcyclohexyl)-1,3,2-dioxaborolane (2t)

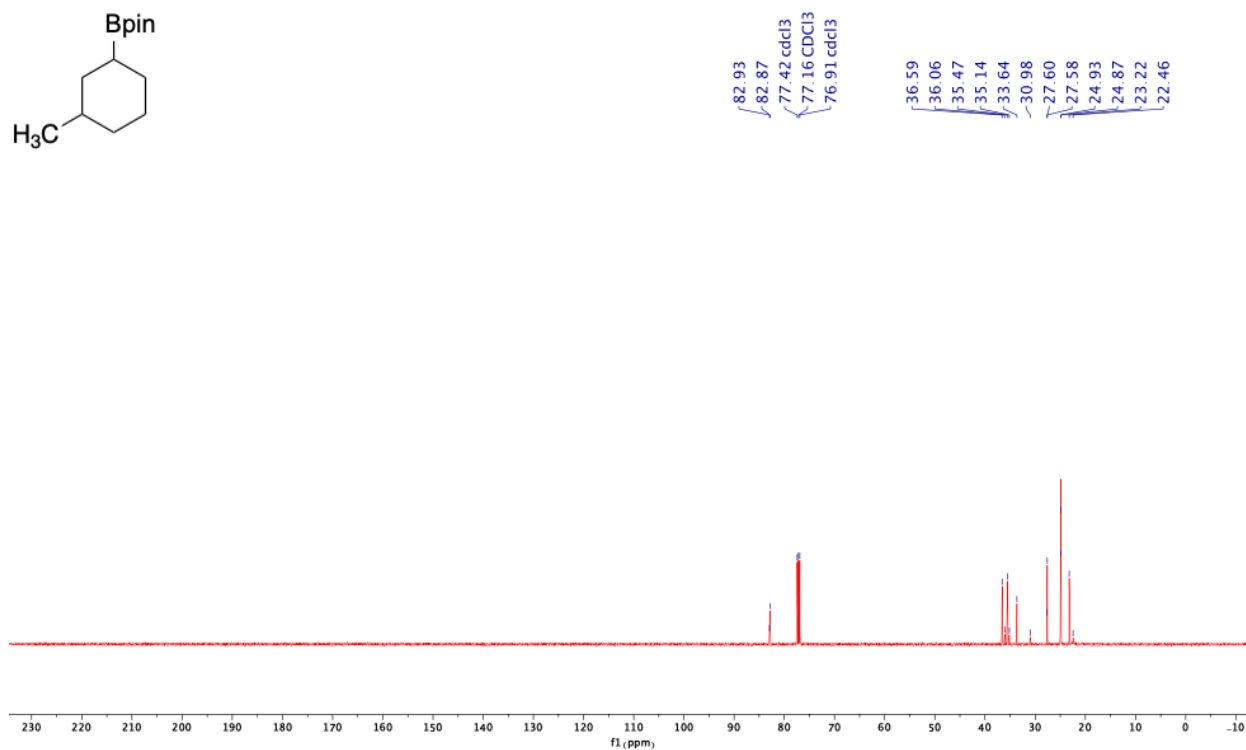

$^{11}\text{B}$  NMR (160MHz,  $\text{CDCl}_3$ ) of 4,4,5,5-tetramethyl-2-(3-methylcyclohexyl)-1,3,2-dioxaborolane (2t)

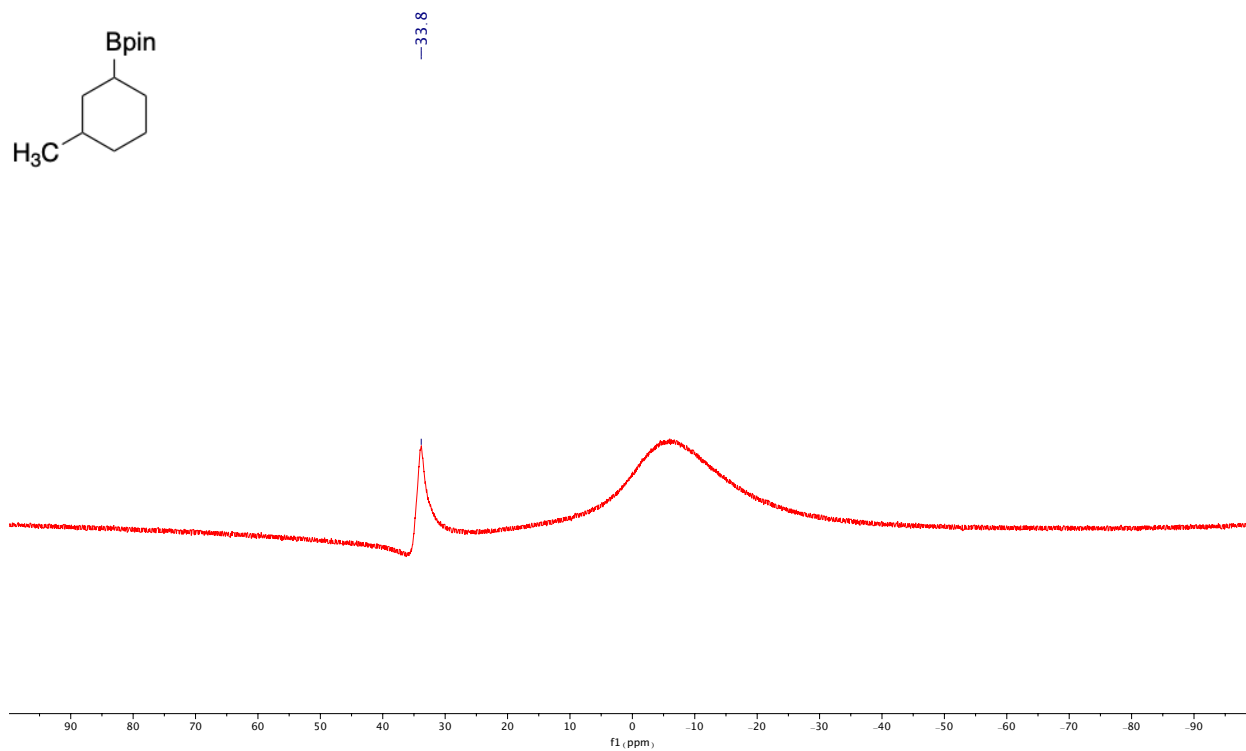

<sup>1</sup>H NMR (500MHz, CDCl<sub>3</sub>) of 2-(-3-methoxycyclohexyl)-4,4,5,5-tetramethyl-1,3,2-dioxaborolane (2u)

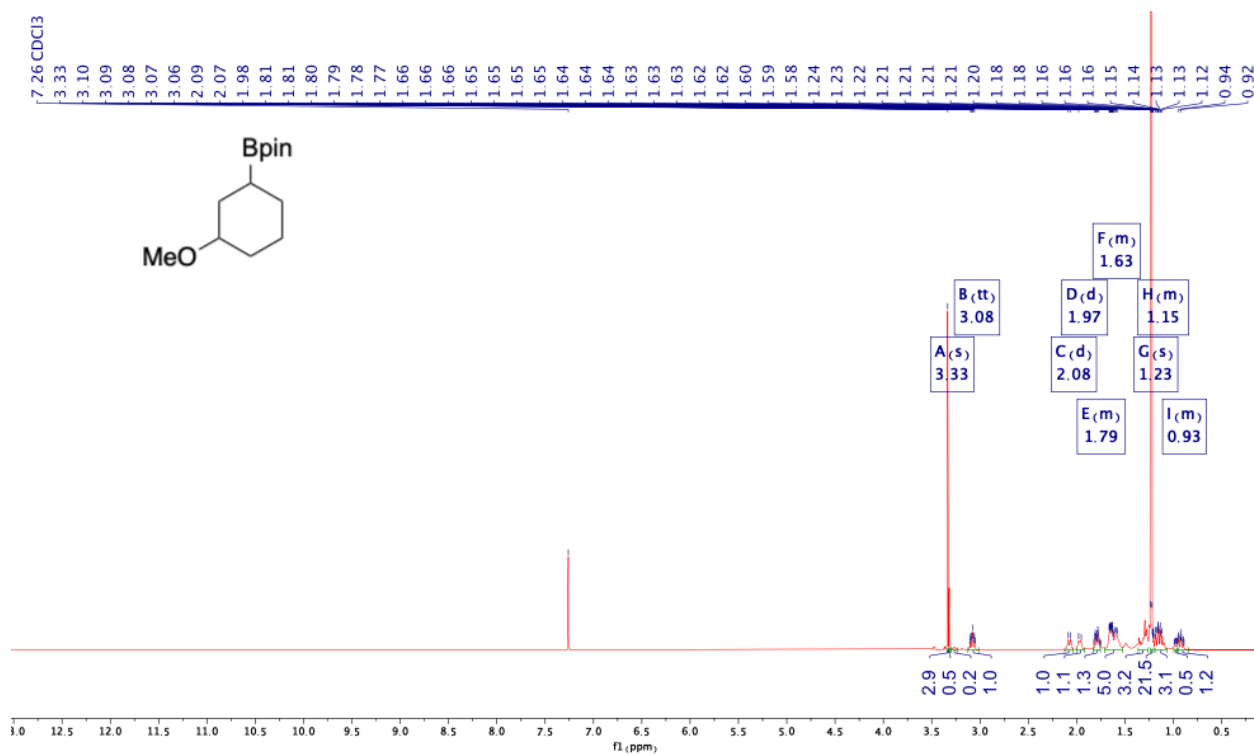

<sup>13</sup>C{<sup>1</sup>H} (126 MHz, CDCl<sub>3</sub>) NMR of 2-(-3-methoxycyclohexyl)-4,4,5,5-tetramethyl-1,3,2-dioxaborolane (2u)

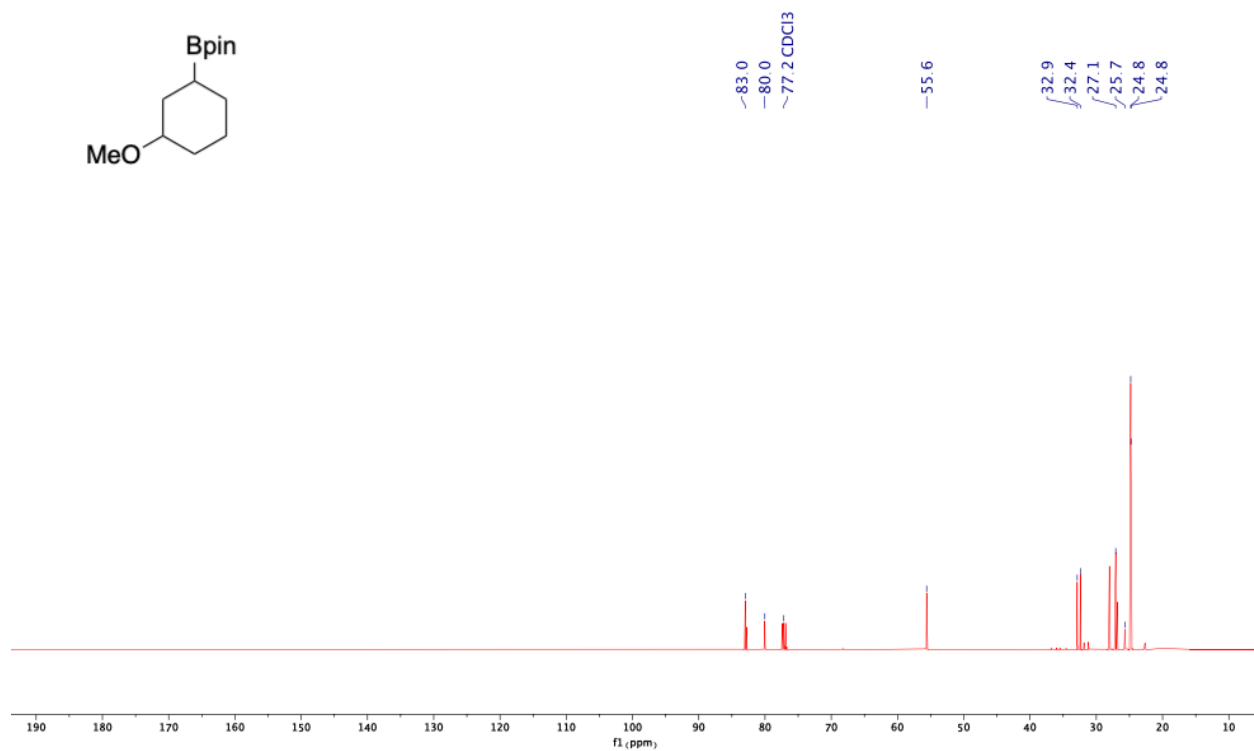

**$^{11}\text{B}$  NMR (160MHz,  $\text{CDCl}_3$ ) of 2-(3-methoxycyclohexyl)-4,4,5,5-tetramethyl-1,3,2-dioxaborolane (2u)**

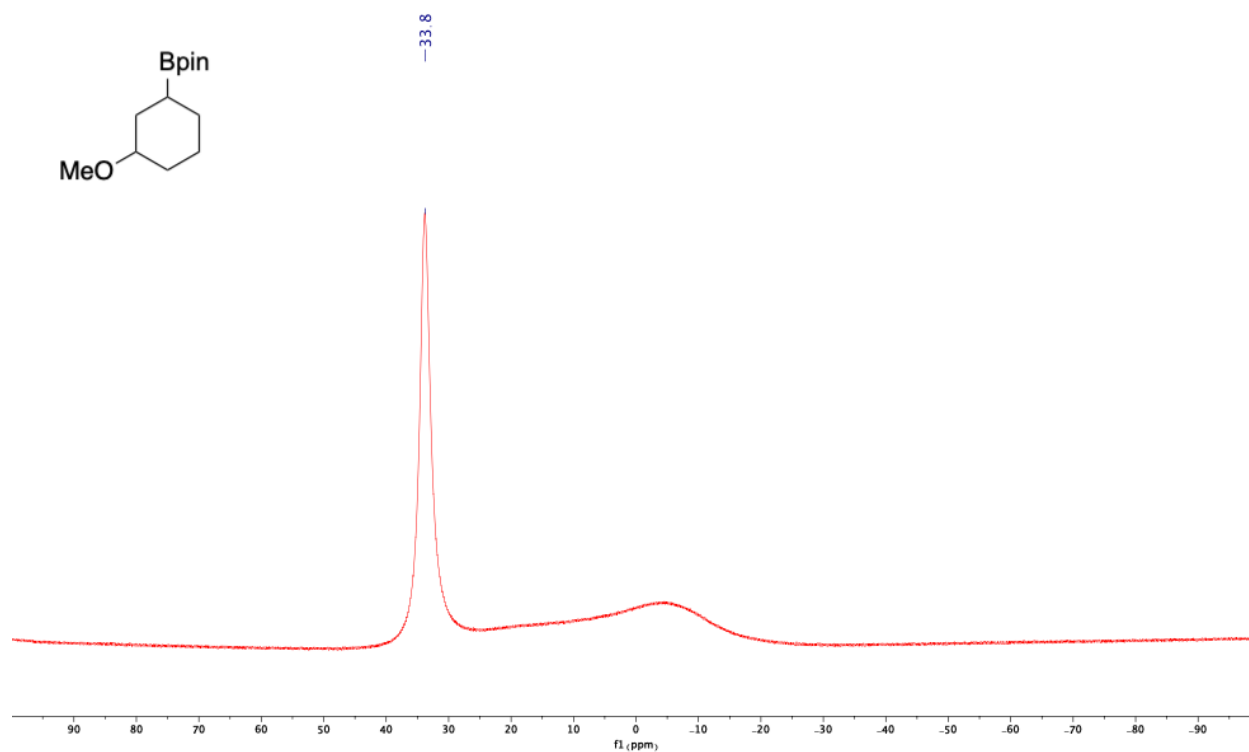

**$^1\text{H}$  NMR (500MHz,  $\text{CDCl}_3$ ) of cis-1,2-bis(4,4,5,5-tetramethyl-1,3,2-dioxaborolan-2-yl)cyclohexane (2v)**

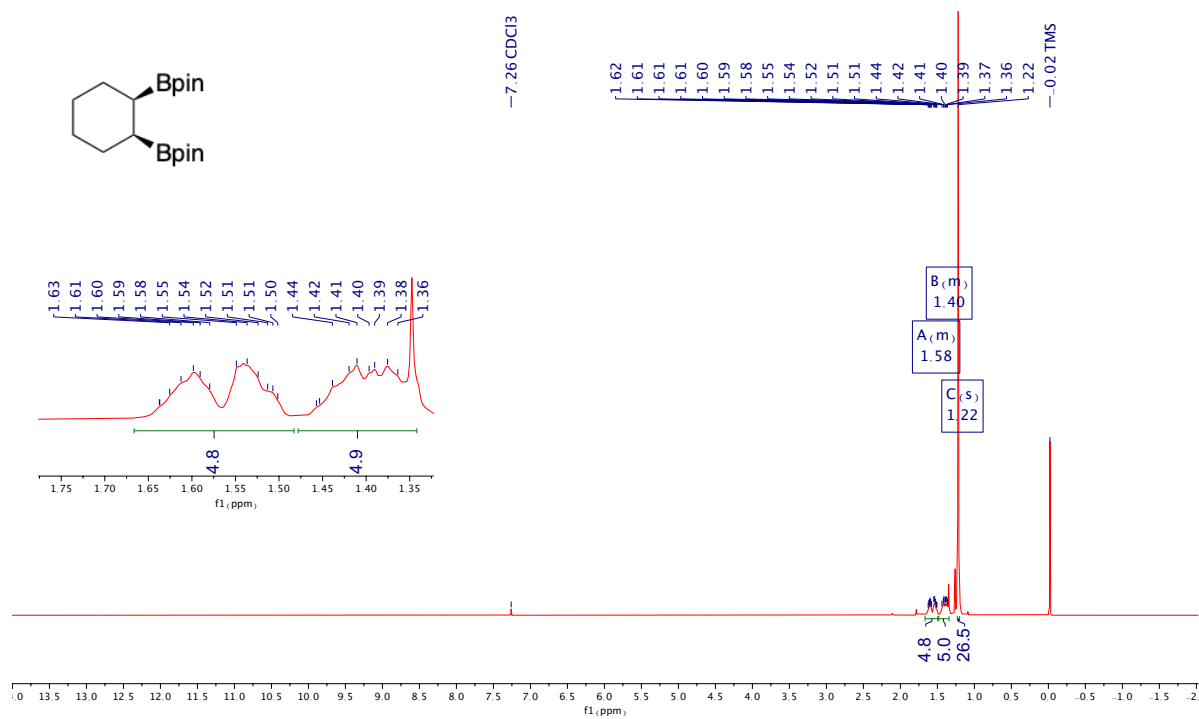

$^{13}\text{C}\{^1\text{H}\}$  (126 MHz,  $\text{CDCl}_3$ ) of cis-1,2-bis(4,4,5,5-tetraethyl-1,3,2-dioxaborolan-2-yl)cyclohexane (2v)

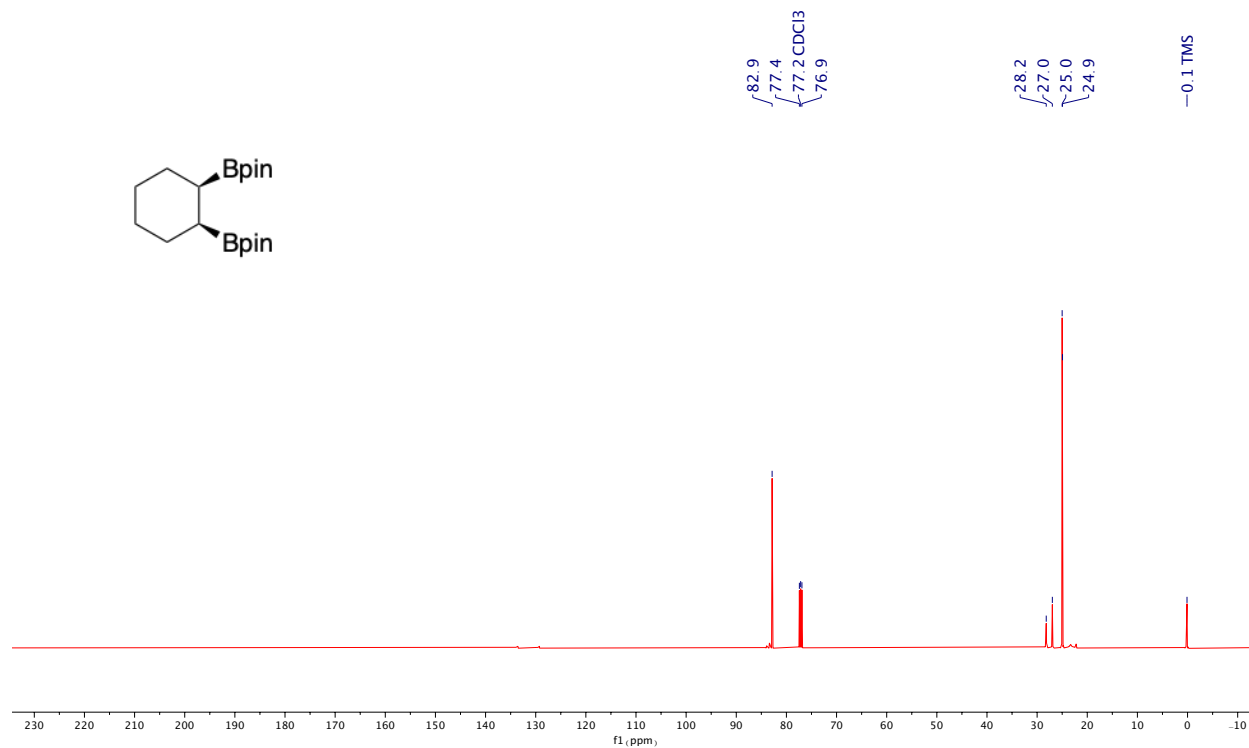

$^{11}\text{B}$  NMR (160 MHz,  $\text{CDCl}_3$ ) of cis-1,2-bis(4,4,5,5-tetraethyl-1,3,2-dioxaborolan-2-yl)cyclohexane (2v)

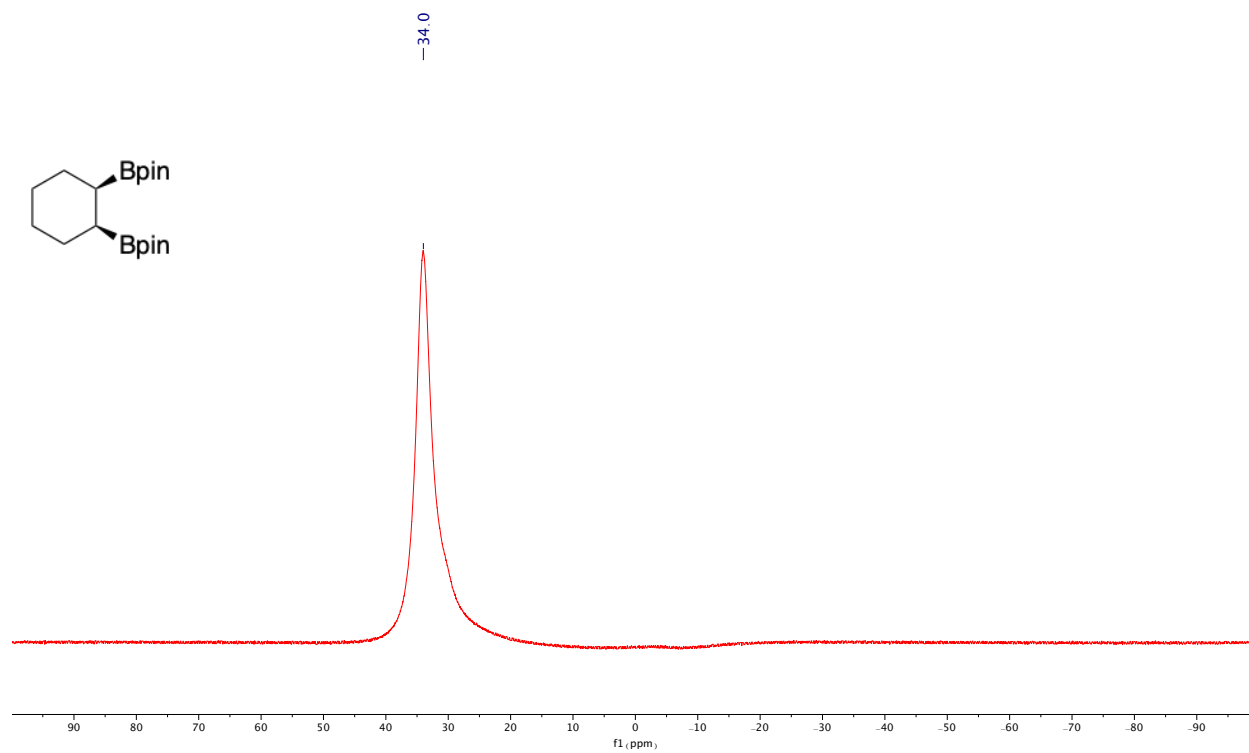

**<sup>1</sup>H NMR (500MHz, D<sub>2</sub>O) of 2-(trimethylsilyl)piperidin-1-ium (+)-camphorsulfonate (2w)**

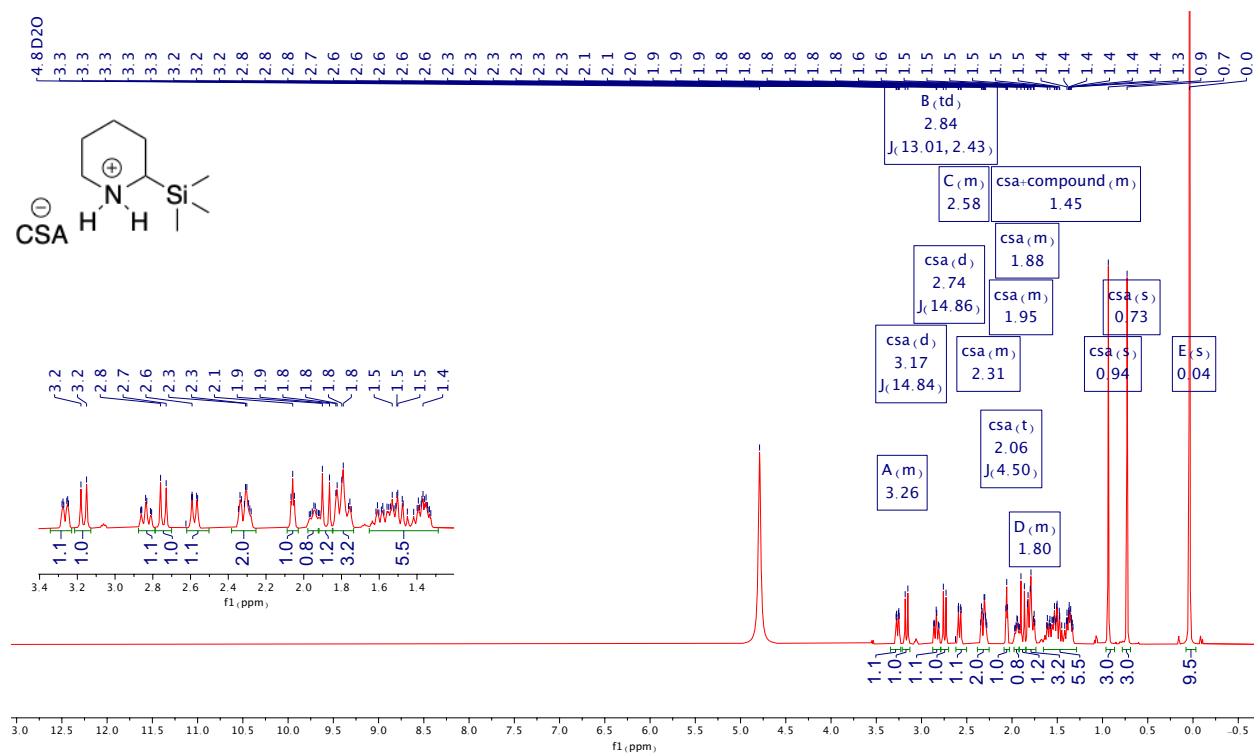

**<sup>13</sup>C{<sup>1</sup>H} (126 MHz, D<sub>2</sub>O) NMR of 2-(trimethylsilyl)piperidin-1-ium (+)-camphorsulfonate (2w)**

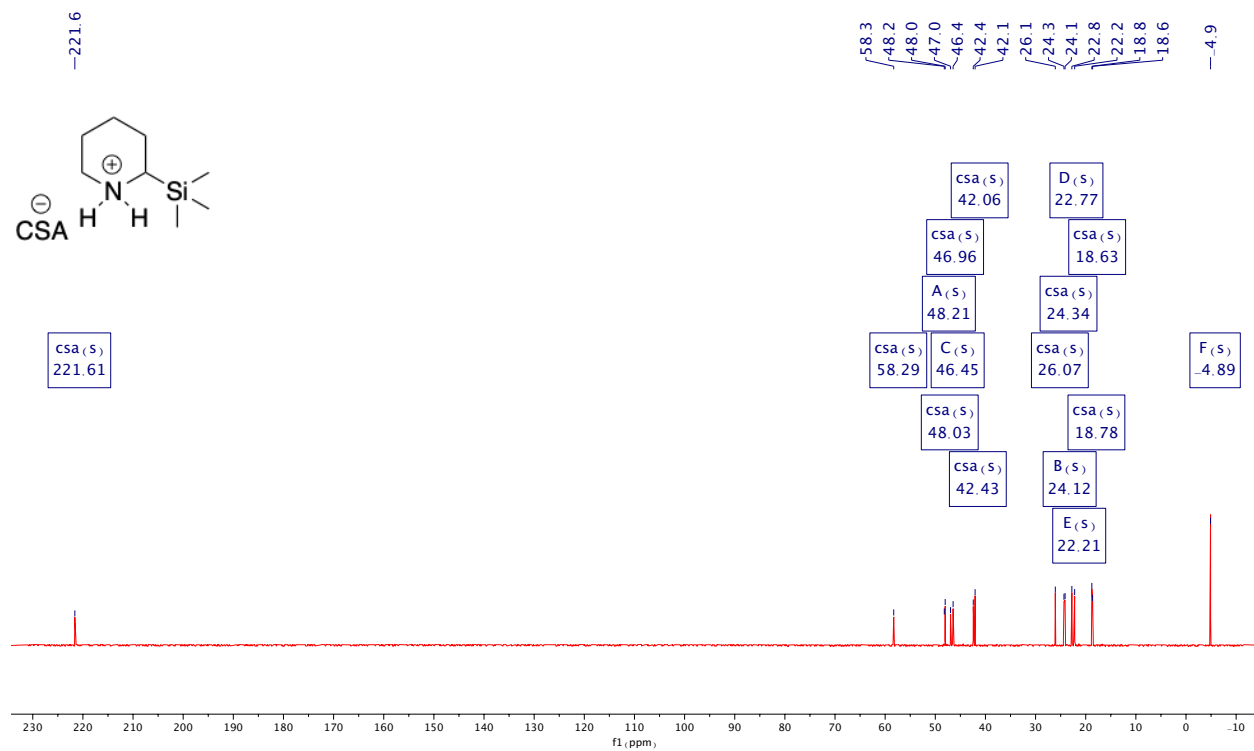

**$^{29}\text{Si}$  NMR (99MHz,  $\text{D}_2\text{O}$ ) of 2-(trimethylsilyl)piperidin-1-ium (+)-camphorsulfonate (2w)**

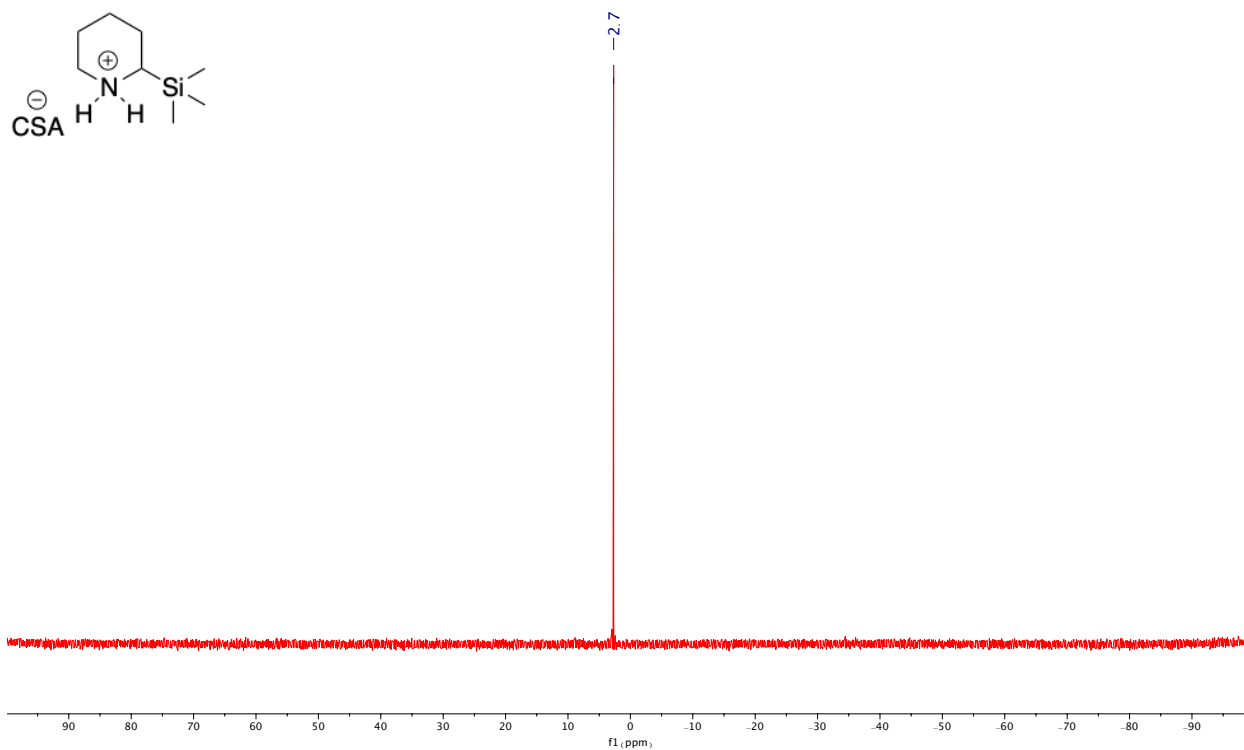

**$^1\text{H}$  NMR (500MHz,  $\text{D}_2\text{O}$ ) of 2-(Trifluoromethyl)-4-(trimethylsilyl)piperidine (2x)**

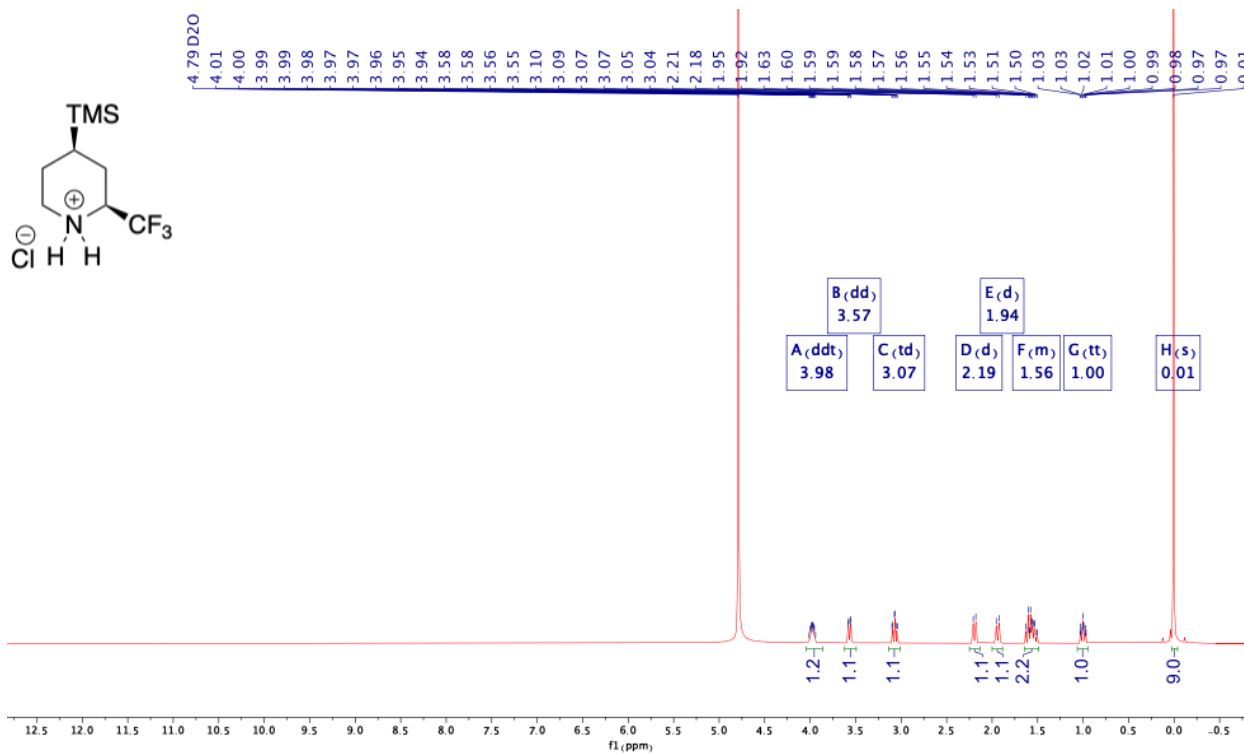

$^{13}\text{C}\{^1\text{H}\}$  (126 MHz,  $\text{D}_2\text{O}$ ) NMR of 2-(Trifluoromethyl)-4-(trimethylsilyl)piperidine (2x)

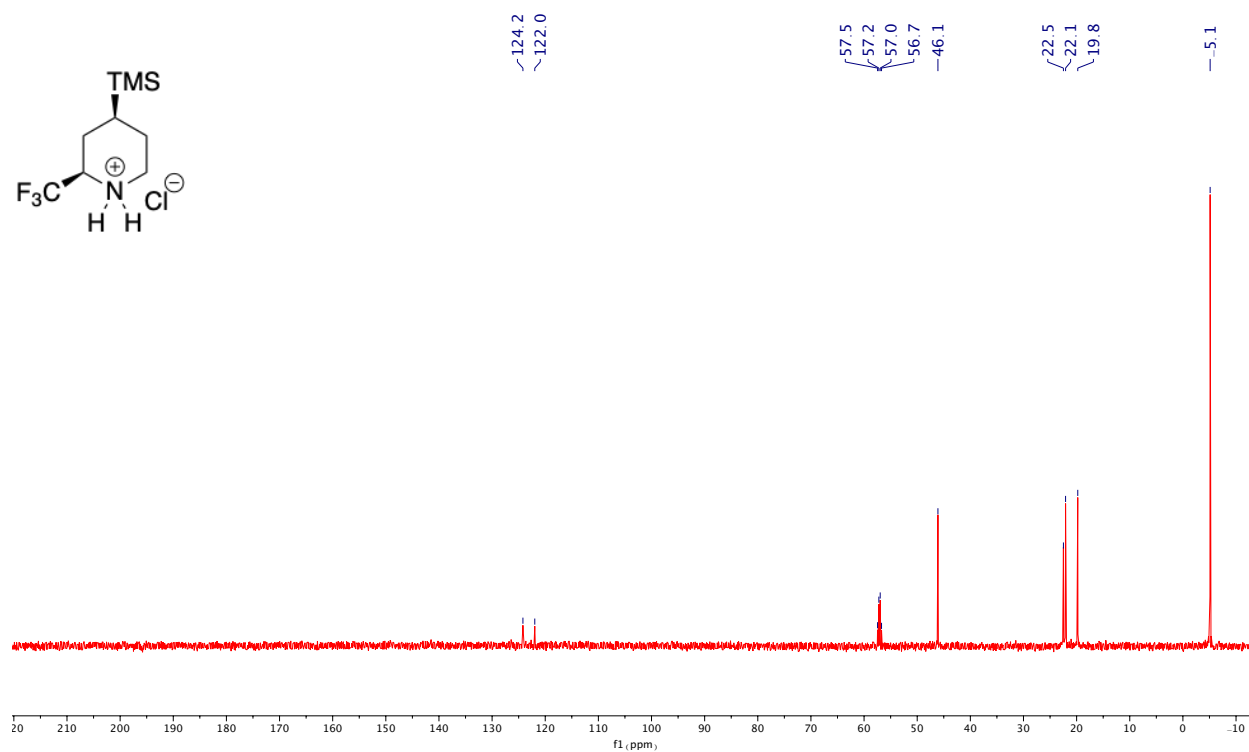

$^{29}\text{Si}$  NMR (99MHz,  $\text{D}_2\text{O}$ ) of 2-(Trifluoromethyl)-4-(trimethylsilyl)piperidine (2x)

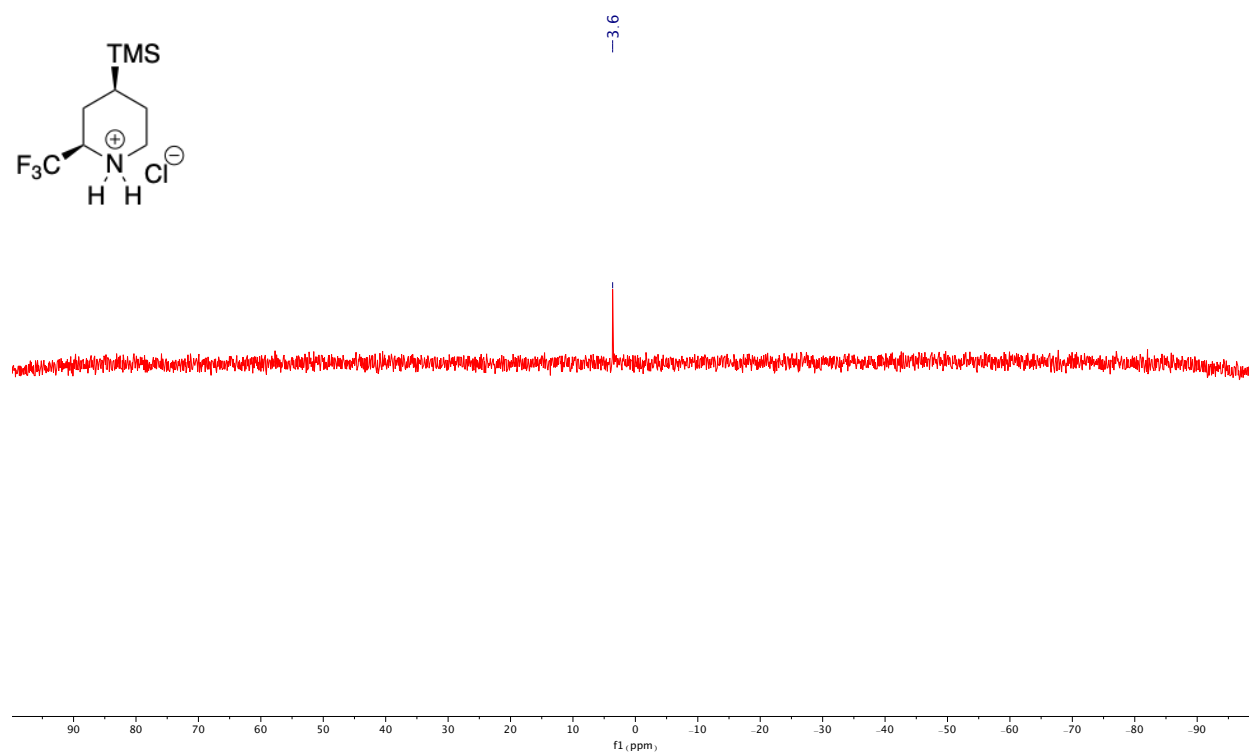

**$^{19}\text{F}$  NMR (470 MHz,  $\text{D}_2\text{O}$ ) of 2-(Trifluoromethyl)-4-(trimethylsilyl)piperidine (2x)**

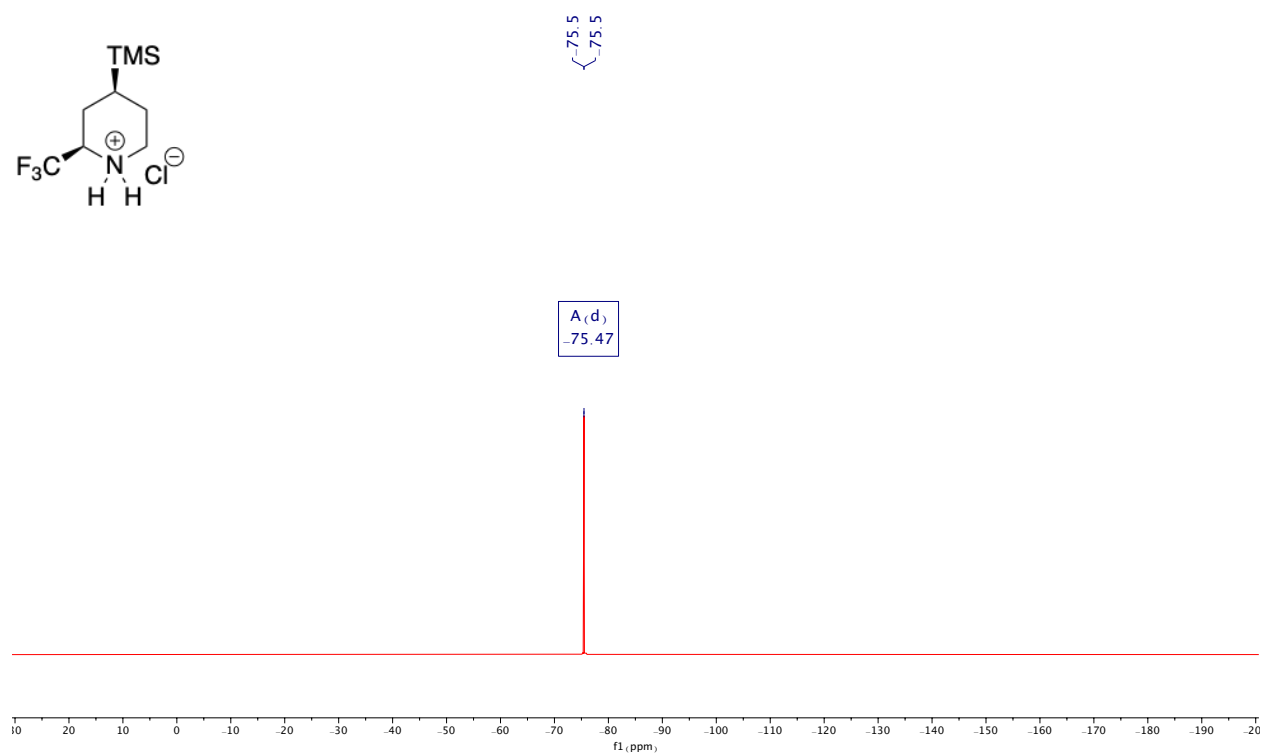

**NOE of 2-(Trifluoromethyl)-4-(trimethylsilyl)piperidine (2x)**

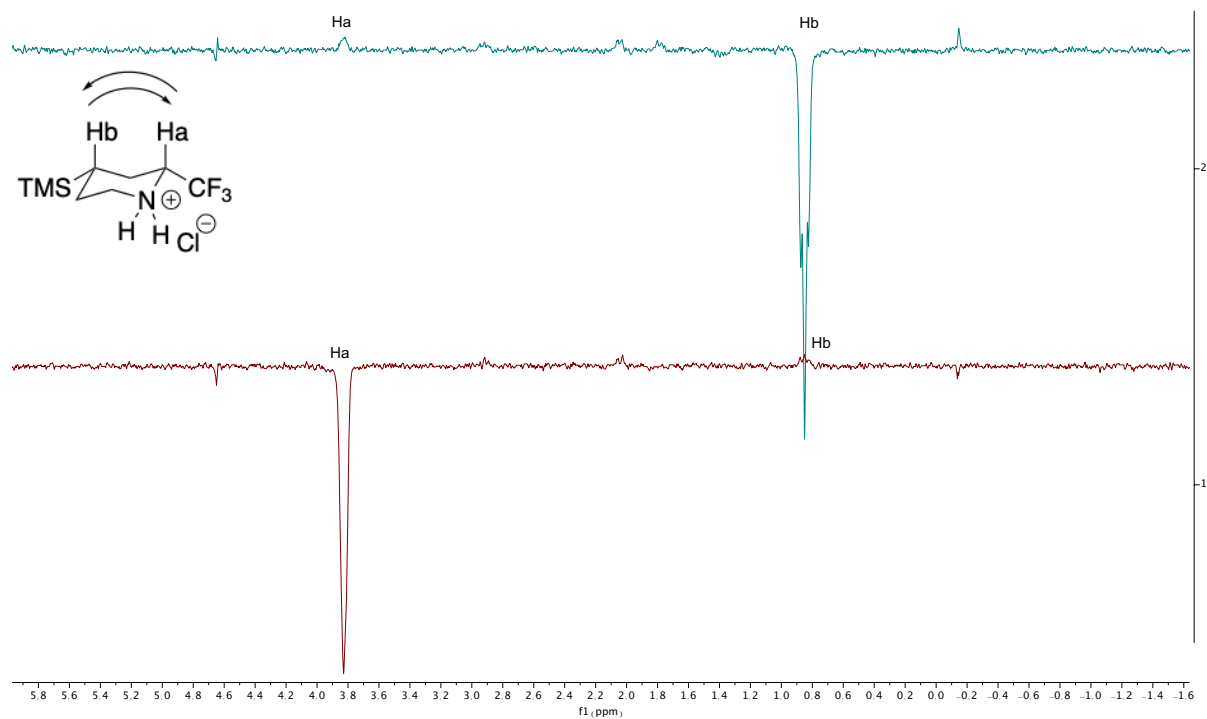

<sup>1</sup>H NMR (500MHz, D<sub>2</sub>O) of 2-(Trifluoromethyl)-5-(trimethylsilyl)piperidine (2y)

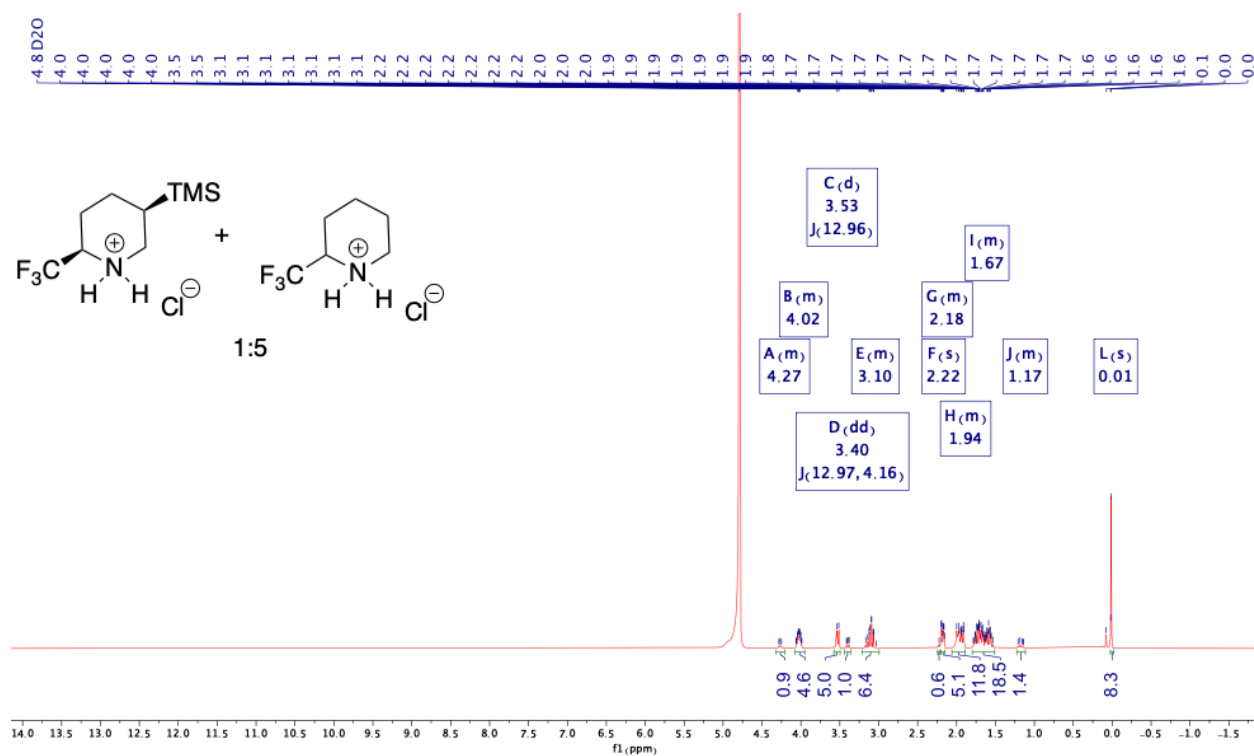

<sup>13</sup>C{<sup>1</sup>H} (126 MHz, D<sub>2</sub>O) NMR of 2-(Trifluoromethyl)-5-(trimethylsilyl)piperidine (2y)

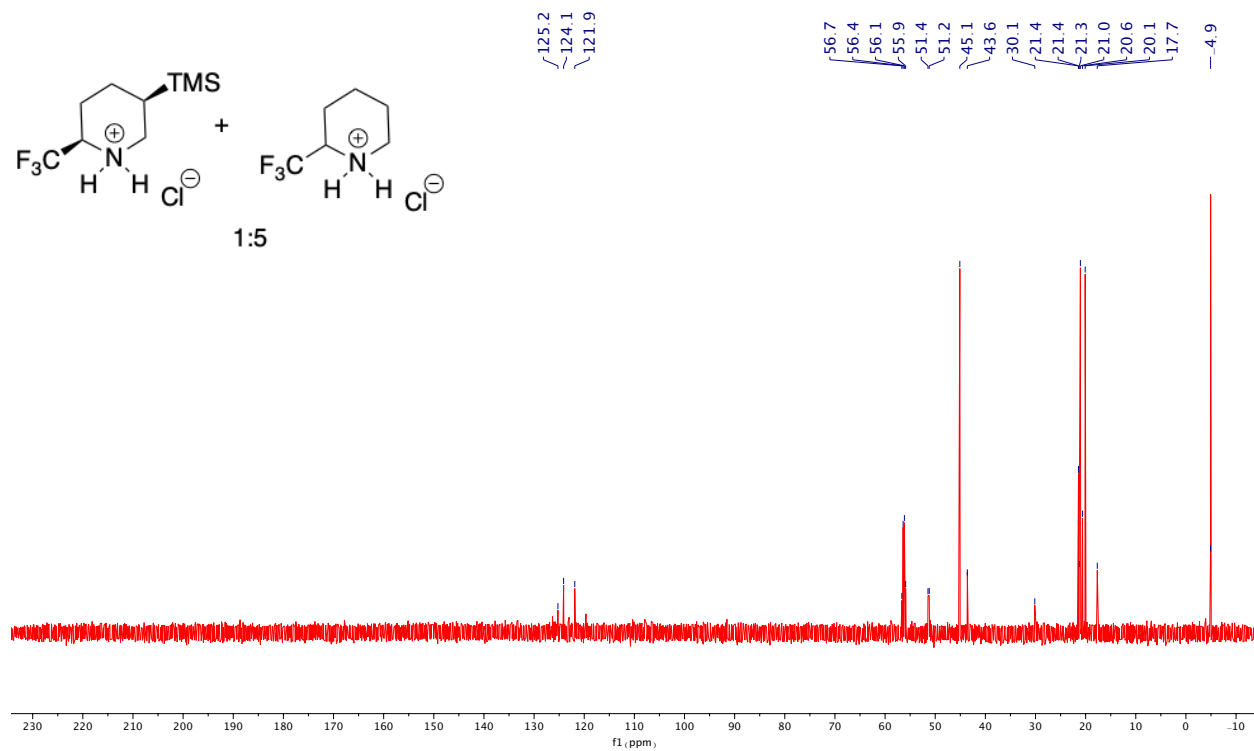

**$^{19}\text{F}$  NMR (470 MHz,  $\text{D}_2\text{O}$ ) of 2-(Trifluoromethyl)-5-(trimethylsilyl)piperidine (2y)**

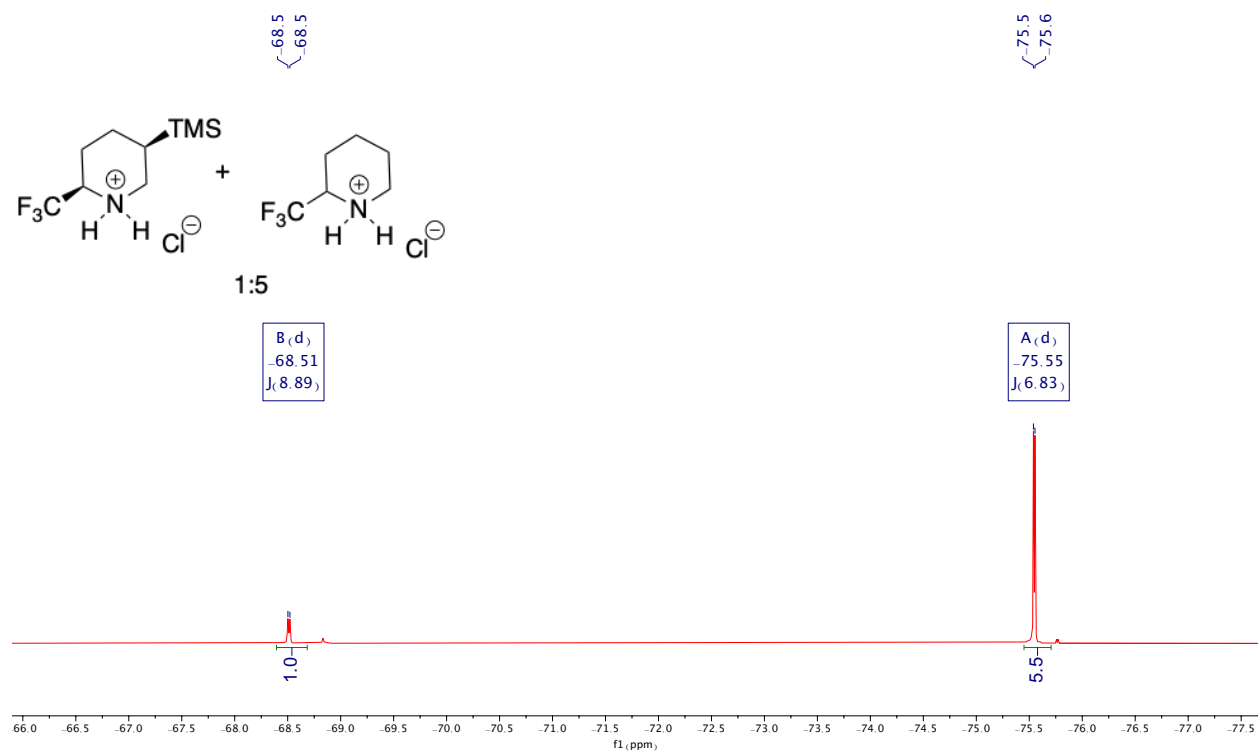

**$^1\text{H}$  NMR (500MHz,  $\text{C}_6\text{D}_6$ ) of 3-(2,3-dihydrobenzofuran-2-yl)-1,1,3,5,5,5-heptomethyltrisiloxane (2z)**

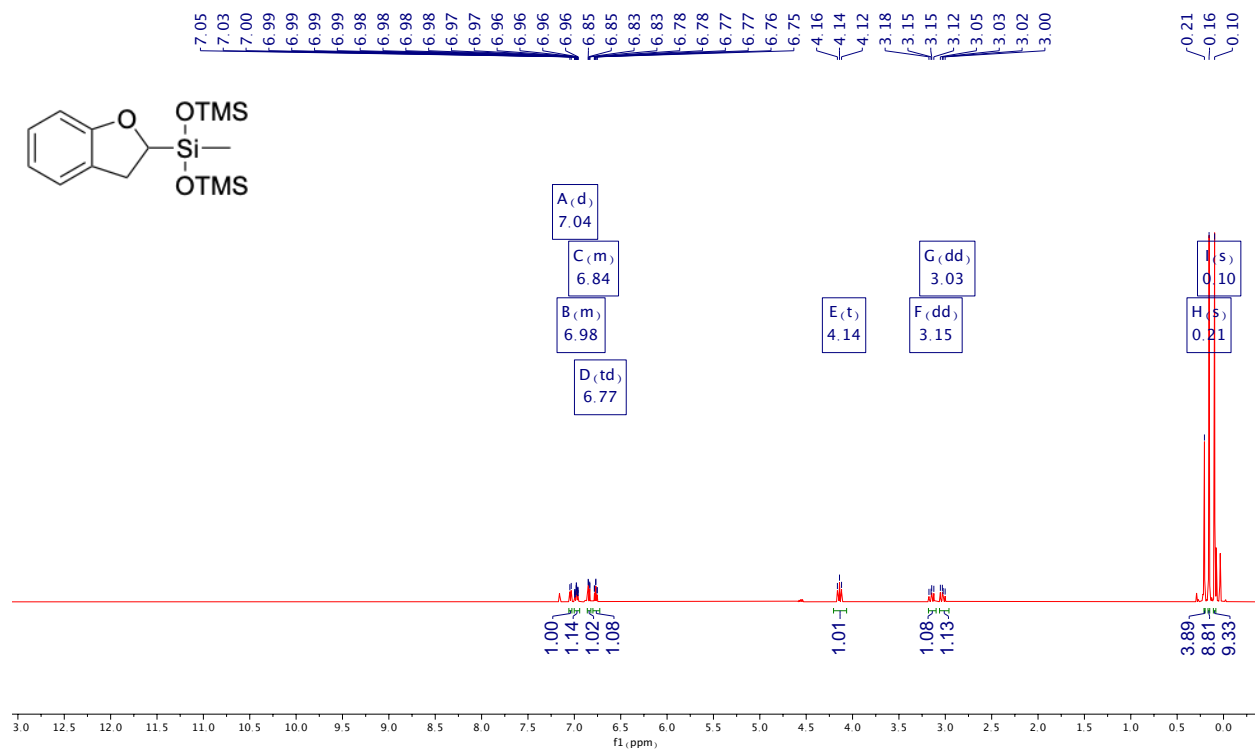

Chemical structure: C[Si](C)(C)OC1Cc2ccccc2O1

<sup>13</sup>C NMR peaks (ppm):

- 161.2
- 127.8 c6d6
- 127.5 c6d6
- 124.7
- 120.0
- 109.6
- 75.0
- 31.1
- 1.5
- 1.4
- 2.9

Cc1ccc2c(c1)oc(C[Si](C)(C)OC)cc2

Chemical structure of 2-(trimethylsilyl)-2H-chromene (TMS-chromene) is shown above the spectrum.

The spectrum displays two main signals:

- A multiplet at approximately 9.1 ppm, labeled with an integration value of 9.19 and a peak count of 9.3.
- A sharp singlet at approximately -31.6 ppm, labeled with an integration value of 31.6.

The x-axis is labeled f1 (ppm) and ranges from 90 to -90.

**<sup>1</sup>H NMR (500MHz, CDCl<sub>3</sub>) of Cyclohexyltriethoxysilane (2aa)**

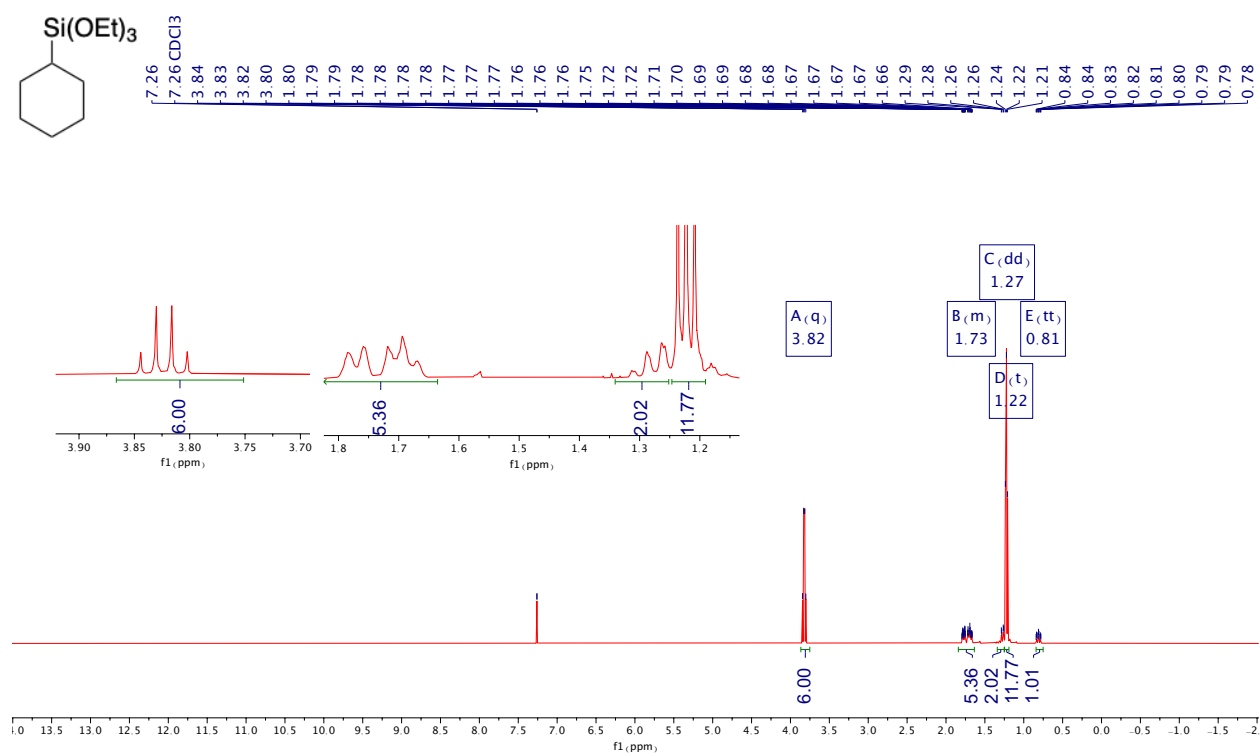

**<sup>13</sup>C{<sup>1</sup>H} (126 MHz, CDCl<sub>3</sub>) NMR of Cyclohexyltriethoxysilane (2aa)**

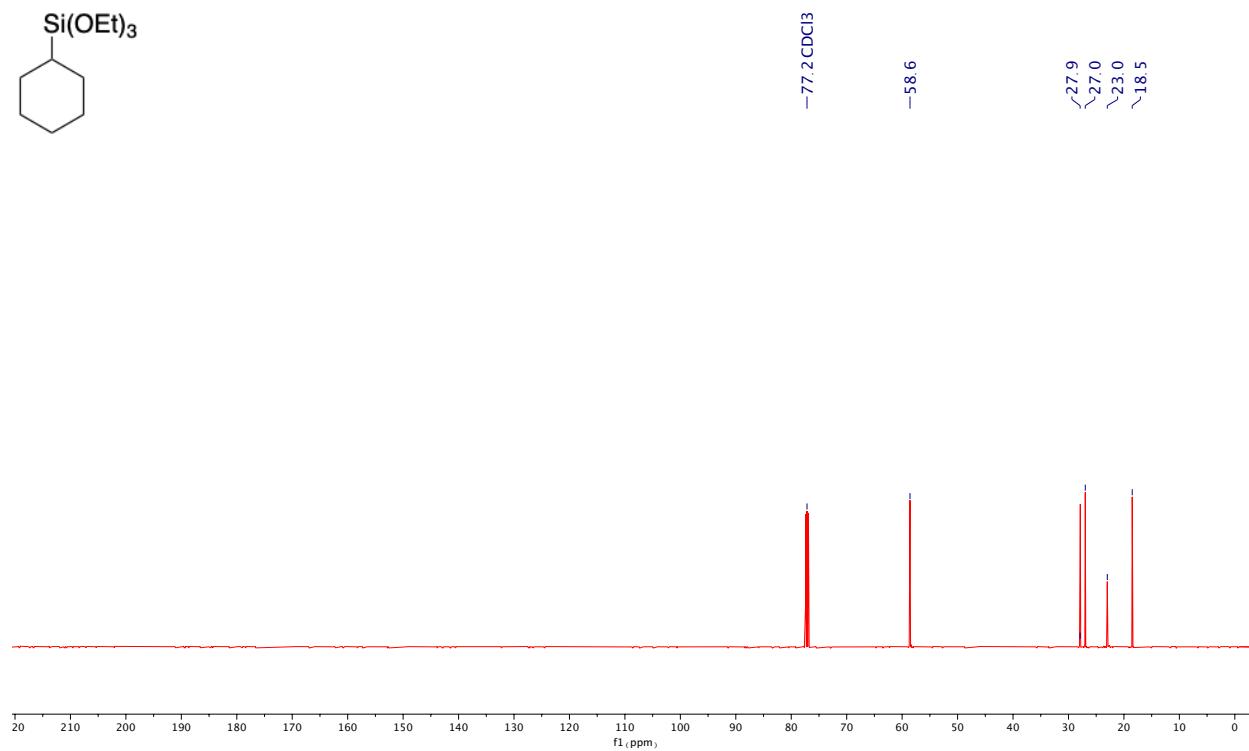

**$^{29}\text{Si}$  NMR (99MHz,  $\text{CDCl}_3$ ) of Cyclohexyltriethoxysilane (2aa)**

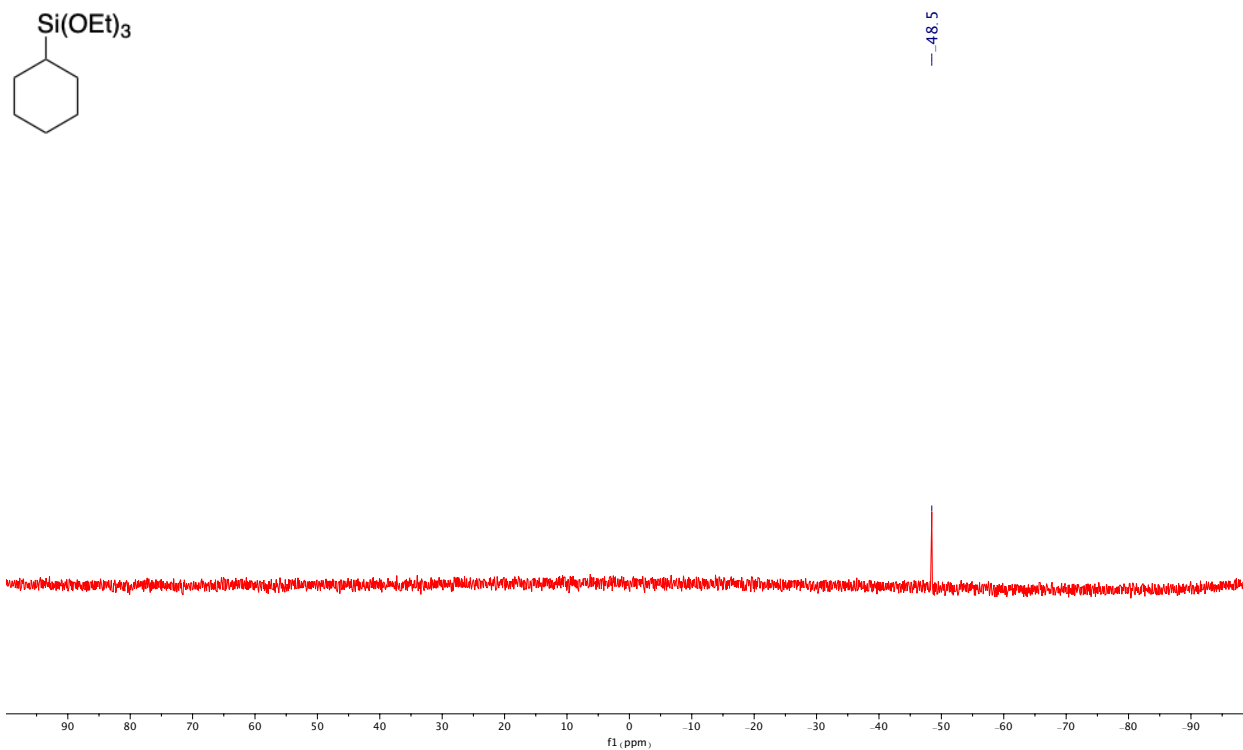

**$^1\text{H}$  NMR (500MHz,  $\text{C}_6\text{D}_6$ ) of *t*-butyl-4-(4,4,5,5-tetramethyl-1,3,2-dioxaborolan-2-yl)-2-(trimethylsilyl)pyrrolidine-1-carboxylate (2ab)**

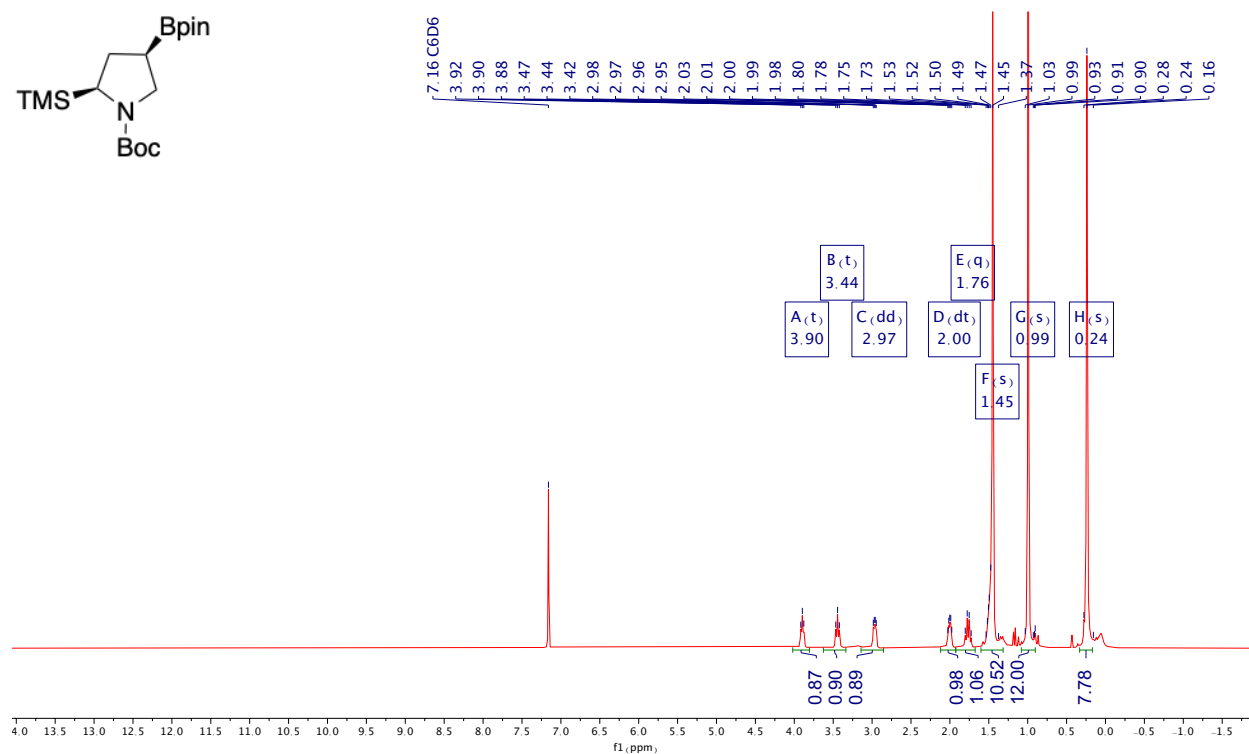

$^{13}\text{C}\{^1\text{H}\}$  (126 MHz,  $\text{C}_6\text{D}_6$ ) of *t*-butyl-4-(4,4,5,5-tetramethyl-1,3,2-dioxaborolan-2-yl)-2(trimethylsilyl)pyrrolidine-1-carboxylate (2ab)

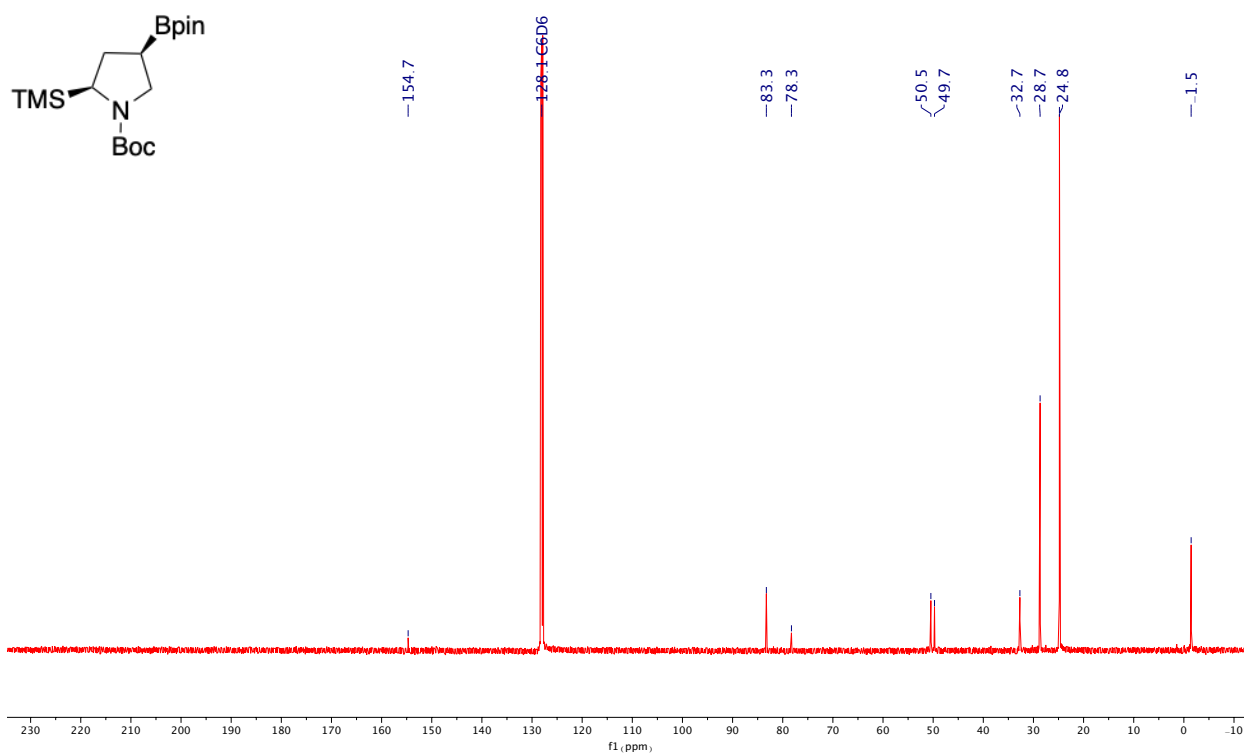

$^{11}\text{B}$  NMR (160 MHz,  $\text{C}_6\text{D}_6$ ) of *t*-butyl-4-(4,4,5,5-tetramethyl-1,3,2-dioxaborolan-2-yl)-2(trimethylsilyl)pyrrolidine-1-carboxylate (2ab)

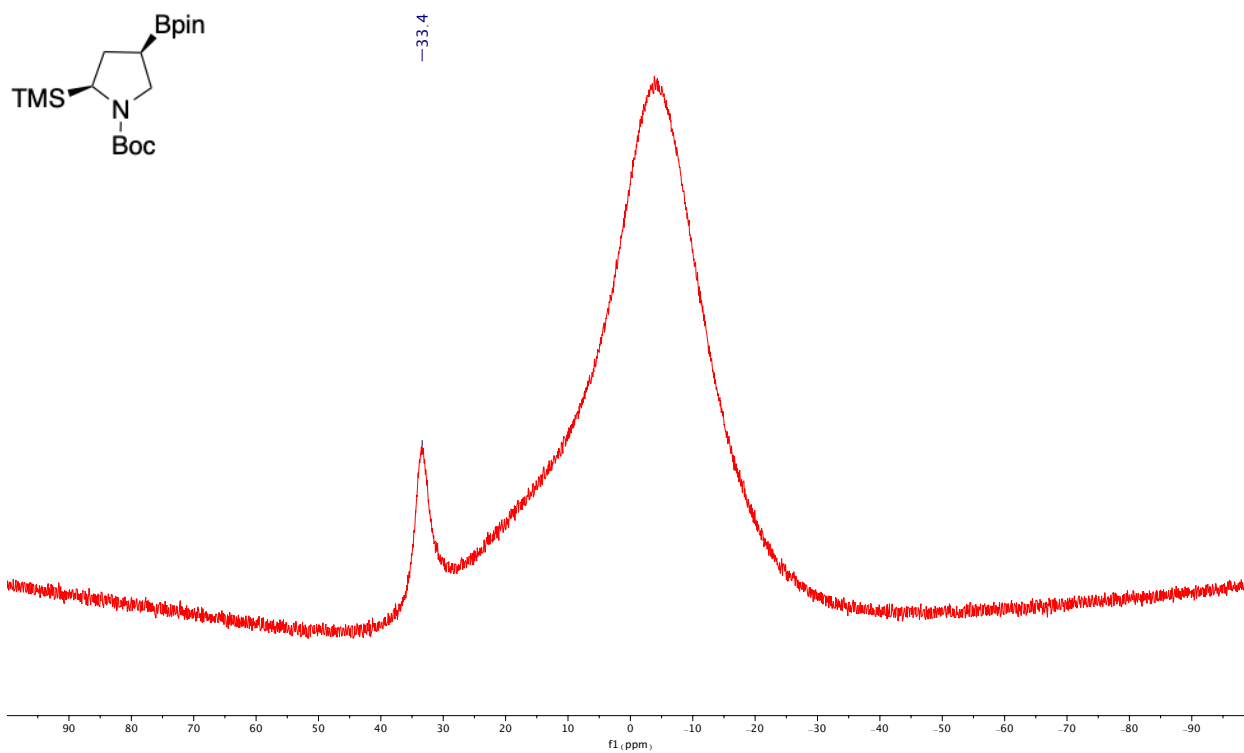

$^{29}\text{Si}$  NMR (99 MHz,  $\text{C}_6\text{D}_6$ ) *t*-butyl-4-(4,4,5,5-tetramethyl-1,3,2-dioxaborolan-2-yl)-2-trimethylsilylpyrrolidine-1-carboxylate (2ab)

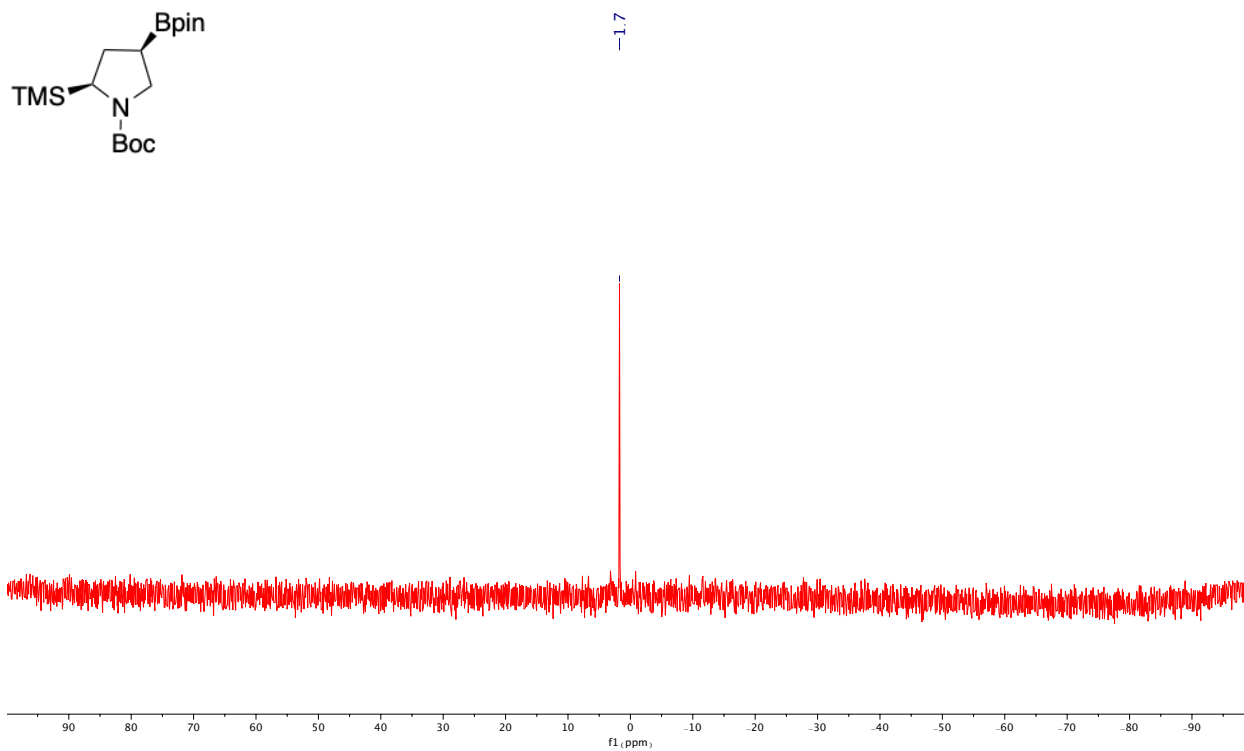

2D-NOE of *t*-butyl-4-(4,4,5,5-tetramethyl-1,3,2-dioxaborolan-2-yl)-2(trimethylsilyl)pyrrolidine-1-carboxylate (2ab)

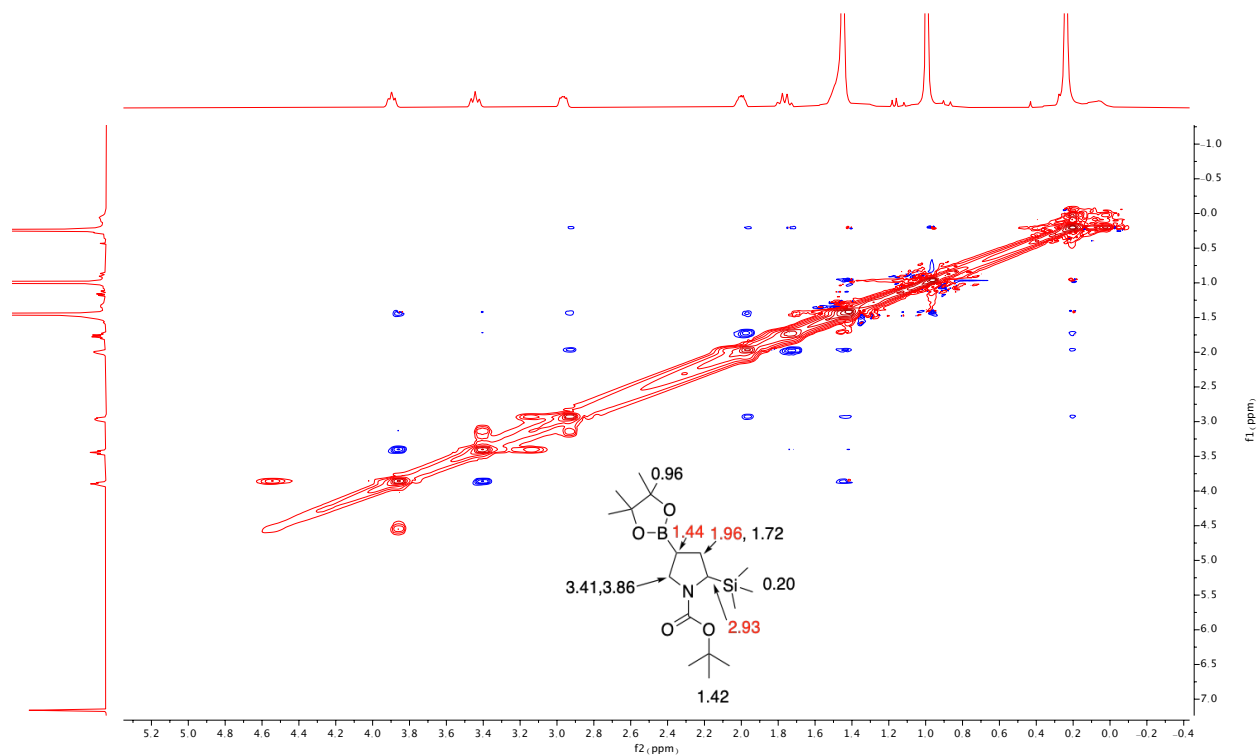

COSY of *t*-butyl-4-(4,4,5,5-tetramethyl-1,3,2-dioxaborolan-2-yl)-2(trimethylsilyl)pyrrolidine-1-carboxylate (2ab)

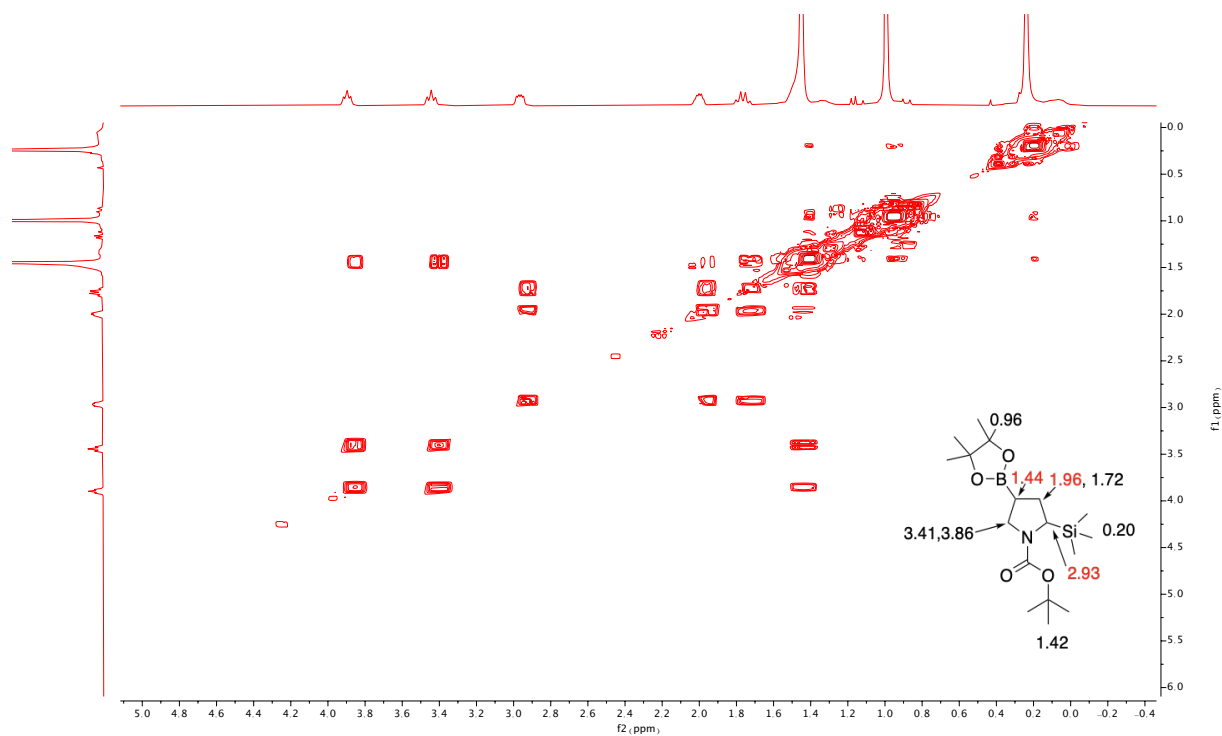

**$^1\text{H}$  NMR (500MHz,  $\text{CDCl}_3$ ) of Trimethyl(3-(4,4,5,5-tetramethyl-1,3,2-dioxaborolan-2-yl)cyclohexyl)silane (2ae)**

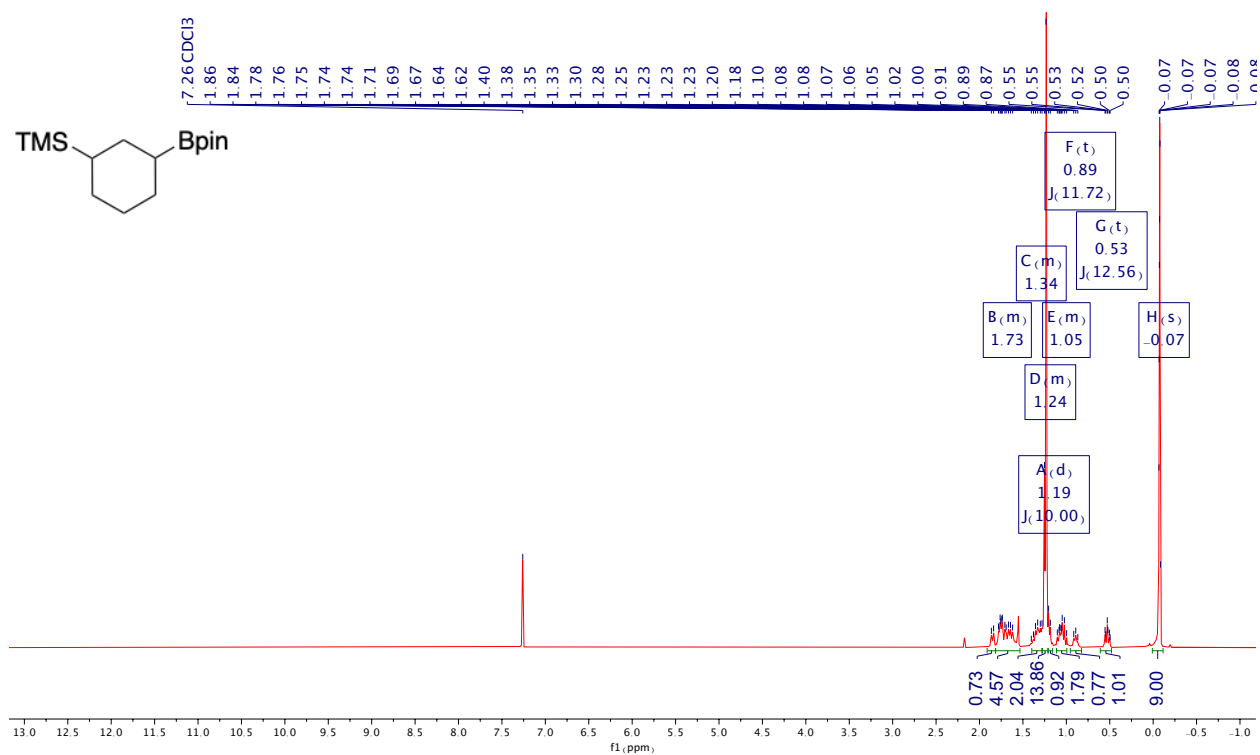

**$^{13}\text{C}\{^1\text{H}\}$  (126 MHz,  $\text{CDCl}_3$ ) NMR of Trimethyl(3-(4,4,5,5-tetramethyl-1,3,2-dioxaborolan-2-yl)cyclohexyl)silane (2ae)**

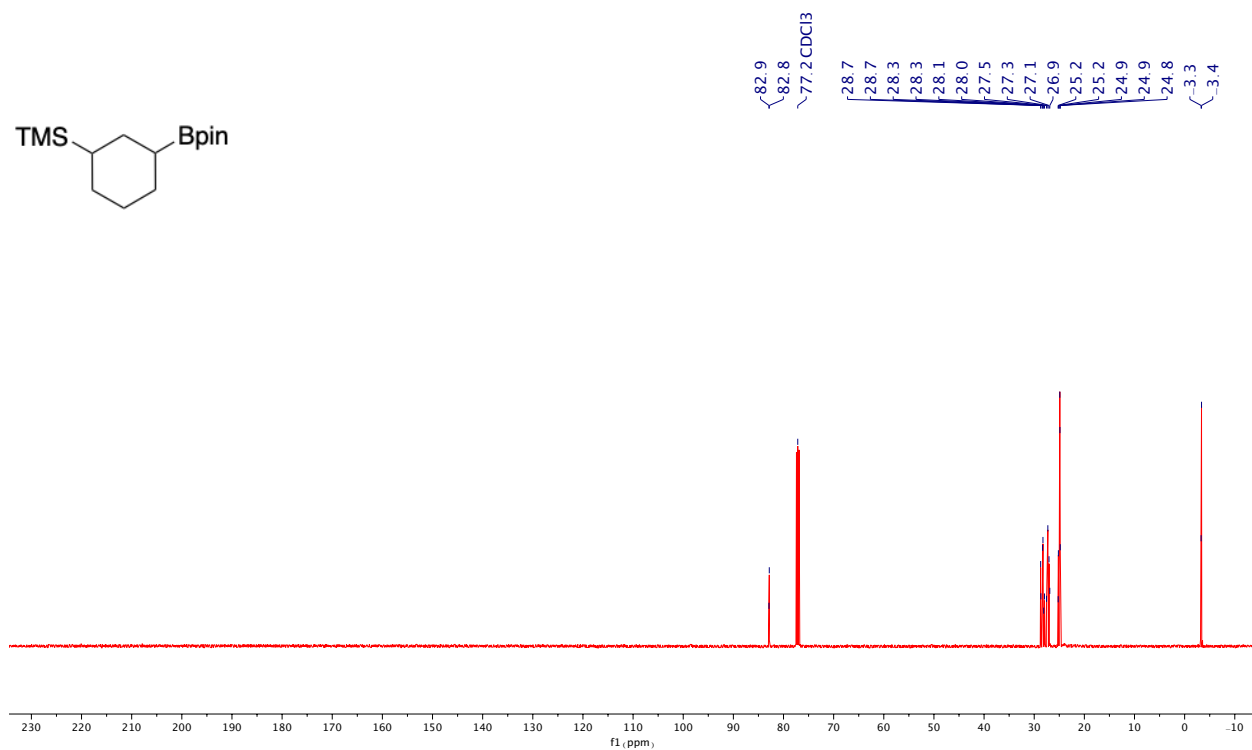

<sup>29</sup>Si NMR (99MHz, CDCl<sub>3</sub>) of Trimethyl(3-(4,4,5,5-tetramethyl-1,3,2-dioxaborolan-2-yl)cyclohexyl)silane (2ae)

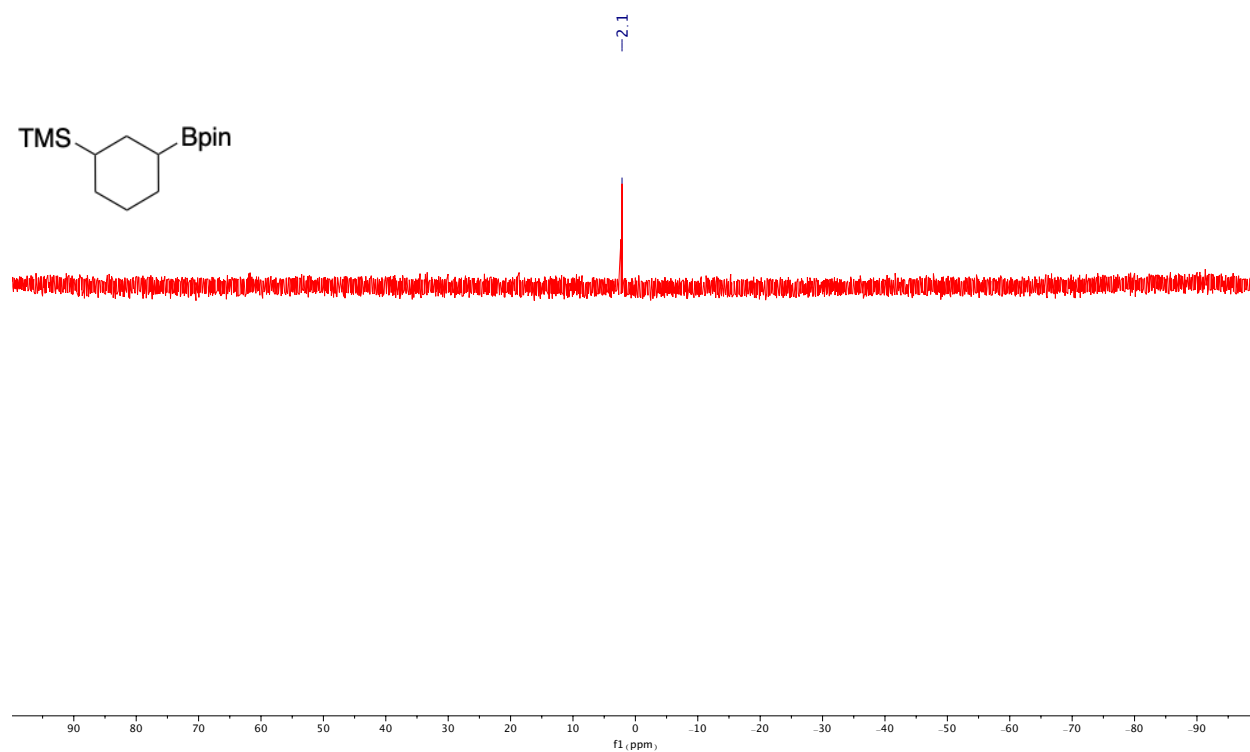

<sup>11</sup>B NMR (160MHz, CDCl<sub>3</sub>) of Trimethyl(3-(4,4,5,5-tetramethyl-1,3,2-dioxaborolan-2-yl)cyclohexyl)silane (2ae)

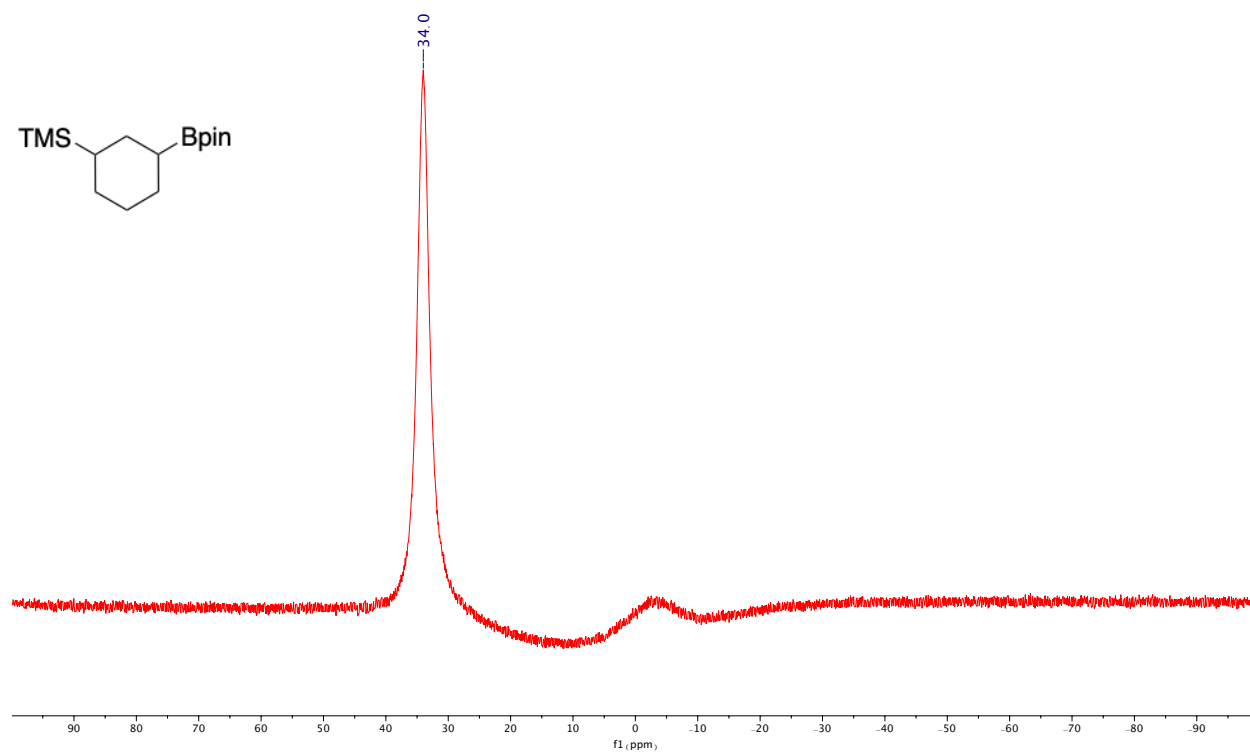

**(2ac)**

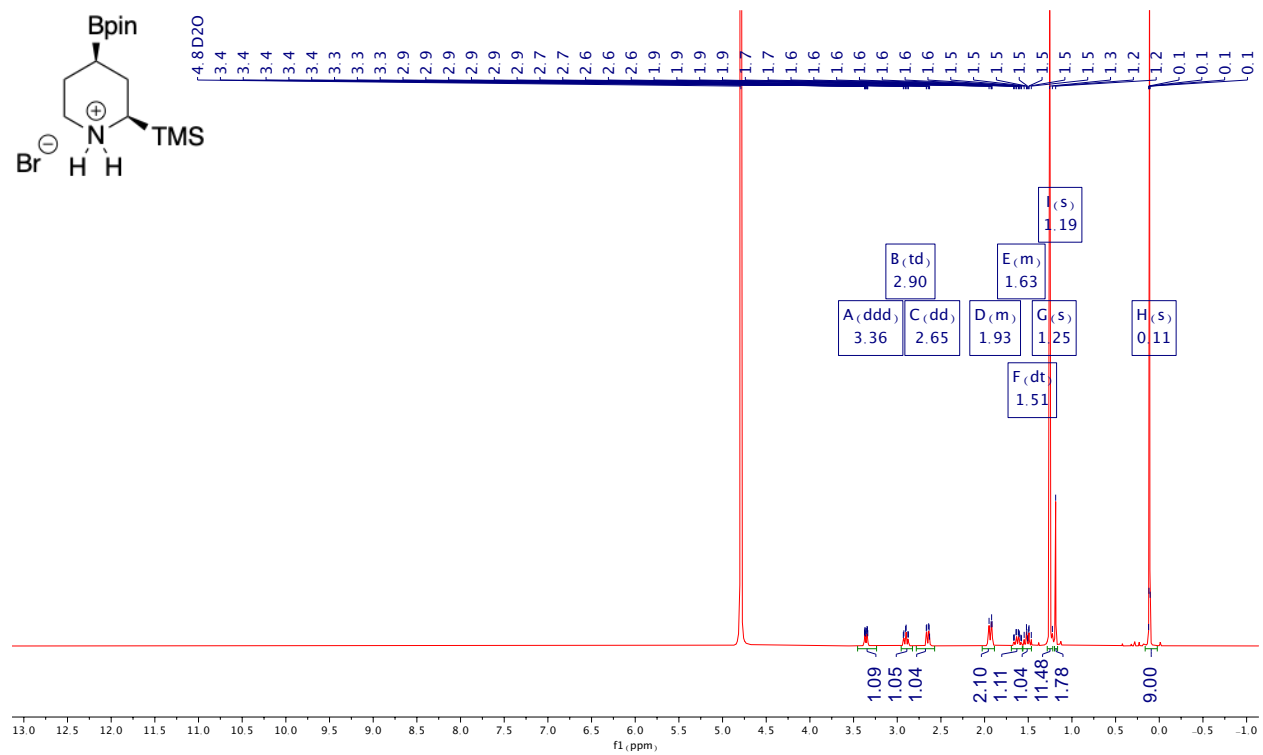

$^{13}\text{C}\{^1\text{H}\}$  (126 MHz,  $\text{D}_2\text{O}$ ) of 4-(4,4,5,5-Tetramethyl-1,3,2-dioxaborolan-2-yl)-2-(trimethylsilyl)piperidin-1-ium bromide

(2ac)

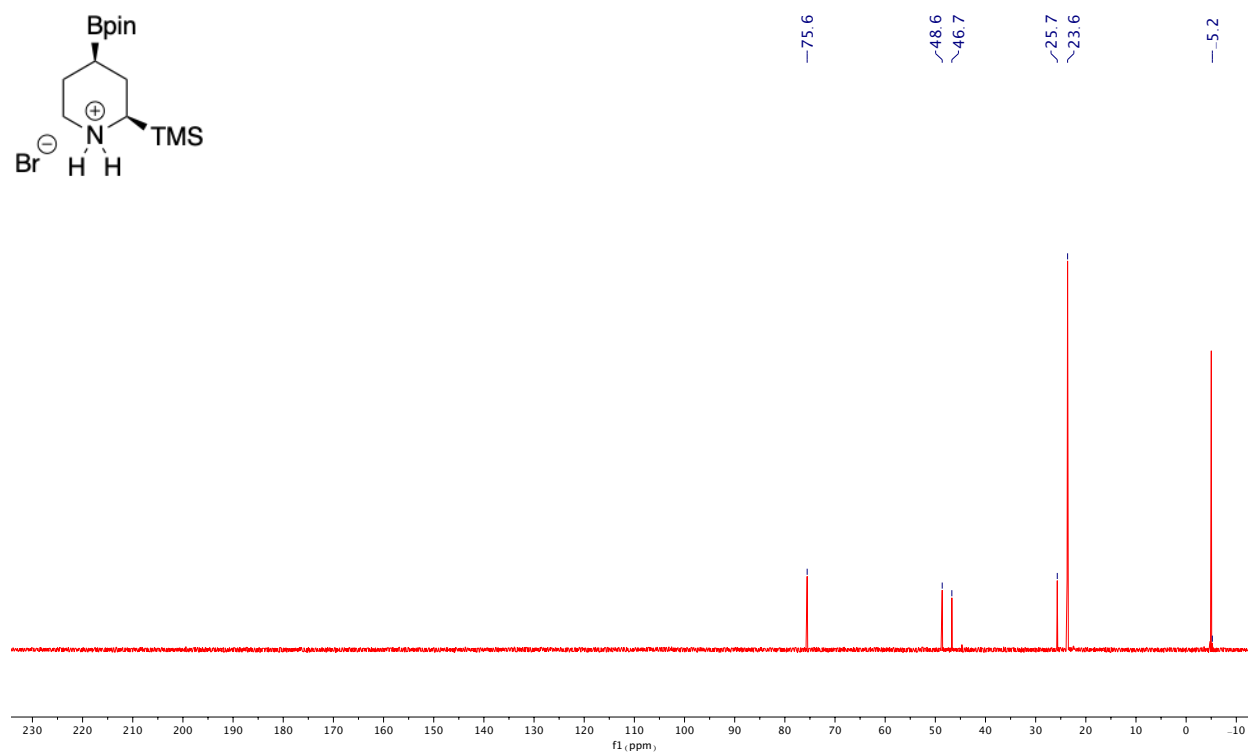

**$^{11}\text{B}$  NMR (160MHz,  $\text{D}_2\text{O}$ ) of 4-(4,4,5,5-Tetramethyl-1,3,2-dioxaborolan-2-yl)-2-(trimethylsilyl)piperidin-1-ium bromide**

**(2ac)**

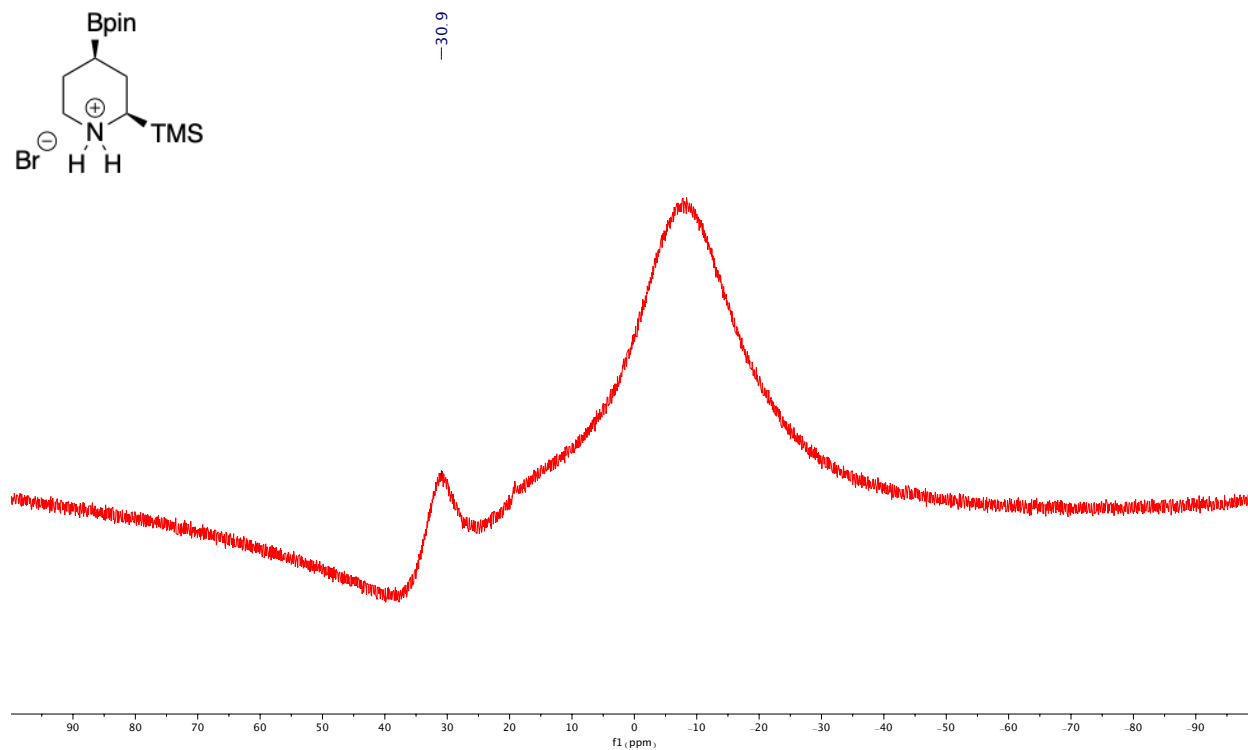

<sup>29</sup>Si NMR (99MHz, CDCl<sub>3</sub>) of 4-(4,4,5,5-Tetramethyl-1,3,2-dioxaborolan-2-yl)-2-(trimethylsilyl)piperidin-1-ium bromide (2ac)

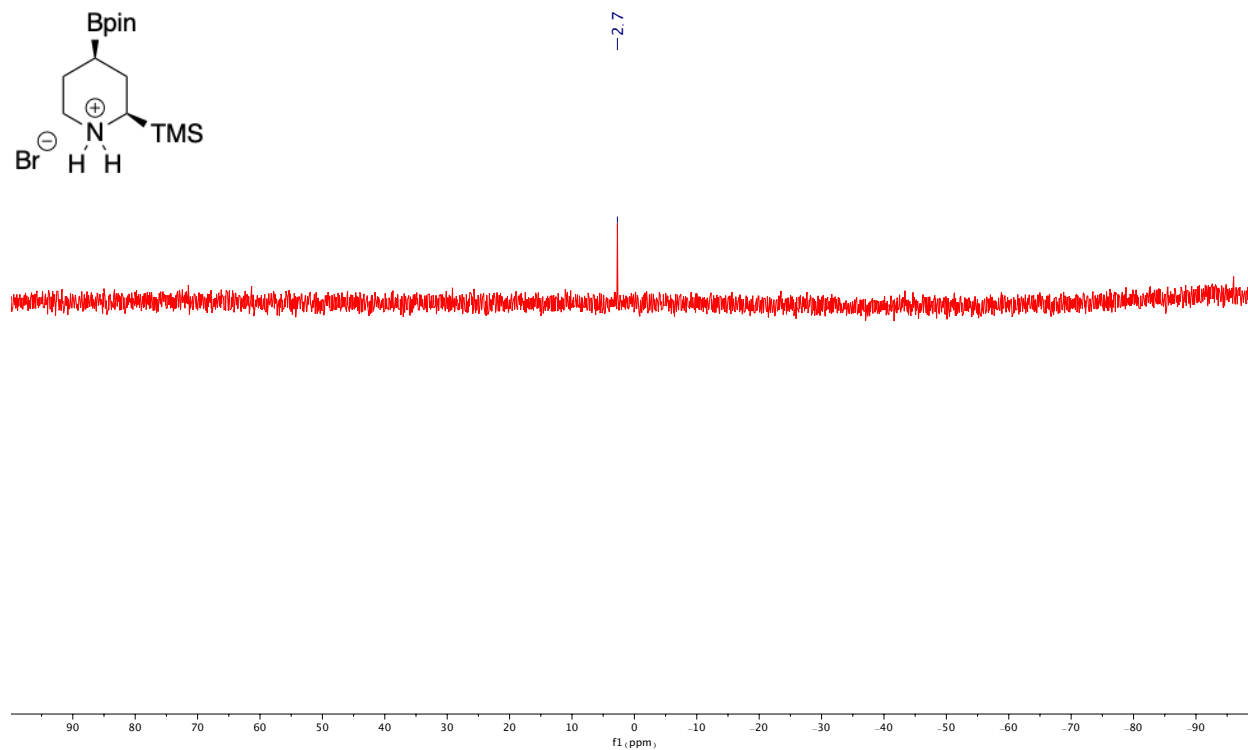

HSQC 4-(4,4,5,5-Tetramethyl-1,3,2-dioxaborolan-2-yl)-2-(trimethylsilyl)piperidin-1-ium bromide (2ac)

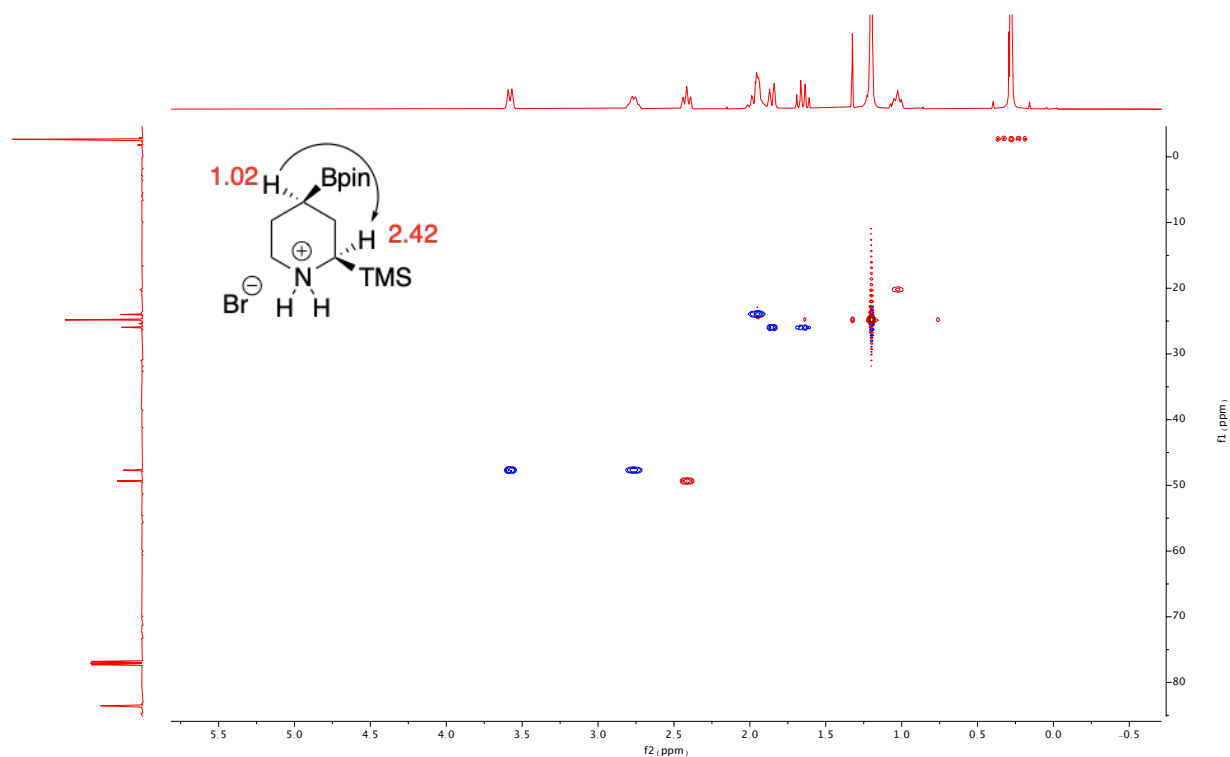

NOE of 4-(4,4,5,5-Tetramethyl-1,3,2-dioxaborolan-2-yl)-2-(trimethylsilyl)piperidin-1-ium bromide (2ac)

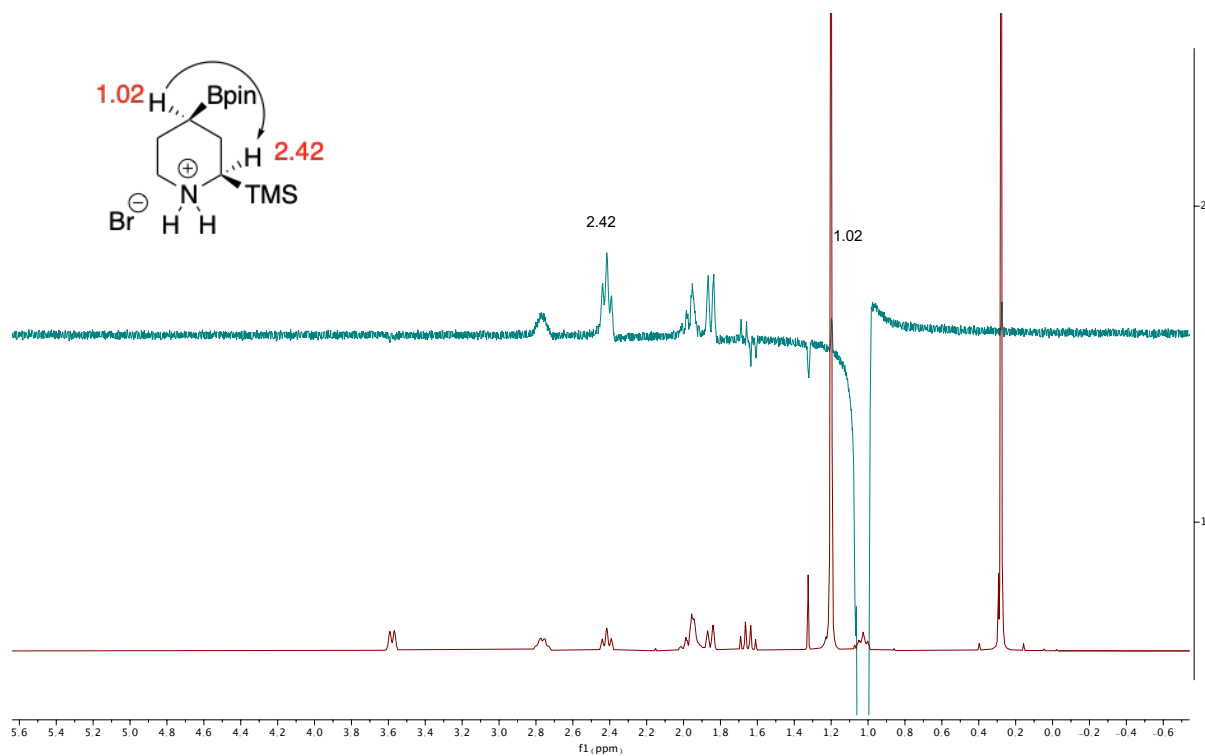

<sup>1</sup>H NMR (500MHz, CDCl<sub>3</sub>) of Trimethyl-4-(4,4,5,5-tetramethyl-1,3,2-dioxaborolan-2-yl)cyclohexyl)silane (2af)

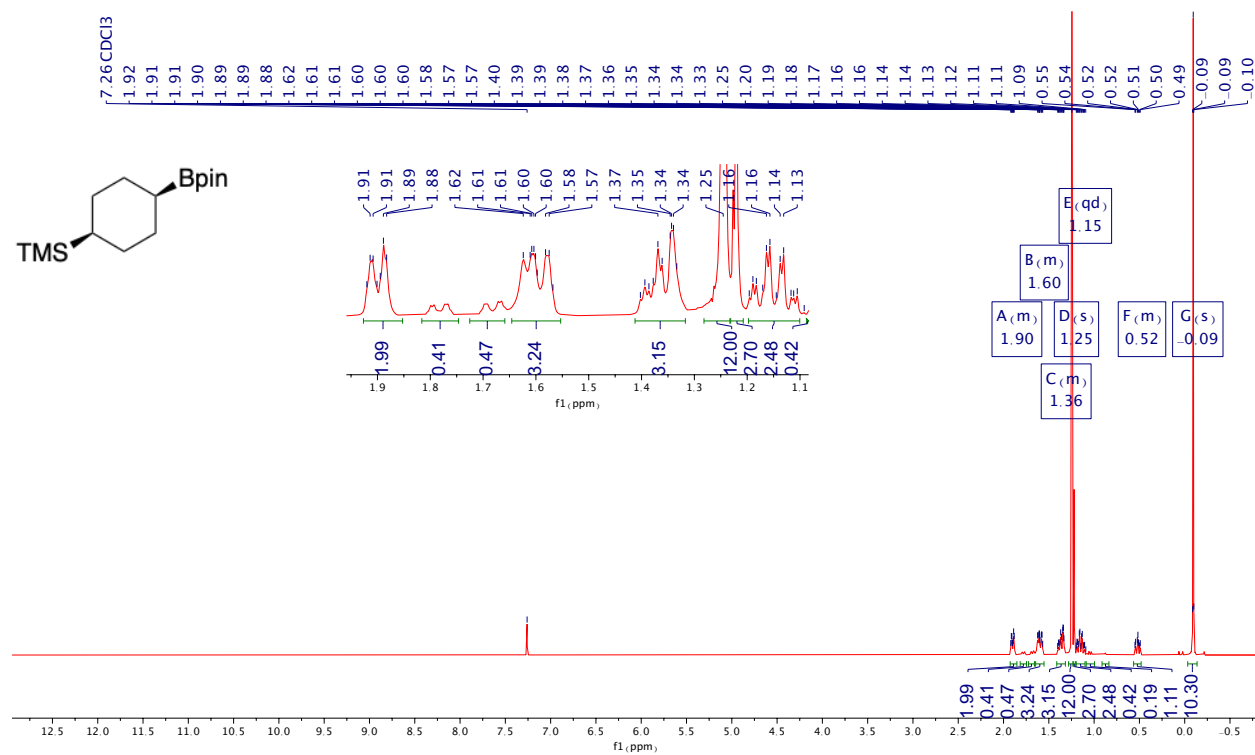

$^{13}\text{C}\{^1\text{H}\}$  (126 MHz,  $\text{CDCl}_3$ ) of Trimethyl-4-(4,4,5,5-tetramethyl-1,3,2-dioxaborolan-2-yl)cyclohexylsilane (2af)

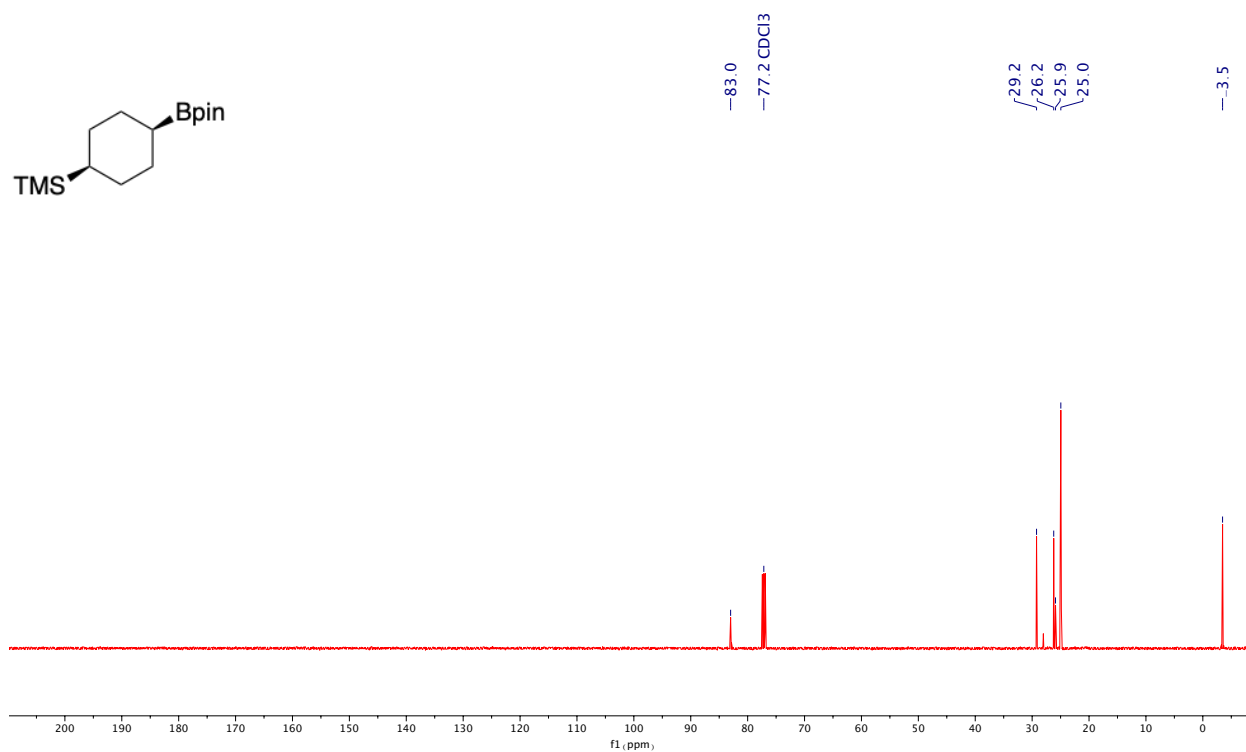

$^{11}\text{B}$  NMR (160MHz,  $\text{CDCl}_3$ ) of Trimethyl-4-(4,4,5,5-tetramethyl-1,3,2-dioxaborolan-2-yl)cyclohexylsilane (2af)

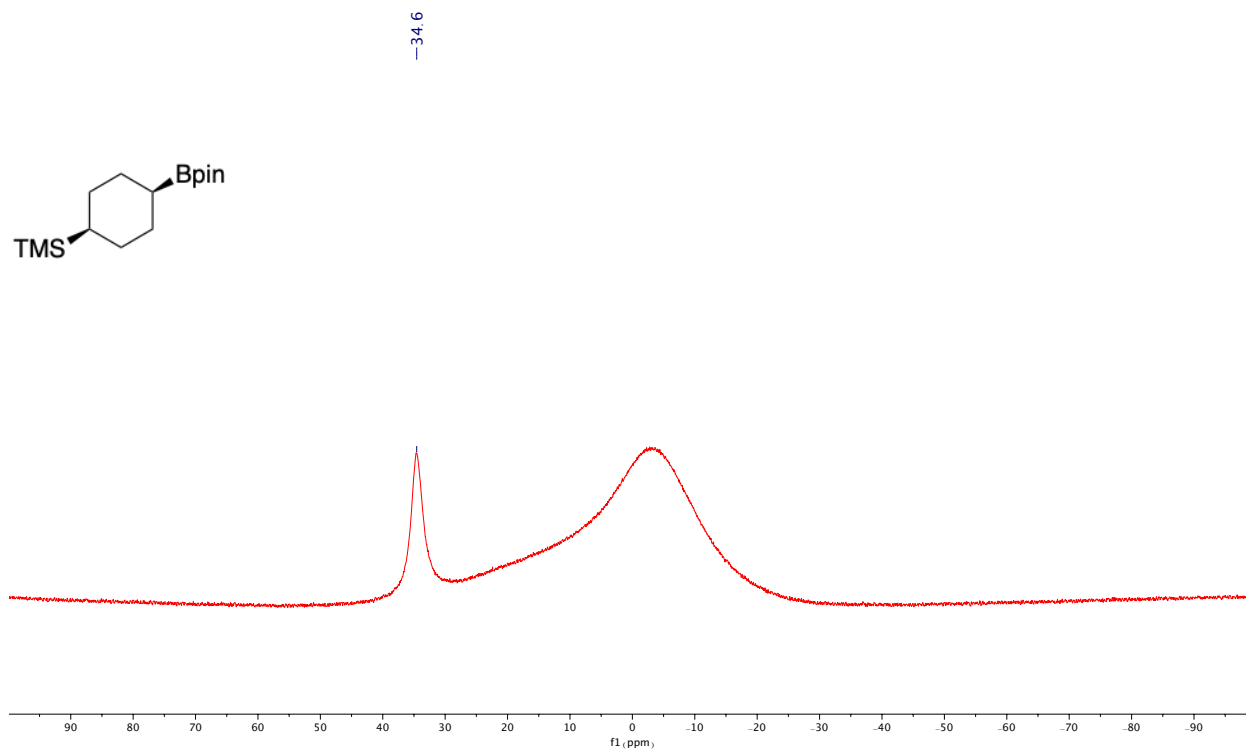

$^{29}\text{Si}$  NMR (99MHz,  $\text{CDCl}_3$ ) of Trimethyl-4-(4,4,5,5-tetramethyl-1,3,2-dioxaborolan-2-yl)cyclohexylsilane (2af)

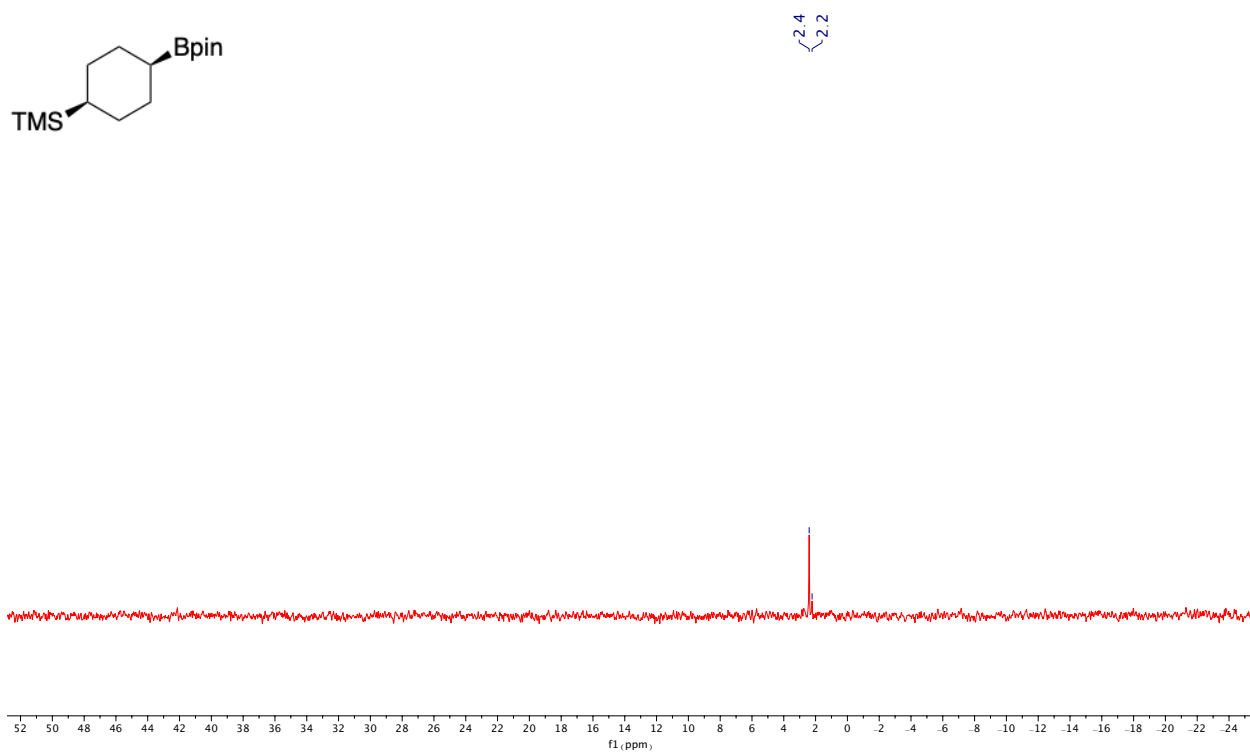

HSQC NMR Trimethyl-4-(4,4,5,5-tetramethyl-1,3,2-dioxaborolan-2-yl)cyclohexylsilane (2af)

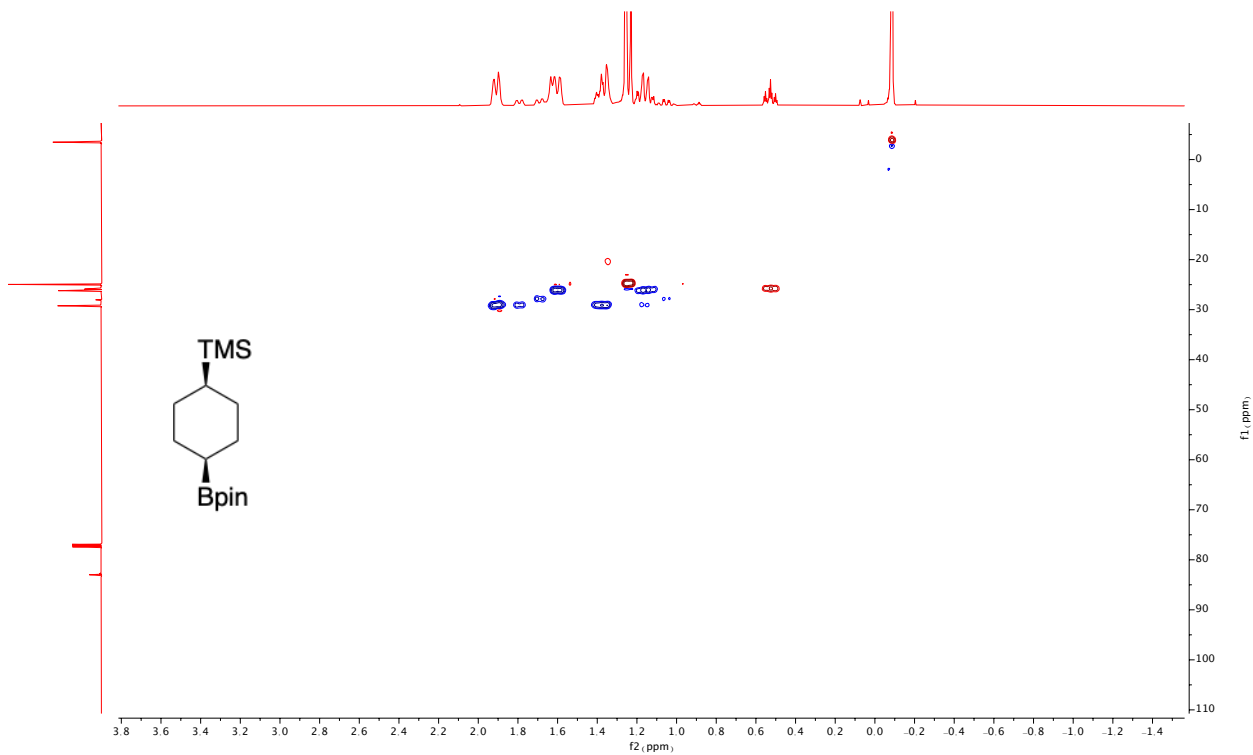

COSY NMR Trimethyl-4-(4,4,5,5-tetramethyl-1,3,2-dioxaborolan-2-yl)cyclohexyl)silane (2af)

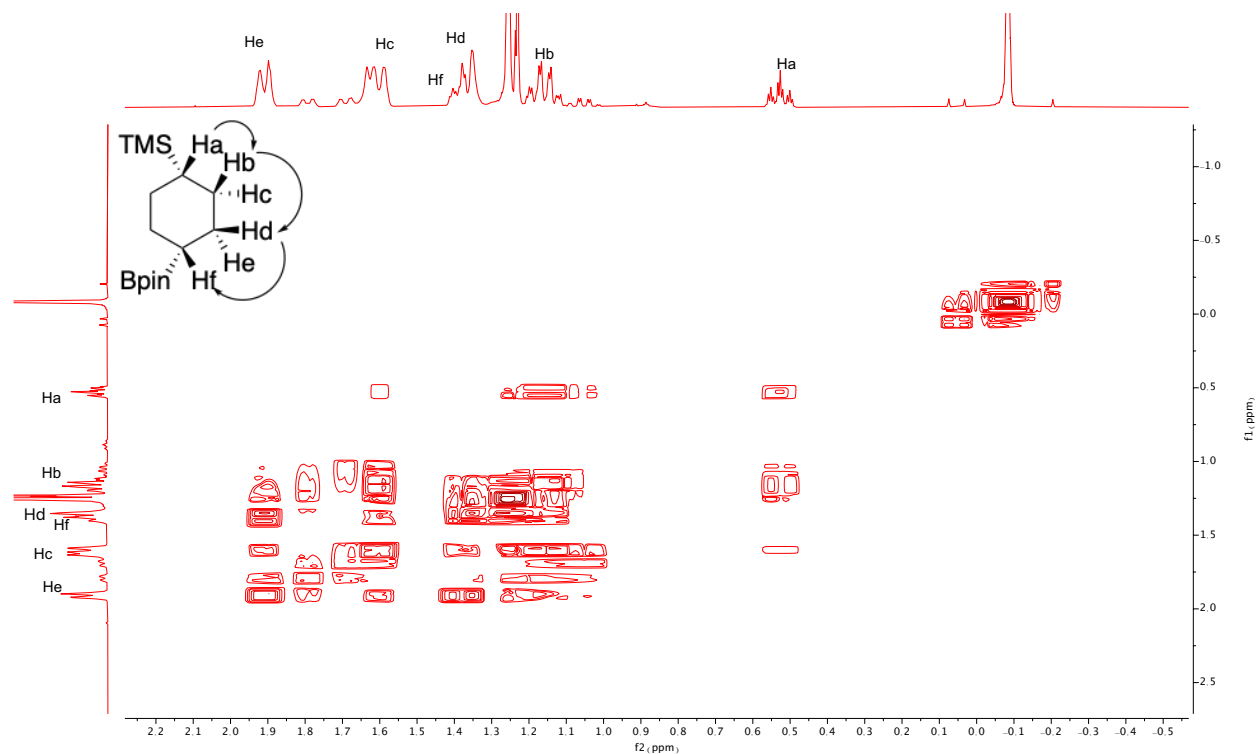

<sup>1</sup>H NMR (500MHz, CDCl<sub>3</sub>) of cis-trimethylsilyl-2-(4,4,5,5-tetramethyl-1,3,2-dioxaborolan-2-yl)cyclohexane (2ad)

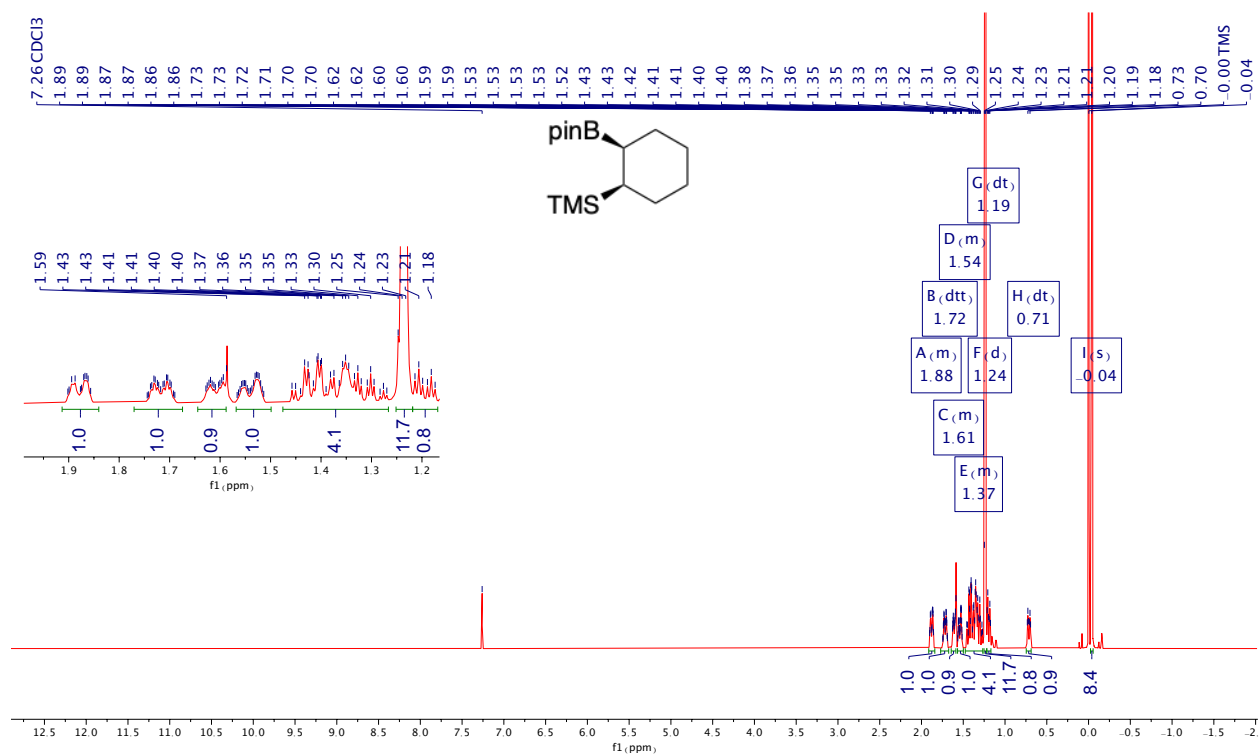

$^{13}\text{C}\{^1\text{H}\}$  (126 MHz,  $\text{CDCl}_3$ ) of cis-trimethylsilyl-2-(4,4,5,5-tetramethyl-1,3,2-dioxaborolan-2-yl)cyclohexane (2ad)

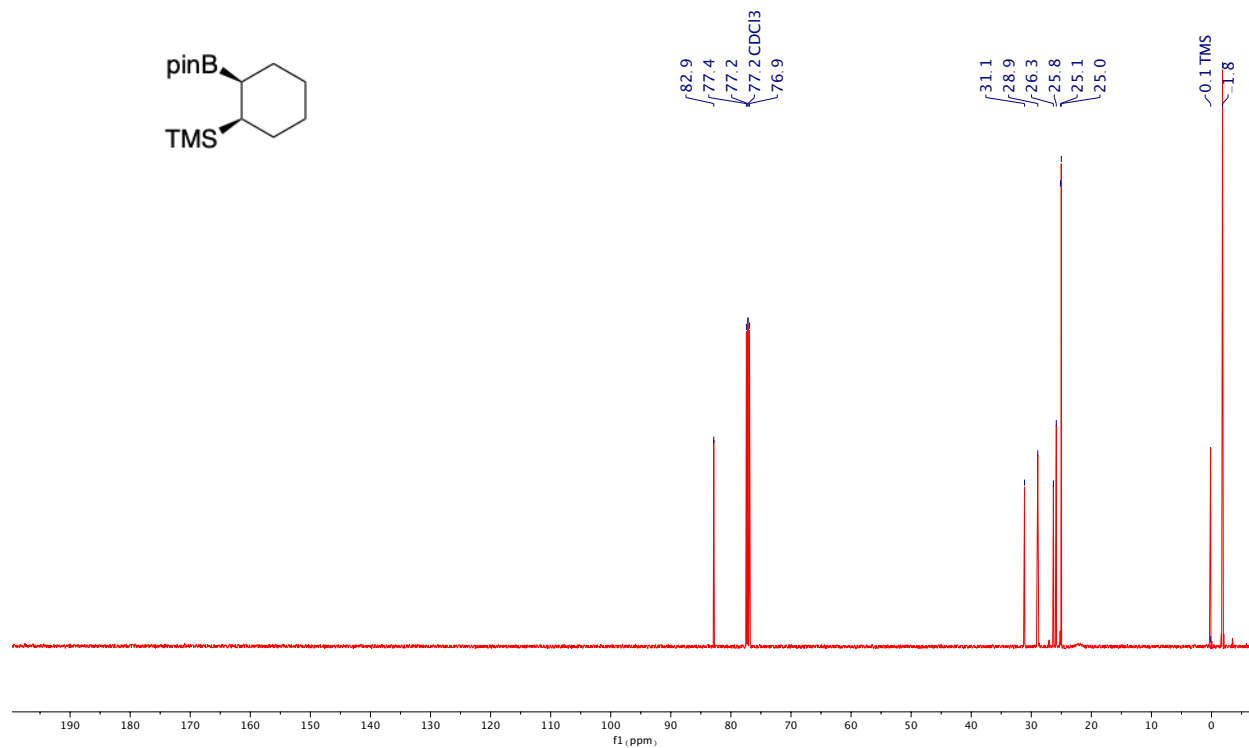

$^{11}\text{B}$  NMR (160 MHz,  $\text{CDCl}_3$ ) of cis-trimethylsilyl-2-(4,4,5,5-tetramethyl-1,3,2-dioxaborolan-2-yl)cyclohexane (2ad)

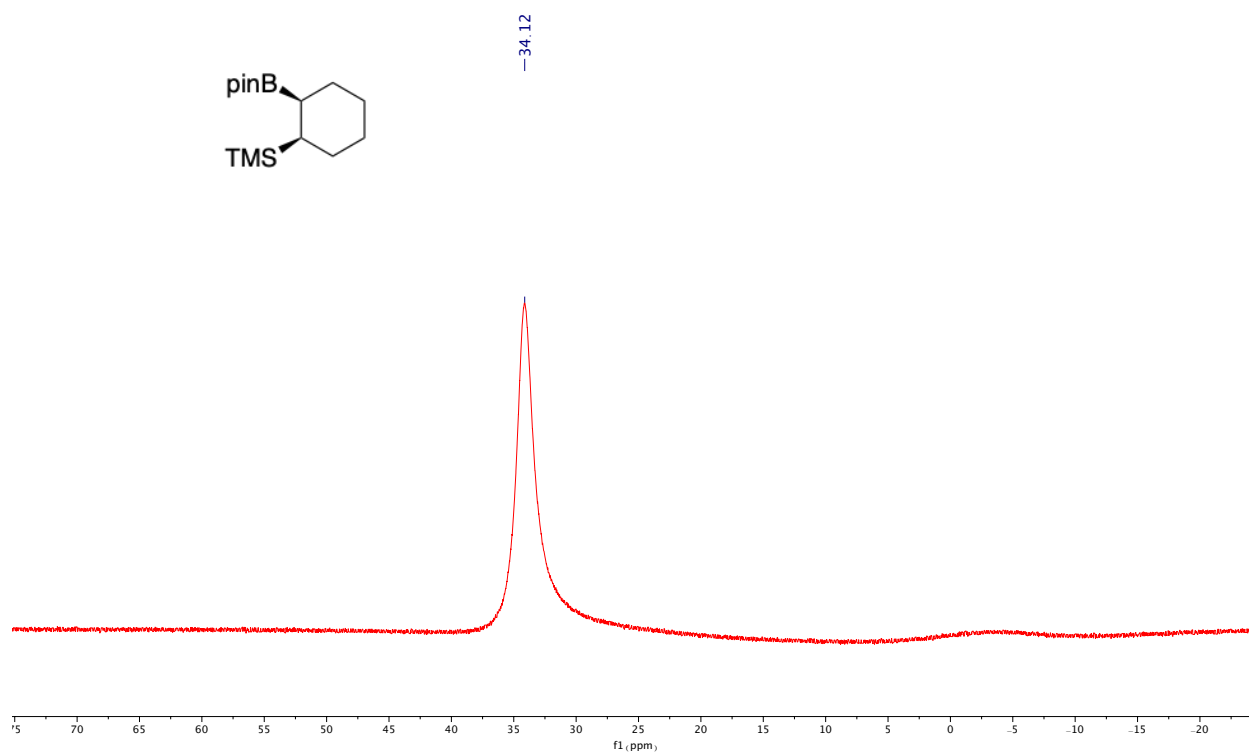

$^{29}\text{Si}$  NMR (99MHz,  $\text{CDCl}_3$ ) of cis-trimethylsilyl-2-(4,4,5,5-tetramethyl-1,3,2-dioxaborolan-2-yl)cyclohexane (2ad)

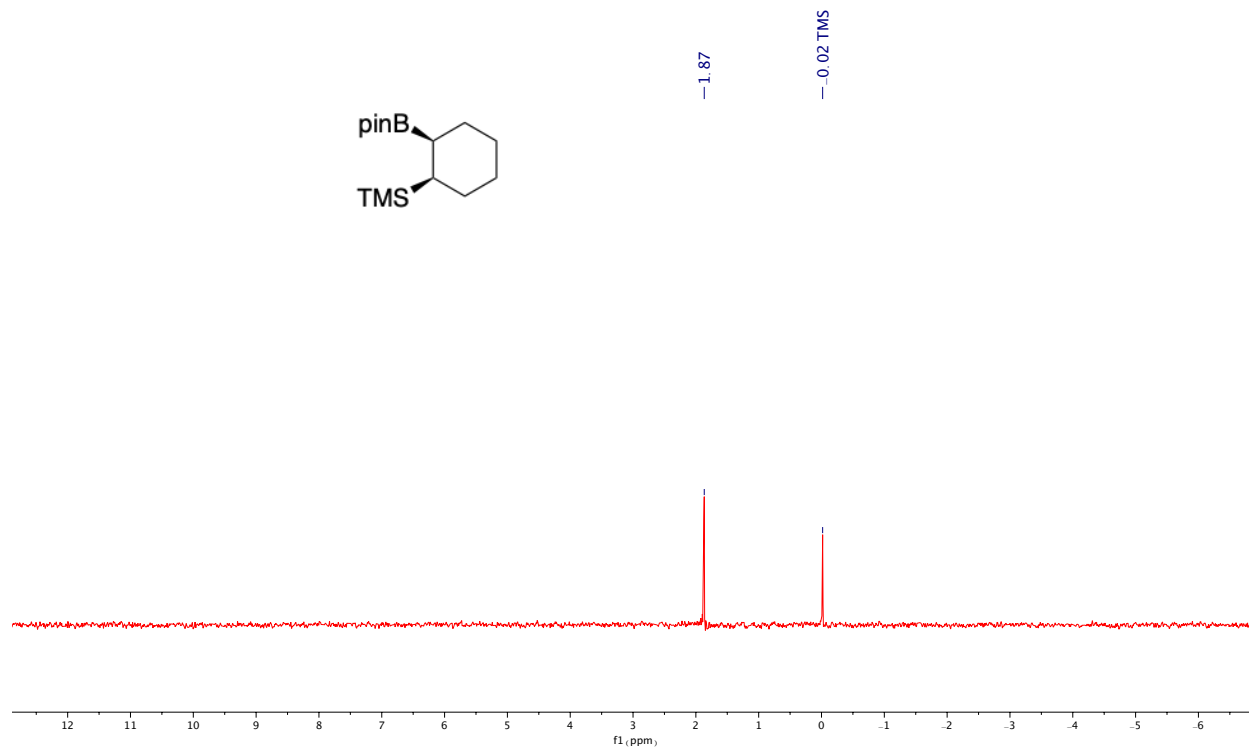

$^1\text{H}$  NMR (500 MHz,  $\text{CD}_2\text{Cl}_2$ ) of cis-trimethylsilyl-2-(4,4,5,5-tetramethyl-1,3,2-dioxaborolan-2-yl)cyclohexane (2ad)

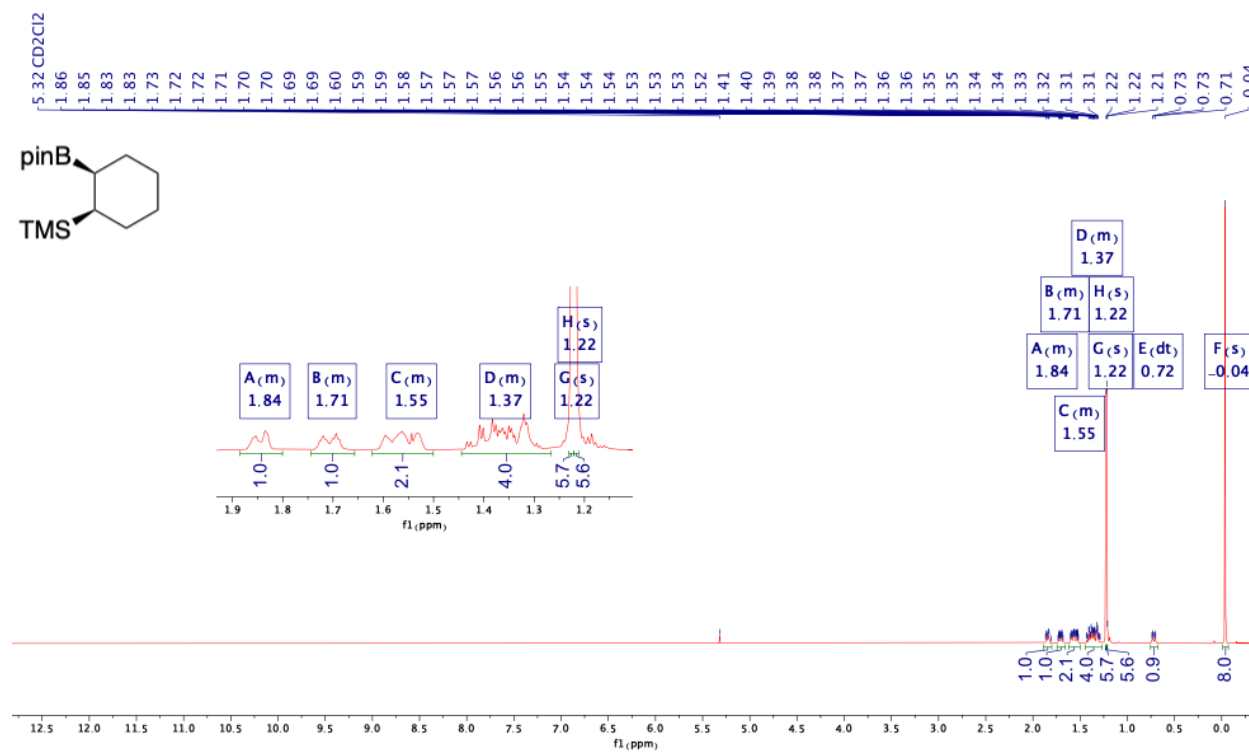

$^{13}\text{C}\{^1\text{H}\}$  (126 MHz,  $\text{CD}_2\text{Cl}_2$ ) of cis-trimethylsilyl-2-(4,4,5,5-tetramethyl-1,3,2-dioxaborolan-2-yl)cyclohexane (2ad)

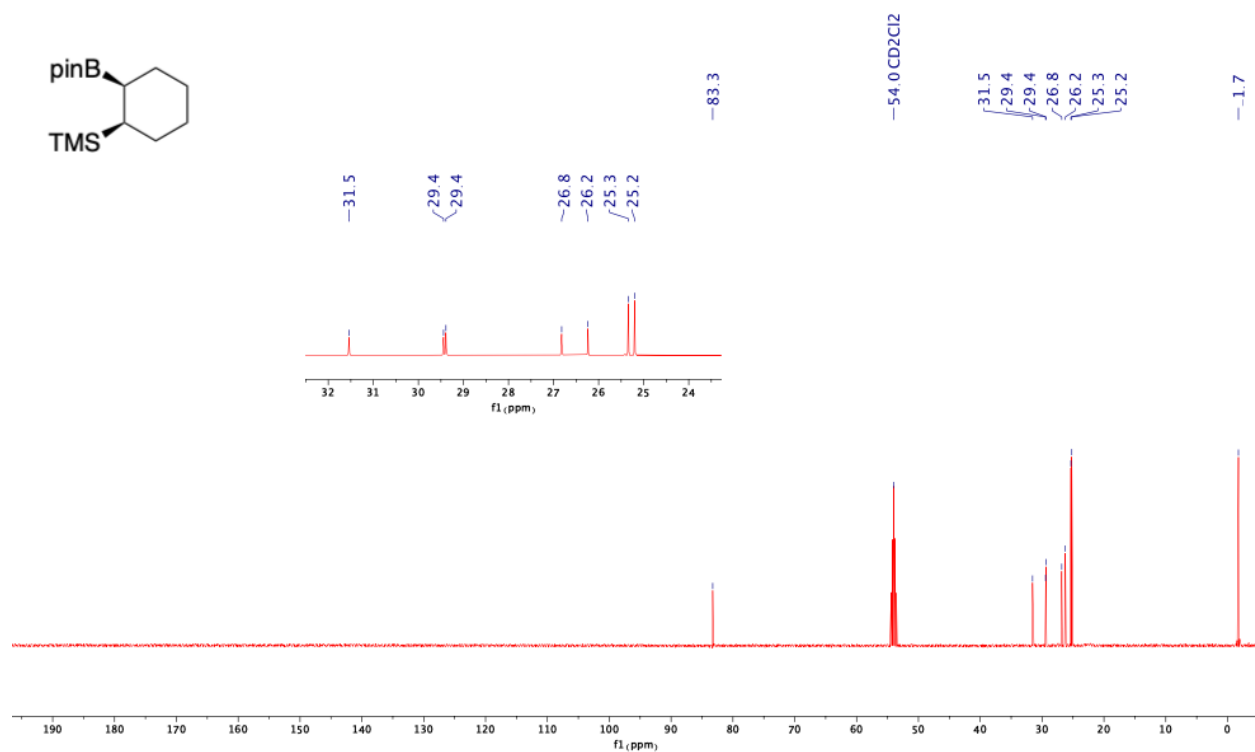

$^{11}\text{B}$  NMR (160 MHz,  $\text{CD}_2\text{Cl}_2$ ) of cis-trimethylsilyl-2-(4,4,5,5-tetramethyl-1,3,2-dioxaborolan-2-yl)cyclohexane (2ad)

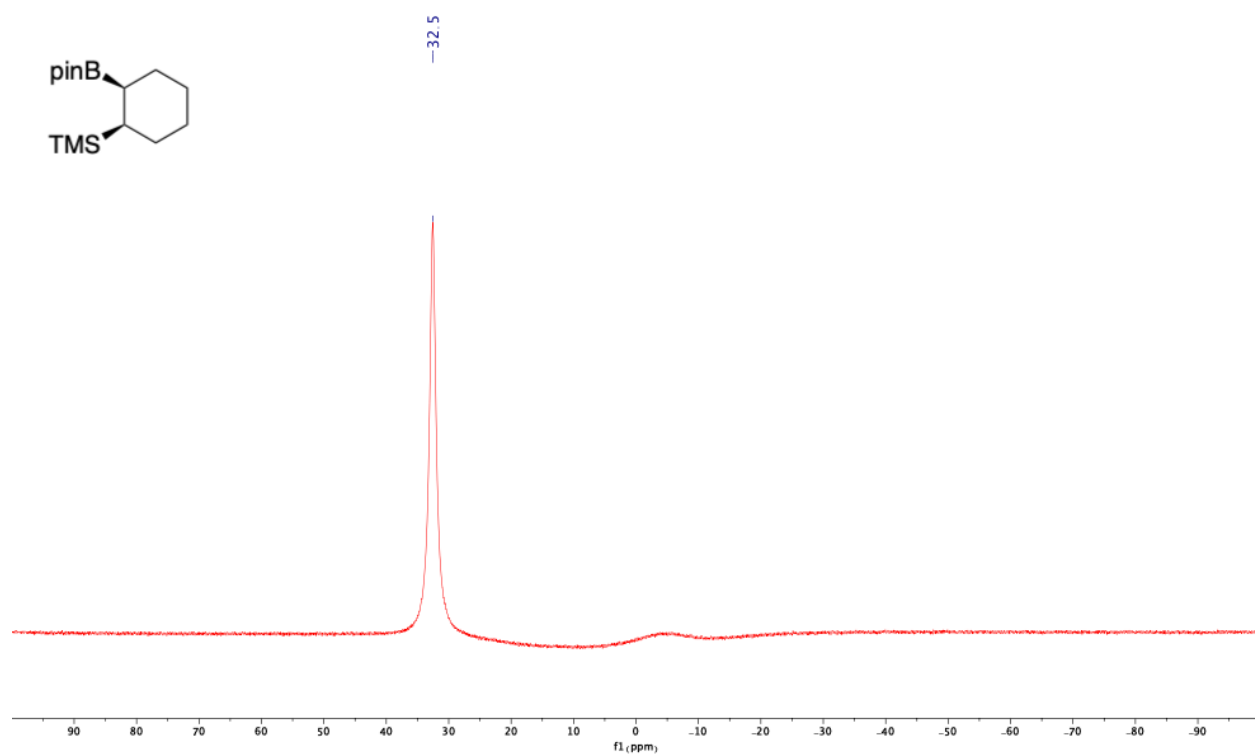

Supplement: RA-014-D4RA00491D-s001 [file RA-014-D4RA00491D-s001.pdf]
